# Supplementary material
Source: PubMed Central journal article supplement (PMC2819029)
Supplement: NIHMS169080-supplement-1_si_001.pdf [file NIHMS169080-supplement-1_si_001.pdf]

## Supporting Information for

# “Quantitative Proteomic Analysis Reveals the Perturbation of Multiple Cellular Pathways in HL-60 Cells Induced by Arsenite Treatment”

by

Lei Xiong and Yinsheng Wang

(*J. Proteome Res.*, 2010, Volume 9, pr-2009-011359)

## Table of Contents

---

|                  |                                                                                                                    |
|------------------|--------------------------------------------------------------------------------------------------------------------|
| <b>Figure S1</b> | Western blotting analysis of histones H2A, H2B, H3, H4 with lysates of arsenite-treated and untreated HL-60 cells. |
| <b>Table S1</b>  | The detailed results for all proteins quantified in this study                                                     |
| <b>Table S2</b>  | The detailed quantification results for proteins with substantial changes.                                         |
| <b>Table S3</b>  | The detailed quantification results for histone proteins.                                                          |
| <b>Table S4</b>  | Quantification results for hnRNPs, translation initiation factors, elongation factors and ribosomal proteins.      |

---

**Figure S1.** Western blotting analysis of histones H2A, H2B, H3, H4 with lysates of arsenite-treated (“+NaAsO<sub>2</sub>”) and untreated (“Control”) HL-60 cells. Actin was used as the loading control. Quantification results (based on Western analysis) showed that histones H2A, H2B, H3 and H4 were upregulated by 1.56, 1.55, 1.52, and 1.44 folds, respectively.

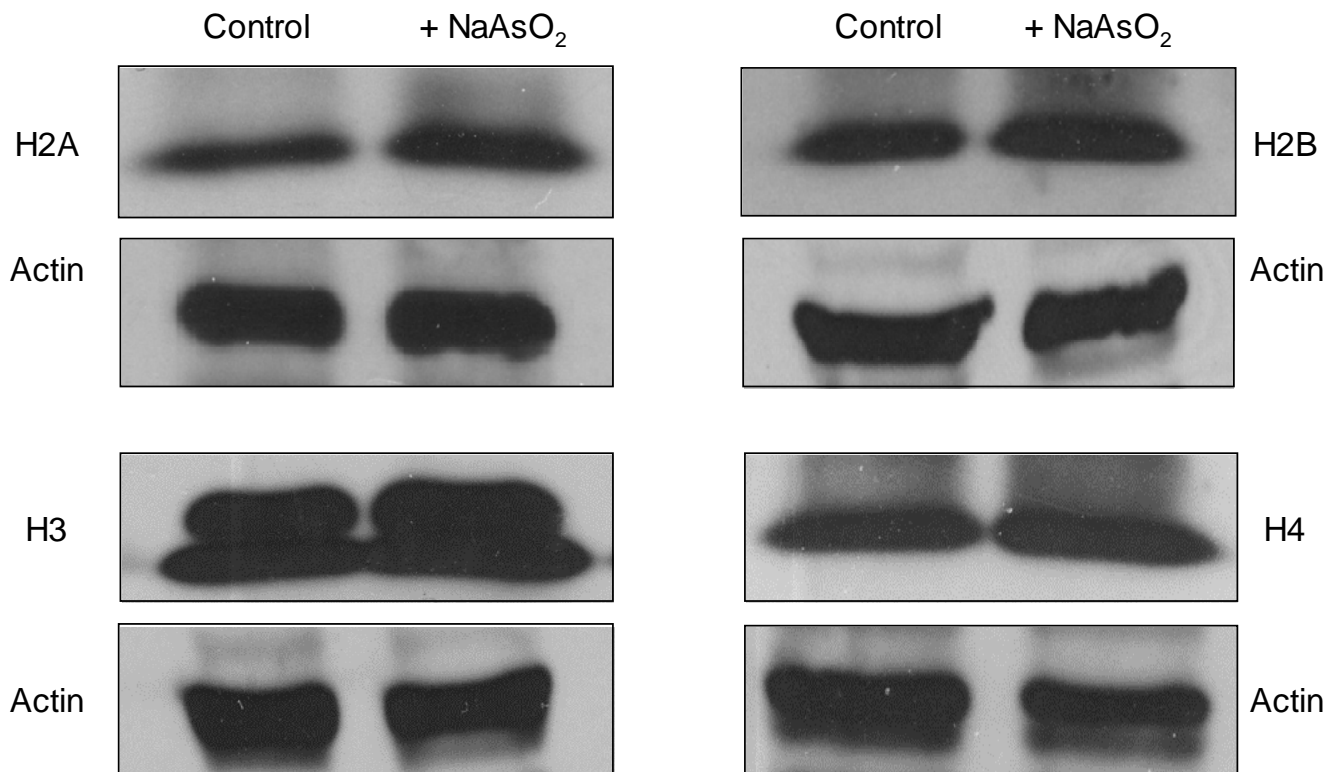

**Table S1. Detailed results for all proteins quantified in this study**

|              | <b>GI Number and Protein Name</b>                                                       | <b>Forward,<br/>set1</b> | <b>Forward,<br/>set2</b> | <b>Reverse,<br/>set3</b> | <b>Pepide<br/>Number</b> | <b>Average<br/>Ratio</b> | <b>S.D.</b> |
|--------------|-----------------------------------------------------------------------------------------|--------------------------|--------------------------|--------------------------|--------------------------|--------------------------|-------------|
| gi 21755073  | unnamed protein product                                                                 | 0.442                    | 0.416                    | 0.403                    | 1                        | 0.420                    | 0.020       |
| gi 119587276 | hCG19802, isoform CRA_a                                                                 | 0.621                    | 0.551                    | 0.243                    | 1                        | 0.472                    | 0.201       |
| gi 35570     | unnamed protein product                                                                 | 0.552                    | 0.521                    | 0.411                    | 2                        | 0.495                    | 0.074       |
| gi 386547    | d(TTAGGG)n-binding protein B39                                                          | 0.652                    | 0.592                    | 0.25                     | 1                        | 0.498                    | 0.217       |
| gi 13477237  | ZNF607 protein                                                                          | 0.555                    |                          | 0.486                    | 2                        | 0.521                    | 0.049       |
| gi 181969    | elongation factor 2                                                                     | 0.447                    | 0.545                    | 0.636                    | 3                        | 0.543                    | 0.095       |
| gi 531202    | spermidine synthase                                                                     | 0.466                    | 0.465                    | 0.773                    | 2                        | 0.568                    | 0.178       |
| gi 35844     | unnamed protein product                                                                 | 0.442                    | 0.551                    | 0.739                    | 1                        | 0.577                    | 0.150       |
| gi 119597533 | heterogeneous nuclear ribonucleoprotein U (scaffold attachment factor A), isoform CRA_b | 0.583                    | 0.582                    | 0.602                    | 1                        | 0.589                    | 0.011       |
| gi 38202255  | threonyl-tRNA synthetase                                                                | 0.552                    | 0.728                    | 0.512                    | 2                        | 0.597                    | 0.115       |
| gi 114645930 | PREDICTED: nucleosome assembly protein 1-like 1 isoform 9                               | 0.583                    | 0.615                    | 0.599                    | 3                        | 0.599                    | 0.016       |
| gi 431422    | Ran/TC4 Binding Protein                                                                 | 0.673                    | 0.769                    | 0.358                    | 2                        | 0.600                    | 0.215       |
| gi 2580550   | dead box, X isoform                                                                     | 0.602                    | 0.71                     | 0.512                    | 3                        | 0.608                    | 0.099       |
| gi 41584442  | fatty acid synthase                                                                     | 0.704                    | 0.612                    | 0.512                    | 5                        | 0.609                    | 0.096       |
| gi 122168    | HLA class I histocompatibility antigen, B-58 $\alpha$ chain                             | 0.731                    | 0.724                    | 0.375                    | 2                        | 0.610                    | 0.204       |
| gi 21754758  | unnamed protein product                                                                 | 0.684                    | 0.615                    | 0.547                    | 3                        | 0.615                    | 0.069       |
| gi 19353009  | Similar to Elongation factor 2b                                                         | 0.55                     | 0.65                     | 0.651                    | 2                        | 0.617                    | 0.058       |
| gi 193788267 | unnamed protein product                                                                 | 0.681                    | 0.658                    | 0.538                    | 3                        | 0.626                    | 0.077       |
| gi 801893    | leucine-rich PPR-motif containing protein                                               | 0.547                    | 0.595                    | 0.742                    | 3                        | 0.628                    | 0.102       |
| gi 5107666   | importin $\beta$                                                                        | 0.59                     | 0.453                    | 0.849                    | 5                        | 0.631                    | 0.201       |
| gi 181486    | DNA-binding protein B                                                                   | 0.592                    | 0.716                    | 0.587                    | 1                        | 0.632                    | 0.073       |
| gi 1235727   | unnamed protein product                                                                 | 0.562                    |                          | 0.71                     | 2                        | 0.636                    | 0.105       |
| gi 1230564   | Gu protein                                                                              | 0.743                    | 0.693                    | 0.489                    | 2                        | 0.642                    | 0.135       |
| gi 66392203  | NME1-NME2 protein                                                                       | 0.704                    | 0.441                    | 0.78                     | 5                        | 0.642                    | 0.178       |
| gi 4506707   | ribosomal protein S25                                                                   | 0.552                    | 0.615                    | 0.771                    | 1                        | 0.646                    | 0.113       |
| gi 40225729  | FUBP1 protein                                                                           | 0.706                    |                          | 0.589                    | 1                        | 0.648                    | 0.083       |
| gi 2661039   | alpha enolase                                                                           | 0.564                    | 0.689                    | 0.691                    | 5                        | 0.648                    | 0.073       |
| gi 119571409 | hCG1643342, isoform CRA_a                                                               | 0.682                    | 0.635                    | 0.627                    | 1                        | 0.648                    | 0.030       |
| gi 386777    | transplantation antigen                                                                 | 0.716                    | 0.636                    | 0.618                    | 2                        | 0.657                    | 0.052       |
| gi 1136741   | KIAA0002                                                                                | 0.731                    | 0.812                    | 0.438                    | 3                        | 0.660                    | 0.197       |
| gi 190281    | protein phosphatase I alpha subunit                                                     | 0.683                    | 0.657                    | 0.643                    | 1                        | 0.661                    | 0.020       |
| gi 55958547  | heterogeneous nuclear ribonucleoprotein K                                               | 0.773                    | 0.724                    | 0.489                    | 3                        | 0.662                    | 0.152       |
| gi 23712     | myoblast antigen 24.1D5                                                                 | 0.574                    | 0.704                    | 0.71                     | 3                        | 0.663                    | 0.077       |
| gi 13569879  | acidic (leucine-rich) nuclear phosphoprotein 32 family, member E isoform 1              | 0.616                    | 0.753                    | 0.629                    | 3                        | 0.666                    | 0.076       |
| gi 4507789   | ubiquitin-conjugating enzyme E2L 3 isoform 1                                            | 0.614                    | 0.657                    | 0.734                    | 5                        | 0.668                    | 0.061       |
| gi 14124984  | Chaperonin containing TCP1, subunit 3 (gamma)                                           | 0.719                    | 0.75                     | 0.551                    | 4                        | 0.673                    | 0.107       |
| gi 20071957  | ZC3HAV1 protein                                                                         | 0.719                    | 0.753                    | 0.551                    | 1                        | 0.674                    | 0.108       |
| gi 40675359  | EIF3A protein                                                                           | 0.565                    | 0.691                    | 0.774                    | 3                        | 0.677                    | 0.105       |

|              |                                                                                                 |       |       |       |   |       |       |
|--------------|-------------------------------------------------------------------------------------------------|-------|-------|-------|---|-------|-------|
| gi 119628379 | chaperonin containing TCP1, subunit 6A (zeta 1), isoform CRA_b                                  | 0.719 | 0.762 | 0.551 | 2 | 0.677 | 0.112 |
| gi 15779184  | FLNA protein                                                                                    | 0.495 | 0.834 | 0.706 | 5 | 0.678 | 0.171 |
| gi 119610575 | eukaryotic translation initiation factor 4A, isoform 1, isoform CRA_c                           | 0.646 | 0.693 | 0.697 | 3 | 0.679 | 0.028 |
| gi 1322019   | uroporphyrinogen decarboxylase                                                                  | 0.827 | 0.538 | 0.678 | 1 | 0.681 | 0.145 |
| gi 4506669   | ribosomal protein P1 isoform 1                                                                  | 0.625 | 0.706 | 0.729 | 2 | 0.687 | 0.055 |
| gi 5006420   | ribonucleotide reductase M1 subunit                                                             | 0.737 | 0.662 | 0.661 | 3 | 0.687 | 0.044 |
| gi 4503475   | eukaryotic translation elongation factor 1 alpha 2                                              | 0.684 | 0.652 | 0.726 | 1 | 0.687 | 0.037 |
| gi 7108915   | glucocorticoid receptor AF-1 specific elongation factor                                         | 0.685 | 0.677 | 0.703 | 3 | 0.688 | 0.013 |
| gi 119390147 | Chain A, Crystal Structure Of The Heterodimeric Complex Of Human Rgs10 And Activated Gi Alpha 3 | 0.755 | 0.687 | 0.628 | 1 | 0.690 | 0.064 |
| gi 119631661 | Sjogren syndrome antigen B (autoantigen La), isoform CRA_a                                      | 0.764 | 0.611 | 0.707 | 2 | 0.694 | 0.077 |
| gi 119616807 | hCG2043493                                                                                      | 0.687 | 0.733 | 0.663 | 1 | 0.694 | 0.036 |
| gi 4506661   | ribosomal protein L7a                                                                           | 0.702 | 0.649 | 0.734 | 2 | 0.695 | 0.043 |
| gi 15809590  | hnRNP Q1                                                                                        | 0.743 | 0.736 | 0.61  | 5 | 0.696 | 0.075 |
| gi 169172618 | hCG2041218                                                                                      | 0.708 | 0.696 | 0.687 | 2 | 0.697 | 0.011 |
| gi 119623684 | FLJ45422 protein, isoform CRA_b                                                                 | 0.706 | 0.718 | 0.672 | 1 | 0.699 | 0.024 |
| gi 33356163  | eukaryotic translation initiation factor 1A, Y chromosome                                       | 0.745 | 0.59  | 0.762 | 3 | 0.699 | 0.095 |
| gi 62089002  | RAB40B, member RAS oncogene family variant                                                      | 0.732 | 0.589 | 0.777 | 1 | 0.699 | 0.098 |
| gi 5031635   | cofilin 1 (non-muscle)                                                                          | 0.688 | 0.886 | 0.526 | 1 | 0.700 | 0.180 |
| gi 550021    | ribosomal protein S5                                                                            | 0.458 | 0.815 | 0.829 | 4 | 0.701 | 0.210 |
| gi 67464424  | Chain A, 14-3-3 Protein Epsilon (Human) Complexed To Peptide                                    | 0.774 | 0.729 | 0.6   | 3 | 0.701 | 0.090 |
| gi 23397696  | copine I isoform a                                                                              | 0.74  | 0.802 | 0.562 | 2 | 0.701 | 0.125 |
| gi 2914385   | Chain C, Human Pcna                                                                             | 0.573 | 0.761 | 0.771 | 2 | 0.702 | 0.112 |
| gi 56789234  | TARS protein                                                                                    | 0.593 | 0.681 | 0.831 | 3 | 0.702 | 0.120 |
| gi 38014625  | RPL8 protein                                                                                    | 0.573 | 0.768 | 0.774 | 3 | 0.705 | 0.114 |
| gi 76825391  | ST13 protein                                                                                    | 0.831 | 0.721 | 0.566 | 2 | 0.706 | 0.133 |
| gi 23304751  | MHC class I antigen                                                                             | 0.712 | 0.789 | 0.631 | 5 | 0.711 | 0.079 |
| gi 577295    | KIAA0088                                                                                        | 0.57  | 0.733 | 0.831 | 5 | 0.711 | 0.132 |
| gi 7513316   | ribosomal protein L14 - human                                                                   | 0.758 | 0.652 | 0.726 | 5 | 0.712 | 0.054 |
| gi 485388    | eukaryotic initiation factor 4All                                                               | 0.646 | 0.718 | 0.775 | 2 | 0.713 | 0.065 |
| gi 119616611 | cold shock domain protein A, isoform CRA_c                                                      | 0.724 | 0.677 | 0.738 | 2 | 0.713 | 0.032 |
| gi 1431788   | Chain A, Determination Of The Nmr Solution Structure Of The Cyclophilin A-Cyclosporin A Complex | 0.703 | 0.709 | 0.732 | 5 | 0.715 | 0.015 |
| gi 31092     | unnamed protein product                                                                         | 0.687 | 0.733 | 0.728 | 5 | 0.716 | 0.025 |
| gi 1931584   | eIF-3 p110 subunit                                                                              | 0.688 | 0.683 | 0.784 | 3 | 0.718 | 0.057 |
| gi 19923193  | heat shock 70kD protein binding protein                                                         | 0.837 | 0.735 | 0.589 | 2 | 0.720 | 0.125 |
| gi 66933016  | inosine monophosphate dehydrogenase 2                                                           | 0.748 | 0.701 | 0.718 | 5 | 0.722 | 0.024 |
| gi 4504327   | mitochondrial trifunctional protein, beta subunit precursor                                     | 0.614 | 0.75  | 0.813 | 3 | 0.726 | 0.102 |
| gi 4503471   | eukaryotic translation elongation factor 1 alpha 1                                              | 0.684 | 0.652 | 0.841 | 2 | 0.726 | 0.101 |
| gi 119614929 | tripartite motif-containing 25, isoform CRA_a                                                   | 0.742 |       | 0.714 | 1 | 0.728 | 0.020 |
| gi 2623761   | Aac11                                                                                           | 0.707 |       | 0.75  | 2 | 0.729 | 0.030 |
| gi 62897525  | eukaryotic translation elongation factor 1 alpha 1 variant                                      | 0.789 | 0.722 | 0.68  | 3 | 0.730 | 0.055 |
| gi 36796     | t-complex polypeptide 1                                                                         | 0.74  | 0.835 | 0.618 | 2 | 0.731 | 0.109 |

|              |                                                                                            |       |       |       |   |       |       |
|--------------|--------------------------------------------------------------------------------------------|-------|-------|-------|---|-------|-------|
| gi 181484    | DNA-binding protein A                                                                      | 0.801 | 0.657 | 0.738 | 2 | 0.732 | 0.072 |
| gi 4503481   | eukaryotic translation elongation factor 1 gamma                                           | 0.729 | 0.637 | 0.834 | 2 | 0.733 | 0.099 |
| gi 119587829 | ribosomal protein S25, isoform CRA_a                                                       |       | 0.634 | 0.835 | 3 | 0.735 | 0.142 |
| gi 119592244 | myosin, heavy polypeptide 14, isoform CRA_a                                                | 0.756 | 0.732 | 0.722 | 3 | 0.737 | 0.017 |
| gi 182994    | Ga subunit                                                                                 | 0.878 | 0.711 | 0.628 | 1 | 0.739 | 0.127 |
| gi 4506685   | ribosomal protein S13                                                                      | 0.789 | 0.586 | 0.845 | 2 | 0.740 | 0.136 |
| gi 116284394 | myosin, heavy chain 14 isoform 2                                                           | 0.767 | 0.732 | 0.722 | 5 | 0.740 | 0.024 |
| gi 1498227   | PHAPI2b protein                                                                            | 0.706 | 0.74  | 0.776 | 5 | 0.741 | 0.035 |
| gi 32189     | HLA-Bw72 antigen                                                                           | 0.667 | 0.763 | 0.792 | 3 | 0.741 | 0.065 |
| gi 34222512  | Full=HLA class I histocompatibility antigen, B-73 alpha chain                              | 0.705 | 0.726 | 0.804 | 3 | 0.745 | 0.052 |
| gi 119610572 | eukaryotic translation initiation factor 4A, isoform 1, isoform CRA_a                      | 0.859 | 0.715 | 0.663 | 4 | 0.746 | 0.102 |
| gi 74723863  | RecName: Full=60S acidic ribosomal protein P0-like                                         | 0.76  | 0.923 | 0.558 | 3 | 0.747 | 0.183 |
| gi 4759212   | tubulin-specific chaperone a                                                               | 0.851 | 0.745 | 0.647 | 5 | 0.748 | 0.102 |
| gi 1215669   | JTV-1                                                                                      | 0.74  | 0.812 | 0.694 | 1 | 0.749 | 0.059 |
| gi 37547     | unnamed protein product                                                                    | 0.731 | 0.718 | 0.798 | 2 | 0.749 | 0.043 |
| gi 4885417   | ubiquitin-conjugating enzyme E2-25K isoform 1                                              | 0.868 |       | 0.63  | 2 | 0.749 | 0.168 |
| gi 5453607   | chaperonin containing TCP1, subunit 7 isoform a                                            | 0.778 | 0.82  | 0.654 | 2 | 0.751 | 0.086 |
| gi 3041664   | Deoxyuridine 5'-triphosphate nucleotidohydrolase, mitochondrial                            | 0.669 | 0.7   | 0.898 | 2 | 0.756 | 0.124 |
| gi 5031601   | actin related protein 2/3 complex subunit 1B                                               | 0.931 | 0.6   | 0.738 | 2 | 0.756 | 0.166 |
| gi 433344    | p37 AUF1                                                                                   | 0.752 | 0.75  | 0.77  | 3 | 0.757 | 0.011 |
| gi 88988289  | hypothetical protein LOC648000 isoform 3                                                   | 0.706 | 0.824 | 0.746 | 4 | 0.759 | 0.060 |
| gi 2632123   | Xeroderma Pigmentosum Group E Complementing protein                                        | 0.731 |       | 0.788 | 3 | 0.760 | 0.040 |
| gi 4758256   | eukaryotic translation initiation factor 2, subunit 1 alpha, 35kDa                         | 0.793 |       | 0.736 | 1 | 0.765 | 0.040 |
| gi 5453740   | myosin regulatory light chain MRCL3                                                        | 0.826 | 0.771 | 0.698 | 5 | 0.765 | 0.064 |
| gi 284040    | chitinase-related protein, G protein gamma subunit                                         | 0.863 |       | 0.67  | 1 | 0.767 | 0.136 |
| gi 553254    | NADH cytochrome b5 reductase (EC 1.6.2.2)                                                  | 0.667 | 0.945 | 0.688 | 2 | 0.767 | 0.155 |
| gi 32158     | HLA-A2902                                                                                  | 0.731 | 0.787 | 0.791 | 2 | 0.770 | 0.034 |
| gi 913148    | calreticulin=calcium binding protein                                                       | 0.873 | 0.61  | 0.829 | 5 | 0.771 | 0.141 |
| gi 5031753   | heterogeneous nuclear ribonucleoprotein H1                                                 | 0.752 | 0.855 | 0.709 | 3 | 0.772 | 0.075 |
| gi 4758516   | hepatoma-derived growth factor isoform a                                                   | 0.75  |       | 0.797 | 1 | 0.774 | 0.033 |
| gi 862457    | enoyl-CoA hydratase/3-hydroxyacyl-CoA dehydrogenase alpha-subunit of trifunctional protein | 0.716 | 0.753 | 0.853 | 5 | 0.774 | 0.071 |
| gi 307066    | inosine-5'-monophosphate dehydrogenase (EC 1.1.1.205)                                      | 0.752 | 0.742 | 0.83  | 3 | 0.775 | 0.048 |
| gi 5032051   | ribosomal protein S14                                                                      | 0.793 | 0.763 | 0.769 | 3 | 0.775 | 0.016 |
| gi 4503915   | phosphoribosylglycinamide formyltransferase                                                | 0.757 | 0.902 | 0.676 | 5 | 0.778 | 0.115 |
| gi 28416899  | phosphoribosylaminoimidazole synthetase isoform 2                                          | 0.759 | 0.9   | 0.676 | 5 | 0.778 | 0.113 |
| gi 27754056  | tubulin, beta 6                                                                            | 0.831 |       | 0.73  | 3 | 0.781 | 0.071 |
| gi 36138     | ribosomal protein L6                                                                       | 0.816 | 0.763 | 0.766 | 2 | 0.782 | 0.030 |
| gi 119602640 | eukaryotic translation elongation factor 1 delta, isoform CRA_e                            | 0.729 | 0.743 | 0.874 | 5 | 0.782 | 0.080 |
| gi 693937    | polyadenylate binding protein II                                                           | 0.791 | 0.728 | 0.827 | 1 | 0.782 | 0.050 |
| gi 1200184   | stimulator of TAR RNA binding                                                              | 0.864 | 0.89  | 0.593 | 3 | 0.782 | 0.164 |
| gi 4583153   | cytosolic inorganic pyrophosphatase                                                        | 0.882 | 0.674 | 0.791 | 5 | 0.782 | 0.104 |
| gi 4929739   | CGI-135 protein                                                                            | 0.776 | 0.849 | 0.724 | 1 | 0.783 | 0.063 |

|              |                                                                             |       |       |       |   |       |       |
|--------------|-----------------------------------------------------------------------------|-------|-------|-------|---|-------|-------|
| gi 15431301  | ribosomal protein L7                                                        | 0.767 | 0.782 | 0.801 | 4 | 0.783 | 0.017 |
| gi 11056044  | pyrophosphatase 1                                                           | 0.677 | 0.745 | 0.929 | 3 | 0.784 | 0.130 |
| gi 4506753   | RuvB-like 1                                                                 | 0.799 |       | 0.772 | 2 | 0.786 | 0.019 |
| gi 194385190 | unnamed protein product                                                     |       | 0.658 | 0.913 | 5 | 0.786 | 0.180 |
| gi 5174613   | nucleosome assembly protein 1-like 4                                        | 0.81  | 0.844 | 0.705 | 2 | 0.786 | 0.072 |
| gi 6755901   | tubulin, alpha 1                                                            | 0.865 | 0.781 | 0.714 | 2 | 0.787 | 0.076 |
| gi 119612312 | hCG2008737                                                                  | 0.73  | 0.831 | 0.806 | 3 | 0.789 | 0.053 |
| gi 9755861   | human leucocyte antigen                                                     | 0.77  | 0.746 | 0.852 | 1 | 0.789 | 0.056 |
| gi 88900491  | alpha glucosidase II alpha subunit isoform 3                                | 0.805 | 0.733 | 0.831 | 5 | 0.790 | 0.051 |
| gi 4503529   | eukaryotic translation initiation factor 4A isoform 1                       | 0.859 | 0.715 | 0.796 | 5 | 0.790 | 0.072 |
| gi 4502599   | carbonyl reductase 1                                                        | 0.639 | 0.86  | 0.876 | 3 | 0.792 | 0.132 |
| gi 36036     | GTPase                                                                      | 0.826 | 0.708 | 0.85  | 2 | 0.795 | 0.076 |
| gi 28416956  | GTPase, IMAP family member 8                                                | 0.826 | 0.708 | 0.85  | 2 | 0.795 | 0.076 |
| gi 11513833  | Chain B, Core Of The Alu Domain Of The Mammalian Srp                        | 0.75  | 0.766 | 0.87  | 2 | 0.795 | 0.065 |
| gi 89573879  | ribosomal protein L18                                                       | 0.726 | 0.942 | 0.719 | 1 | 0.796 | 0.127 |
| gi 119572747 | ribosomal protein L18, isoform CRA_d                                        | 0.726 | 0.942 | 0.719 | 1 | 0.796 | 0.127 |
| gi 194374113 | unnamed protein product                                                     | 0.734 | 0.769 | 0.888 | 1 | 0.797 | 0.081 |
| gi 347964    | TARBP-b gene product                                                        | 0.831 | 0.831 | 0.73  | 2 | 0.797 | 0.058 |
| gi 197304951 | Chain B, Dopamine Quinone Conjugation To Dj-1                               | 0.711 | 0.845 | 0.841 | 5 | 0.799 | 0.076 |
| gi 5174447   | guanine nucleotide binding protein, beta polypeptide 2-like 1               | 0.686 | 0.841 | 0.871 | 4 | 0.799 | 0.099 |
| gi 4759224   | programmed cell death 5                                                     | 0.866 |       | 0.734 | 1 | 0.800 | 0.093 |
| gi 4503535   | eukaryotic translation initiation factor 4E isoform 1                       | 0.865 |       | 0.736 | 2 | 0.801 | 0.091 |
| gi 15277236  | TC4                                                                         | 0.788 | 0.81  | 0.812 | 2 | 0.803 | 0.013 |
| gi 14591909  | ribosomal protein L5                                                        | 0.843 | 0.744 | 0.826 | 3 | 0.804 | 0.053 |
| gi 37258     | Tpr                                                                         | 0.813 | 0.775 | 0.826 | 2 | 0.805 | 0.027 |
| gi 47123412  | RPLP0 protein                                                               | 0.76  | 0.923 | 0.734 | 5 | 0.806 | 0.102 |
| gi 194388520 | unnamed protein product                                                     |       | 0.886 | 0.726 | 1 | 0.806 | 0.113 |
| gi 4504041   | guanine nucleotide binding protein, alpha inhibiting activity polypeptide 2 | 0.878 | 0.846 | 0.697 | 4 | 0.807 | 0.097 |
| gi 404722    | guanine nucleotide regulatory protein                                       | 0.878 | 0.846 | 0.697 | 1 | 0.807 | 0.097 |
| gi 119593150 | filamin A, alpha (actin binding protein 280), isoform CRA_a                 | 0.597 | 0.902 | 0.923 | 5 | 0.807 | 0.182 |
| gi 4506667   | ribosomal protein P0                                                        | 0.76  | 0.923 | 0.742 | 5 | 0.808 | 0.100 |
| gi 194388444 | unnamed protein product                                                     |       | 0.859 | 0.763 | 2 | 0.811 | 0.068 |
| gi 10835067  | autoantigen La                                                              | 0.843 | 0.826 | 0.767 | 5 | 0.812 | 0.040 |
| gi 119575628 | hCG2043275                                                                  | 0.77  | 0.716 | 0.951 | 2 | 0.812 | 0.123 |
| gi 119593154 | filamin A, alpha (actin binding protein 280), isoform CRA_e                 | 0.597 | 0.902 | 0.94  | 5 | 0.813 | 0.188 |
| gi 16876910  | HNRPF protein                                                               | 0.761 | 0.866 | 0.812 | 5 | 0.813 | 0.053 |
| gi 181965    | elongation factor 1 alpha                                                   |       | 0.897 | 0.731 | 1 | 0.814 | 0.117 |
| gi 119622042 | hCG37214, isoform CRA_a                                                     | 0.809 | 0.81  | 0.826 | 1 | 0.815 | 0.010 |
| gi 34783731  | AQR protein                                                                 | 0.774 | 0.739 | 0.937 | 2 | 0.817 | 0.106 |
| gi 2697005   | cell cycle protein p38-2G4 homolog                                          | 0.792 | 0.783 | 0.876 | 3 | 0.817 | 0.051 |
| gi 4759158   | small nuclear ribonucleoprotein D2 isoform 1                                | 0.797 | 0.83  | 0.824 | 5 | 0.817 | 0.018 |
| gi 10433717  | unnamed protein product                                                     | 0.831 | 0.815 | 0.813 | 5 | 0.820 | 0.010 |

|              |                                                                                  |       |       |       |   |       |       |
|--------------|----------------------------------------------------------------------------------|-------|-------|-------|---|-------|-------|
| gi 609342    | nucleophosmin-anaplastic lymphoma kinase fusion protein                          | 0.875 | 0.732 | 0.853 | 3 | 0.820 | 0.077 |
| gi 4506697   | ribosomal protein S20                                                            | 0.81  | 0.93  | 0.724 | 5 | 0.821 | 0.103 |
| gi 3721864   | Ste24p                                                                           | 0.932 |       | 0.711 | 1 | 0.822 | 0.156 |
| gi 4503545   | eukaryotic translation initiation factor 5A isoform B                            | 0.757 | 0.821 | 0.889 | 2 | 0.822 | 0.066 |
| gi 2119276   | beta-tubulin (fragment)                                                          | 0.801 | 0.838 | 0.828 | 5 | 0.822 | 0.019 |
| gi 194239729 | eukaryotic translation elongation factor 1 delta isoform 4                       | 0.797 | 0.764 | 0.907 | 5 | 0.823 | 0.075 |
| gi 7106439   | tubulin, beta 5                                                                  | 0.801 | 0.838 | 0.829 | 5 | 0.823 | 0.019 |
| gi 3929617   | alpha SNAP                                                                       | 0.805 | 0.821 | 0.846 | 3 | 0.824 | 0.021 |
| gi 4557241   | actinin, alpha 3                                                                 | 0.868 | 0.884 | 0.722 | 3 | 0.825 | 0.089 |
| gi 51873036  | oxoglutarate (alpha-ketoglutarate) dehydrogenase (lipoamide) isoform 1 precursor | 0.89  | 0.92  | 0.668 | 1 | 0.826 | 0.138 |
| gi 4389379   | Chain A, Cdc42hs-Gdp Complex                                                     | 0.888 | 0.942 | 0.651 | 1 | 0.827 | 0.155 |
| gi 14165469  | ribosomal protein S15a                                                           | 0.763 | 0.795 | 0.928 | 5 | 0.829 | 0.088 |
| gi 7705813   | ribosomal protein L26-like 1                                                     | 0.774 | 0.826 | 0.886 | 5 | 0.829 | 0.056 |
| gi 12655179  | Dipeptidyl-peptidase 3                                                           | 0.875 | 0.987 | 0.626 | 3 | 0.829 | 0.185 |
| gi 41393545  | RAB5C, member RAS oncogene family isoform b                                      | 0.798 | 0.821 | 0.87  | 5 | 0.830 | 0.037 |
| gi 6912634   | ribosomal protein L13a                                                           | 0.82  | 1.048 | 0.621 | 2 | 0.830 | 0.214 |
| gi 30582781  | tubulin, beta, 4                                                                 | 0.864 | 0.838 | 0.788 | 3 | 0.830 | 0.039 |
| gi 4758118   | death-associated protein 3                                                       | 0.791 | 0.982 | 0.718 | 1 | 0.830 | 0.136 |
| gi 180663    | c-myc binding protein                                                            | 0.749 | 0.809 | 0.934 | 2 | 0.831 | 0.094 |
| gi 169170622 | hypothetical protein                                                             | 0.952 | 0.946 | 0.594 | 4 | 0.831 | 0.205 |
| gi 4929854   | Chain A, Structure Of Human Placental S-Adenosylhomocysteine Hydrolase           | 0.727 | 0.677 | 1.089 | 3 | 0.831 | 0.225 |
| gi 119609848 | splicing factor, arginine/serine-rich 2, isoform CRA_c                           | 0.914 |       | 0.75  | 5 | 0.832 | 0.116 |
| gi 38455427  | chaperonin containing TCP1, subunit 4 (delta)                                    | 0.809 | 0.728 | 0.96  | 2 | 0.832 | 0.118 |
| gi 73959145  | 40S ribosomal protein S2 isoform 4                                               | 0.987 | 0.791 | 0.719 | 1 | 0.832 | 0.139 |
| gi 33341692  | FP585                                                                            | 0.993 |       | 0.674 | 3 | 0.834 | 0.226 |
| gi 83318444  | HSP90AA1 protein                                                                 | 0.742 | 0.996 | 0.764 | 2 | 0.834 | 0.141 |
| gi 4758340   | phenylalanyl-tRNA synthetase, alpha subunit                                      |       | 0.84  | 0.828 | 2 | 0.834 | 0.008 |
| gi 119615473 | ribosomal protein L11, isoform CRA_a                                             | 0.875 | 0.847 | 0.783 | 3 | 0.835 | 0.047 |
| gi 5454002   | putative c-Myc-responsive isoform 1                                              | 0.885 |       | 0.785 | 2 | 0.835 | 0.071 |
| gi 119605048 | ribosomal protein L18a, isoform CRA_b                                            | 0.774 | 0.762 | 0.97  | 3 | 0.835 | 0.117 |
| gi 6755368   | ribosomal protein S18                                                            | 0.908 | 0.673 | 0.925 | 5 | 0.835 | 0.141 |
| gi 641958    | non-muscle myosin B                                                              | 0.826 | 0.812 | 0.869 | 2 | 0.836 | 0.030 |
| gi 33869643  | EEF2 protein                                                                     | 0.78  | 0.82  | 0.907 | 5 | 0.836 | 0.065 |
| gi 31615803  | Chain A, Synthetic Ubiquitin With Fluoro-Leu At 50 And 67                        | 0.795 | 0.851 | 0.863 | 2 | 0.836 | 0.036 |
| gi 3126984   | CAG-isl 7                                                                        | 0.862 | 0.873 | 0.774 | 1 | 0.836 | 0.054 |
| gi 4506597   | ribosomal protein L12                                                            | 0.777 | 0.819 | 0.913 | 5 | 0.836 | 0.070 |
| gi 4502891   | chloride channel, nucleotide-sensitive, 1A                                       | 0.894 | 0.706 | 0.909 | 1 | 0.836 | 0.113 |
| gi 971270    | proteasome subunit p40 / Mov34 protein                                           | 0.821 | 0.905 | 0.784 | 2 | 0.837 | 0.062 |
| gi 10434147  | unnamed protein product                                                          | 0.88  | 0.859 | 0.776 | 3 | 0.838 | 0.055 |
| gi 113420096 | hCG1994130                                                                       | 0.763 | 0.826 | 0.928 | 3 | 0.839 | 0.083 |
| gi 11128019  | cytochrome c                                                                     | 0.879 | 0.882 | 0.76  | 2 | 0.840 | 0.070 |

|              |                                                                                        |       |       |       |   |       |       |
|--------------|----------------------------------------------------------------------------------------|-------|-------|-------|---|-------|-------|
| gi 292435    | ribosomal protein L26                                                                  | 0.756 | 0.826 | 0.941 | 5 | 0.841 | 0.093 |
| gi 4757880   | budding uninhibited by benzimidazoles 3 isoform a                                      | 0.799 | 0.954 | 0.77  | 4 | 0.841 | 0.099 |
| gi 112490659 | Chain A, Structure Of U2af65 Variant With Polyuridine Tract                            | 0.817 | 0.858 | 0.849 | 1 | 0.841 | 0.022 |
| gi 927065    | eukaryotic translation elongation factor 1 alpha 1-like 14                             | 0.789 | 0.827 | 0.909 | 3 | 0.842 | 0.061 |
| gi 21750187  | unnamed protein product                                                                | 0.874 | 0.867 | 0.784 | 5 | 0.842 | 0.050 |
| gi 2736256   | aflatoxin aldehyde reductase AFAR                                                      | 0.815 | 0.889 | 0.824 | 5 | 0.843 | 0.040 |
| gi 119609240 | potassium voltage-gated channel, shaker-related subfamily, member 6                    | 1.043 | 0.693 | 0.793 | 1 | 0.843 | 0.180 |
| gi 33874520  | SYNCRIP protein                                                                        | 0.875 | 0.875 | 0.78  | 2 | 0.843 | 0.055 |
| gi 263098    | Tat binding protein 1, TBP-1=transcriptional activator                                 | 0.903 | 0.748 | 0.881 | 2 | 0.844 | 0.084 |
| gi 169171114 | hypothetical protein                                                                   | 0.989 | 0.827 | 0.717 | 4 | 0.844 | 0.137 |
| gi 15010550  | heat shock protein gp96 precursor                                                      | 0.819 | 0.877 | 0.838 | 5 | 0.845 | 0.030 |
| gi 4432750   | ribosomal protein L11                                                                  | 0.866 | 0.833 | 0.836 | 1 | 0.845 | 0.018 |
| gi 338039    | set                                                                                    | 0.85  | 0.897 | 0.789 | 2 | 0.845 | 0.054 |
| gi 4503253   | defender against cell death 1                                                          | 0.903 | 0.873 | 0.762 | 1 | 0.846 | 0.074 |
| gi 10835256  | PYD and CARD domain containing isoform a                                               | 0.865 | 0.85  | 0.825 | 4 | 0.847 | 0.020 |
| gi 2627129   | polyubiquitin                                                                          | 0.844 | 0.834 | 0.863 | 2 | 0.847 | 0.015 |
| gi 57999481  | hypothetical protein                                                                   | 1.009 | 0.661 | 0.871 | 2 | 0.847 | 0.175 |
| gi 35068     | Nm23 protein                                                                           | 0.837 | 0.847 | 0.859 | 2 | 0.848 | 0.011 |
| gi 799177    | 100 kDa coactivator                                                                    | 0.826 | 0.776 | 0.942 | 5 | 0.848 | 0.085 |
| gi 7765076   | S3 ribosomal protein                                                                   | 0.971 |       | 0.726 | 5 | 0.849 | 0.173 |
| gi 7710086   | RAB10, member RAS oncogene family                                                      | 0.837 | 0.794 | 0.915 | 5 | 0.849 | 0.061 |
| gi 1944352   | IgG Fc binding protein                                                                 |       | 0.886 | 0.812 | 2 | 0.849 | 0.052 |
| gi 5690431   | prefoldin subunit 2                                                                    | 0.926 | 0.725 | 0.897 | 1 | 0.849 | 0.109 |
| gi 32358     | hnRNP U protein                                                                        | 0.837 | 0.953 | 0.76  | 3 | 0.850 | 0.097 |
| gi 170785039 | Chain A, The Crystal Structure Of P18, Human Translation Elongation Factor 1 Epsilon 1 | 0.759 | 0.954 | 0.839 | 3 | 0.851 | 0.098 |
| gi 35830     | ubiquitin activating enzyme E1                                                         | 0.896 | 0.844 | 0.822 | 5 | 0.854 | 0.038 |
| gi 4261795   | eukaryotic initiation factor 5A                                                        |       | 1     | 0.708 | 1 | 0.854 | 0.206 |
| gi 4758774   | NADH dehydrogenase (ubiquinone) 1 beta subcomplex, 10, 22kDa                           | 0.755 |       | 0.954 | 2 | 0.855 | 0.141 |
| gi 4884343   | hypothetical protein                                                                   | 0.865 |       | 0.844 | 1 | 0.855 | 0.015 |
| gi 825671    | B23 nucleophosmin (280 AA)                                                             | 0.79  | 0.877 | 0.897 | 5 | 0.855 | 0.057 |
| gi 35431     | unnamed protein product                                                                | 0.869 | 0.898 | 0.798 | 2 | 0.855 | 0.051 |
| gi 18104989  | protein tyrosine phosphatase, non-receptor type 6 isoform 1                            | 0.851 | 0.934 | 0.78  | 3 | 0.855 | 0.077 |
| gi 603074    | ATP:citrate lyase                                                                      | 0.867 | 0.67  | 1.03  | 1 | 0.856 | 0.180 |
| gi 4507793   | ubiquitin-conjugating enzyme E2N                                                       | 0.892 | 0.965 | 0.715 | 2 | 0.857 | 0.129 |
| gi 338043    | Human pre-mRNA splicing factor SF2p32, complete sequence.                              | 0.93  |       | 0.785 | 2 | 0.858 | 0.103 |
| gi 1263196   | AICAR formyltransferase/IMP cyclohydrolase bifunctional enzyme                         | 0.853 | 0.919 | 0.801 | 5 | 0.858 | 0.059 |
| gi 5107637   | Chain C, Structure Of The Karyopherin Beta2-Ran Gppnhp Nuclear Transport Complex       | 0.877 | 0.886 | 0.81  | 5 | 0.858 | 0.042 |
| gi 4885287   | guanine nucleotide binding protein (G protein), gamma 5                                | 0.878 | 0.846 | 0.849 | 3 | 0.858 | 0.018 |
| gi 190447    | prosome protein P30-33K                                                                | 0.886 | 1.044 | 0.643 | 3 | 0.858 | 0.202 |
| gi 32187319  | SHUJUN-1                                                                               | 0.833 | 0.877 | 0.865 | 1 | 0.858 | 0.023 |



|              |                                                                                                                   |       |       |       |   |       |       |
|--------------|-------------------------------------------------------------------------------------------------------------------|-------|-------|-------|---|-------|-------|
| gi 183353    | glycogen phosphorylase (EC 2.4.1.1)                                                                               | 0.76  |       | 0.957 | 2 | 0.859 | 0.139 |
| gi 187281    | M4 protein                                                                                                        | 0.857 | 0.836 | 0.884 | 5 | 0.859 | 0.024 |
| gi 40353734  | nucleophosmin 1 isoform 2                                                                                         | 0.885 | 0.849 | 0.845 | 5 | 0.860 | 0.022 |
| gi 1041969   | 17 kda cyclophilin A {internal fragment}                                                                          | 0.853 | 0.87  | 0.857 | 3 | 0.860 | 0.009 |
| gi 4502171   | adenine phosphoribosyltransferase isoform a                                                                       | 0.897 | 0.855 | 0.828 | 5 | 0.860 | 0.035 |
| gi 4827050   | ubiquitin specific protease 14 isoform a                                                                          | 0.917 | 0.889 | 0.775 | 5 | 0.860 | 0.075 |
| gi 339878    | tripeptidyl peptidase II                                                                                          | 0.921 | 0.749 | 0.913 | 4 | 0.861 | 0.097 |
| gi 114606879 | ribosomal protein isoform 2                                                                                       | 0.866 | 0.905 | 0.813 | 3 | 0.861 | 0.046 |
| gi 4506613   | ribosomal protein L22 proprotein                                                                                  | 0.826 | 0.75  | 1.009 | 2 | 0.862 | 0.133 |
| gi 114572020 | small nuclear ribonucleic protein isoform 2                                                                       |       | 0.872 | 0.852 | 1 | 0.862 | 0.014 |
| gi 495126    | ribosomal protein L11                                                                                             | 0.766 | 0.975 | 0.845 | 3 | 0.862 | 0.106 |
| gi 531171    | Csa-19                                                                                                            | 0.719 | 0.834 | 1.036 | 5 | 0.863 | 0.160 |
| gi 292160    | heat shock protein 70                                                                                             | 0.865 | 0.772 | 0.952 | 1 | 0.863 | 0.090 |
| gi 5453539   | phosphoribosylaminoimidazole carboxylase,<br>phosphoribosylaminoimidazole succinocarboxamide synthetase isoform 2 | 0.805 | 0.847 | 0.937 | 5 | 0.863 | 0.067 |
| gi 4501867   | aconitase 2 precursor                                                                                             | 0.887 | 0.913 | 0.79  | 5 | 0.863 | 0.065 |
| gi 5174529   | methionine adenosyltransferase II, alpha                                                                          | 0.719 | 0.851 | 1.022 | 2 | 0.864 | 0.152 |
| gi 5031755   | heterogeneous nuclear ribonucleoprotein R isoform 2                                                               | 0.861 | 0.973 | 0.764 | 3 | 0.866 | 0.105 |
| gi 126030593 | Chain A, Crystal Structure Of Human Paics, A Bifunctional Carboxylase<br>And Synthetase In Purine Biosynthesis    | 0.805 | 0.847 | 0.948 | 5 | 0.867 | 0.074 |
| gi 119620390 | chaperonin containing TCP1, subunit 4 (delta), isoform CRA_a                                                      | 0.809 | 0.831 | 0.96  | 2 | 0.867 | 0.082 |
| gi 5031512   | NSAP1 protein                                                                                                     | 0.841 | 0.859 | 0.9   | 2 | 0.867 | 0.030 |
| gi 7341255   | brain acetylcholinesterase putative membrane anchor                                                               | 0.83  | 0.94  | 0.831 | 2 | 0.867 | 0.063 |
| gi 159162145 | Chain A, Rotamer Strain As A Determinant Of Protein Structural<br>Specificity                                     | 0.911 | 0.828 | 0.863 | 2 | 0.867 | 0.042 |
| gi 63055057  | actin, beta-like 2                                                                                                | 0.878 | 0.827 | 0.897 | 5 | 0.867 | 0.036 |
| gi 119570260 | hCG1642531                                                                                                        | 0.757 | 0.811 | 1.036 | 3 | 0.868 | 0.148 |
| gi 6677809   | ribosomal protein S6                                                                                              | 0.921 | 0.879 | 0.804 | 3 | 0.868 | 0.059 |
| gi 57209813  | tubulin, beta                                                                                                     | 0.825 |       | 0.912 | 3 | 0.869 | 0.062 |
| gi 119619571 | proteasome (prosome, macropain) subunit, alpha type, 4, isoform<br>CRA_b                                          | 0.921 | 0.932 | 0.756 | 2 | 0.870 | 0.099 |
| gi 24485     | unnamed protein product                                                                                           | 0.869 | 1.02  | 0.723 | 2 | 0.871 | 0.149 |
| gi 56204904  | synaptotagmin binding, cytoplasmic RNA interacting protein                                                        | 0.861 | 0.973 | 0.78  | 2 | 0.871 | 0.097 |
| gi 158259895 | unnamed protein product                                                                                           | 0.819 | 0.931 | 0.865 | 3 | 0.872 | 0.056 |
| gi 7739447   | hnRNP 2H9D                                                                                                        | 0.925 | 0.803 | 0.887 | 1 | 0.872 | 0.062 |
| gi 4506723   | ribosomal protein S3a                                                                                             |       | 0.953 | 0.792 | 5 | 0.873 | 0.114 |
| gi 4506185   | proteasome alpha 4 subunit isoform 1                                                                              | 0.958 | 0.923 | 0.739 | 2 | 0.873 | 0.118 |
| gi 40807091  | GANAB protein                                                                                                     | 0.924 |       | 0.823 | 5 | 0.874 | 0.071 |
| gi 119592221 | ribosomal protein S4, X-linked, isoform CRA_a                                                                     |       | 0.863 | 0.884 | 3 | 0.874 | 0.015 |
| gi 25777600  | proteasome 26S non-ATPase subunit 1                                                                               | 0.941 | 0.904 | 0.778 | 1 | 0.874 | 0.085 |
| gi 4826659   | F-actin capping protein beta subunit                                                                              | 0.992 | 0.924 | 0.708 | 3 | 0.875 | 0.148 |
| gi 33875631  | ANP32A protein                                                                                                    | 0.847 | 0.971 | 0.806 | 3 | 0.875 | 0.086 |

|              |                                                                                                                     |       |       |       |   |       |       |
|--------------|---------------------------------------------------------------------------------------------------------------------|-------|-------|-------|---|-------|-------|
| gi 5174735   | tubulin, beta, 2                                                                                                    | 0.864 | 0.838 | 0.922 | 5 | 0.875 | 0.043 |
| gi 221040138 | unnamed protein product                                                                                             | 0.883 | 0.804 | 0.938 | 3 | 0.875 | 0.067 |
| gi 904032    | p48                                                                                                                 | 0.895 | 0.886 | 0.845 | 5 | 0.875 | 0.027 |
| gi 4505585   | platelet-activating factor acetylhydrolase, isoform Ib, beta subunit                                                | 0.88  | 0.844 | 0.903 | 2 | 0.876 | 0.030 |
| gi 4503483   | eukaryotic translation elongation factor 2                                                                          | 0.862 | 0.811 | 0.956 | 5 | 0.876 | 0.074 |
| gi 79160090  | NME1-NME2 protein                                                                                                   | 0.909 | 0.877 | 0.844 | 3 | 0.877 | 0.033 |
| gi 169213772 | actin alpha 1 skeletal muscle protein                                                                               | 0.946 | 0.963 | 0.723 | 1 | 0.877 | 0.134 |
| gi 150261226 | Chain B, Crystal Structure Of Human Gins Complex                                                                    | 0.774 | 0.923 | 0.937 | 3 | 0.878 | 0.090 |
| gi 4758416   | golgi-specific brefeldin A resistant guanine nucleotide exchange factor 1                                           | 0.774 | 0.923 | 0.937 | 5 | 0.878 | 0.090 |
| gi 169165130 | predicted protein                                                                                                   | 0.774 | 0.923 | 0.937 | 2 | 0.878 | 0.090 |
| gi 5106785   | HSPC027                                                                                                             | 0.855 | 0.843 | 0.937 | 5 | 0.878 | 0.051 |
| gi 2981743   | Chain A, Secypa Complexed With Hagpia (Pseudo-Symmetric Monomer)                                                    | 0.97  | 0.831 | 0.835 | 5 | 0.879 | 0.079 |
| gi 190238    | nucleolar phosphoprotein B23                                                                                        | 0.798 | 1.028 | 0.811 | 5 | 0.879 | 0.129 |
| gi 37928159  | Chain A, X-Ray Structure Of Human Nucleoside Diphosphate Kinase A Complexed With Adp At 2 A Resolution              | 0.817 | 0.873 | 0.95  | 3 | 0.880 | 0.067 |
| gi 4503327   | cytochrome b5 reductase isoform m                                                                                   | 0.907 | 0.801 | 0.932 | 1 | 0.880 | 0.070 |
| gi 6841170   | HSPC260                                                                                                             | 0.857 | 0.906 | 0.878 | 2 | 0.880 | 0.025 |
| gi 40788877  | KIAA0139                                                                                                            | 0.737 | 0.945 | 0.961 | 5 | 0.881 | 0.125 |
| gi 60552225  | SHMT2 protein                                                                                                       | 0.97  | 0.795 | 0.88  | 3 | 0.882 | 0.088 |
| gi 5901922   | cell division cycle 37 protein                                                                                      | 0.967 | 0.621 | 1.059 | 1 | 0.882 | 0.231 |
| gi 119587078 | hCG1983504, isoform CRA_f                                                                                           | 0.801 | 0.838 | 1.009 | 3 | 0.883 | 0.111 |
| gi 7020147   | unnamed protein product                                                                                             | 0.736 | 0.961 | 0.952 | 1 | 0.883 | 0.127 |
| gi 58761496  | heterogeneous nuclear ribonucleoprotein A1-like                                                                     | 0.875 |       | 0.891 | 3 | 0.883 | 0.011 |
| gi 6714232   | lymphocyte antigen                                                                                                  | 0.77  | 1.028 | 0.852 | 1 | 0.883 | 0.132 |
| gi 31418053  | CCT8 protein                                                                                                        | 0.847 | 0.943 | 0.861 | 5 | 0.884 | 0.052 |
| gi 4826760   | heterogeneous nuclear ribonucleoprotein F                                                                           | 0.805 | 0.855 | 0.992 | 5 | 0.884 | 0.097 |
| gi 5453603   | chaperonin containing TCP1, subunit 2                                                                               | 0.879 | 1.106 | 0.668 | 5 | 0.884 | 0.219 |
| gi 1905998   | nuclear RNA helicase                                                                                                | 0.992 | 0.921 | 0.742 | 2 | 0.885 | 0.129 |
| gi 119625894 | phosphoribosylaminoimidazole carboxylase, phosphoribosylaminoimidazole succinocarboxamide synthetase, isoform CRA_a | 0.805 | 0.914 | 0.937 | 2 | 0.885 | 0.071 |
| gi 4506607   | ribosomal protein L18                                                                                               | 0.921 | 0.937 | 0.799 | 2 | 0.886 | 0.561 |
| gi 14251209  | chloride intracellular channel 1                                                                                    | 0.903 | 0.867 | 0.889 | 5 | 0.886 | 0.018 |
| gi 7656952   | calcyclin binding protein isoform 1                                                                                 | 0.951 | 1     | 0.708 | 4 | 0.886 | 0.156 |
| gi 4506715   | ribosomal protein S28                                                                                               | 0.717 | 0.928 | 1.015 | 3 | 0.887 | 0.153 |
| gi 2662291   | cytochrome b5                                                                                                       | 0.916 |       | 0.858 | 2 | 0.887 | 0.041 |
| gi 33413400  | esterase D/formylglutathione hydrolase                                                                              | 0.858 | 0.998 | 0.809 | 8 | 0.888 | 0.098 |
| gi 36142     | ribosomal protein homologous to yeast S24                                                                           | 0.766 | 0.918 | 0.982 | 1 | 0.889 | 0.111 |
| gi 6841532   | HSPC155                                                                                                             | 0.886 | 0.901 | 0.884 | 1 | 0.890 | 0.009 |
| gi 348012    | neutral amino acid transporter                                                                                      | 0.942 | 0.92  | 0.811 | 3 | 0.891 | 0.070 |
| gi 9836652   | BSCv                                                                                                                | 0.892 |       | 0.891 | 1 | 0.892 | 0.001 |

|              |                                                                                            |       |       |       |   |       |       |
|--------------|--------------------------------------------------------------------------------------------|-------|-------|-------|---|-------|-------|
| gi 9845297   | diablo isoform 1 precursor                                                                 | 0.82  | 0.866 | 0.99  | 2 | 0.892 | 0.088 |
| gi 36038     | rho GDP dissociation inhibitor (GDI)                                                       | 0.8   | 0.918 | 0.96  | 2 | 0.893 | 0.083 |
| gi 763130    | YPT3                                                                                       | 0.964 | 0.913 | 0.801 | 5 | 0.893 | 0.083 |
| gi 4506675   | ribophorin I precursor                                                                     | 0.96  | 0.848 | 0.871 | 2 | 0.893 | 0.059 |
| gi 119618535 | hCG2016250, isoform CRA_d                                                                  | 1.006 |       | 0.78  | 2 | 0.893 | 0.160 |
| gi 38014635  | SFPQ protein                                                                               | 0.878 | 0.9   | 0.904 | 5 | 0.894 | 0.014 |
| gi 10441901  | unknown                                                                                    | 0.837 | 0.794 | 1.053 | 2 | 0.895 | 0.139 |
| gi 34147513  | RAB7, member RAS oncogene family                                                           | 0.911 | 0.917 | 0.856 | 5 | 0.895 | 0.034 |
| gi 15928389  | Unknown (protein for IMAGE:4158571)                                                        | 0.885 | 0.827 | 0.976 | 2 | 0.896 | 0.075 |
| gi 83699649  | heat shock 90kDa protein 1, alpha                                                          | 0.975 | 0.929 | 0.784 | 5 | 0.896 | 0.100 |
| gi 1419567   | dynactin                                                                                   | 0.848 | 0.966 | 0.874 | 1 | 0.896 | 0.062 |
| gi 23879     | 40kDa protein kinase                                                                       | 0.993 | 0.737 | 0.962 | 2 | 0.897 | 0.140 |
| gi 114794171 | Chain A, Crystal Structure Of Rab11 In Complex With Rab11-Fip2                             | 0.777 | 1.168 | 0.748 | 3 | 0.898 | 0.235 |
| gi 32532     | unnamed protein product                                                                    | 0.892 | 0.91  | 0.891 | 5 | 0.898 | 0.011 |
| gi 4501893   | actinin, alpha 2                                                                           | 0.868 | 0.884 | 0.942 | 5 | 0.898 | 0.039 |
| gi 550023    | ribosomal protein S9                                                                       | 0.872 | 0.906 | 0.916 | 5 | 0.898 | 0.023 |
| gi 13097759  | Unknown (protein for IMAGE:3544292)                                                        |       | 0.954 | 0.843 | 5 | 0.899 | 0.078 |
| gi 2246558   | talin-related protein                                                                      | 1.008 | 0.949 | 0.739 | 3 | 0.899 | 0.141 |
| gi 553640    | ribosomal protein S13                                                                      | 1.073 | 0.723 | 0.904 | 1 | 0.900 | 0.175 |
| gi 4588526   | nuclear chloride channel                                                                   | 0.869 | 0.954 | 0.878 | 3 | 0.900 | 0.047 |
| gi 157838211 | Chain A, Human Platelet Profilin Complexed With The L-Pro10 Peptide                        | 0.951 | 0.945 | 0.805 | 5 | 0.900 | 0.083 |
| gi 4929561   | CGI-46 protein                                                                             | 0.913 | 0.882 | 0.908 | 3 | 0.901 | 0.017 |
| gi 4506691   | ribosomal protein S16                                                                      | 0.704 | 1.115 | 0.885 | 5 | 0.901 | 0.206 |
| gi 5454154   | peptidylprolyl isomerase H                                                                 | 0.97  | 0.899 | 0.836 | 5 | 0.902 | 0.067 |
| gi 7706322   | homeobox prox 1                                                                            | 0.895 |       | 0.909 | 1 | 0.902 | 0.010 |
| gi 119577215 | actinin, alpha 4, isoform CRA_c                                                            |       | 0.973 | 0.832 | 5 | 0.903 | 0.100 |
| gi 55958333  | X-prolyl aminopeptidase (aminopeptidase P) 1, soluble                                      | 0.819 | 0.957 | 0.932 | 1 | 0.903 | 0.074 |
| gi 4505999   | protein phosphatase 1G                                                                     | 0.907 | 0.739 | 1.062 | 1 | 0.903 | 0.162 |
| gi 5803225   | tyrosine 3/tryptophan 5 -monooxygenase activation protein, epsilon polypeptide             | 0.793 | 0.967 | 0.949 | 5 | 0.903 | 0.096 |
| gi 75709200  | glutathione peroxidase 4 isoform A precursor                                               | 0.831 |       | 0.975 | 2 | 0.903 | 0.102 |
| gi 21956645  | myotrophin                                                                                 | 0.898 | 0.954 | 0.858 | 1 | 0.903 | 0.048 |
| gi 4757756   | annexin A2 isoform 2                                                                       | 0.927 | 0.737 | 1.047 | 1 | 0.904 | 0.156 |
| gi 4506703   | ribosomal protein S24 isoform c                                                            | 0.804 | 1.019 | 0.891 | 3 | 0.905 | 0.108 |
| gi 119575011 | ribosomal protein S24, isoform CRA_i                                                       | 0.804 | 1.019 | 0.891 | 3 | 0.905 | 0.108 |
| gi 1065361   | Chain A, Human Adp-Ribosylation Factor 1 Complexed With Gdp, Full Length Non-Myristoylated | 0.822 | 0.866 | 1.026 | 1 | 0.905 | 0.107 |
| gi 119616784 | hCG22922                                                                                   | 0.858 | 0.934 | 0.923 | 1 | 0.905 | 0.041 |
| gi 1060888   | human 26S proteasome subunit p97                                                           | 0.811 | 1.04  | 0.867 | 5 | 0.906 | 0.119 |
| gi 187302    | epithelial cell marker protein 1                                                           | 0.834 | 0.958 | 0.928 | 5 | 0.907 | 0.065 |
| gi 74762505  | Protein FAM10A4                                                                            | 0.94  | 1.074 | 0.706 | 2 | 0.907 | 0.186 |
| gi 4502303   | mitochondrial ATP synthase, O subunit precursor                                            | 0.78  | 0.858 | 1.083 | 3 | 0.907 | 0.157 |

|              |                                                                                                                          |       |       |       |   |       |       |
|--------------|--------------------------------------------------------------------------------------------------------------------------|-------|-------|-------|---|-------|-------|
| gi 83674986  | rcTPM3                                                                                                                   | 0.857 | 0.865 | 1.002 | 5 | 0.908 | 0.082 |
| gi 21104402  | IMR-90 ribosomal protein S3                                                                                              | 0.914 | 0.905 | 0.906 | 5 | 0.908 | 0.005 |
| gi 5803187   | transaldolase 1                                                                                                          | 0.884 | 1.051 | 0.793 | 2 | 0.909 | 0.131 |
| gi 35493916  | ribophorin II isoform 1 precursor                                                                                        | 0.95  | 1.056 | 0.723 | 3 | 0.910 | 0.170 |
| gi 2959876   | synaptogyrin 2                                                                                                           | 0.896 | 0.828 | 1.006 | 1 | 0.910 | 0.090 |
| gi 54696890  | tyrosine 3-monooxygenase/tryptophan 5-monooxygenase activation protein, theta polypeptide                                | 0.91  | 0.961 | 0.861 | 5 | 0.911 | 0.050 |
| gi 112490030 | Chain A, Charged And Uncharged Trnas Adopt Distinct Conformations When Complexed With Human Tryptophanyl-Trna Synthetase | 0.837 | 1.06  | 0.838 | 3 | 0.912 | 0.128 |
| gi 4557581   | fatty acid binding protein 5 (psoriasis-associated)                                                                      | 0.762 | 0.869 | 1.105 | 3 | 0.912 | 0.175 |
| gi 551638    | SSR alpha subunit                                                                                                        | 0.985 |       | 0.839 | 1 | 0.912 | 0.103 |
| gi 4506679   | ribosomal protein S10                                                                                                    | 1.014 | 0.834 | 0.888 | 3 | 0.912 | 0.092 |
| gi 4506181   | proteasome alpha 2 subunit                                                                                               | 0.919 | 0.899 | 0.918 | 2 | 0.912 | 0.011 |
| gi 4506743   | ribosomal protein S8                                                                                                     | 0.91  | 0.922 | 0.905 | 5 | 0.912 | 0.009 |
| gi 20149594  | heat shock 90kDa protein 1, beta                                                                                         | 0.943 | 0.923 | 0.871 | 5 | 0.912 | 0.037 |
| gi 32177     | HLA-B27                                                                                                                  | 0.862 |       | 0.966 | 1 | 0.914 | 0.074 |
| gi 1296662   | plectin                                                                                                                  | 0.861 | 0.945 | 0.936 | 3 | 0.914 | 0.046 |
| gi 14110407  | heterogeneous nuclear ribonucleoprotein D-like                                                                           | 0.771 | 0.963 | 1.009 | 3 | 0.914 | 0.126 |
| gi 4507949   | tyrosine 3-monooxygenase/tryptophan 5-monooxygenase activation protein, beta polypeptide                                 | 0.834 | 0.981 | 0.928 | 5 | 0.914 | 0.074 |
| gi 119572749 | ribosomal protein L18, isoform CRA_f                                                                                     | 1.035 | 0.924 | 0.785 | 5 | 0.915 | 0.125 |
| gi 35438     | unnamed protein product                                                                                                  | 0.693 | 0.986 | 1.067 | 5 | 0.915 | 0.197 |
| gi 5454052   | stratifin                                                                                                                | 0.883 | 0.914 | 0.949 | 5 | 0.915 | 0.033 |
| gi 4826898   | profilin 1                                                                                                               | 0.939 | 1.024 | 0.783 | 2 | 0.915 | 0.122 |
| gi 55859728  | CAP, adenylate cyclase-associated protein 1 (yeast)                                                                      | 1.008 | 0.673 | 1.066 | 1 | 0.916 | 0.212 |
| gi 4557361   | BH3 interacting domain death agonist isoform 2                                                                           | 0.824 |       | 1.008 | 2 | 0.916 | 0.130 |
| gi 95113651  | glutaredoxin 3                                                                                                           | 0.984 | 0.928 | 0.836 | 1 | 0.916 | 0.075 |
| gi 1498488   | osteoclast stimulating factor                                                                                            | 0.749 | 0.966 | 1.034 | 3 | 0.916 | 0.149 |
| gi 6110350   | Traf2 and NCK interacting kinase, splice variant 2                                                                       | 0.896 | 0.881 | 0.973 | 2 | 0.917 | 0.049 |
| gi 5453599   | capping protein (actin filament) muscle Z-line, alpha 2                                                                  | 0.924 | 0.869 | 0.957 | 1 | 0.917 | 0.044 |
| gi 4507947   | tyrosyl-tRNA synthetase                                                                                                  | 0.925 | 0.842 | 0.983 | 3 | 0.917 | 0.071 |
| gi 48257056  | TALDO1 protein                                                                                                           | 0.974 | 1.005 | 0.772 | 5 | 0.917 | 0.127 |
| gi 4507785   | ubiquitin-conjugating enzyme E2I                                                                                         | 0.854 | 1.022 | 0.876 | 5 | 0.917 | 0.091 |
| gi 8922331   | mago-nashi homolog B                                                                                                     | 0.884 | 0.929 | 0.94  | 5 | 0.918 | 0.030 |
| gi 24119203  | tropomyosin 3 isoform 2                                                                                                  | 0.936 | 0.865 | 0.952 | 5 | 0.918 | 0.046 |
| gi 4501887   | actin, gamma 1 propeptide                                                                                                | 0.868 | 0.931 | 0.957 | 5 | 0.919 | 0.046 |
| gi 8922699   | CNDP dipeptidase 2                                                                                                       | 0.933 | 0.898 | 0.925 | 4 | 0.919 | 0.018 |
| gi 10834730  | PP856                                                                                                                    | 0.933 | 0.898 | 0.925 | 4 | 0.919 | 0.018 |
| gi 114578542 | Methionine adenosyltransferase II, alpha isoform 4                                                                       | 0.969 | 0.833 | 0.954 | 1 | 0.919 | 0.075 |
| gi 913159    | neuropolypeptide h3                                                                                                      | 0.852 | 0.91  | 0.995 | 5 | 0.919 | 0.072 |
| gi 4506003   | protein phosphatase 1, catalytic subunit, alpha isoform 1                                                                | 0.863 | 0.933 | 0.964 | 3 | 0.920 | 0.052 |
| gi 119620366 | malate dehydrogenase 1, NAD (soluble), isoform CRA_b                                                                     | 0.903 |       | 0.937 | 1 | 0.920 | 0.024 |

|              |                                                                                                                                |       |       |       |   |       |       |
|--------------|--------------------------------------------------------------------------------------------------------------------------------|-------|-------|-------|---|-------|-------|
| gi 729422    | Alpha-enolase, lung specific (2-phospho-D-glycerate hydro-lyase) (Non-neural enolase) (NNE) (Phosphopyruvate hydratase) (HLE1) | 0.92  | 1.039 | 0.802 | 3 | 0.920 | 0.119 |
| gi 4505591   | peroxiredoxin 1                                                                                                                | 0.821 | 0.89  | 1.051 | 5 | 0.921 | 0.118 |
| gi 194375974 | unnamed protein product                                                                                                        | 0.821 | 0.89  | 1.051 | 5 | 0.921 | 0.118 |
| gi 4757768   | Rho GDP dissociation inhibitor (GDI) alpha                                                                                     | 1.048 | 0.907 | 0.807 | 3 | 0.921 | 0.121 |
| gi 58652133  | tropomyosin 3                                                                                                                  | 0.826 | 0.894 | 1.045 | 5 | 0.922 | 0.112 |
| gi 1633054   | Chain A, Cyclophilin A Complexed With Dipeptide Gly-Pro                                                                        | 0.908 | 0.905 | 0.953 | 3 | 0.922 | 0.027 |
| gi 119596301 | tyrosine 3-monooxygenase/tryptophan 5-monooxygenase activation protein, beta polypeptide, isoform CRA_b                        | 0.834 | 0.981 | 0.955 | 5 | 0.923 | 0.078 |
| gi 437363    | 14-3-3n                                                                                                                        | 0.865 | 0.956 | 0.949 | 5 | 0.923 | 0.051 |
| gi 1478281   | neutral amino acid transporter B                                                                                               | 0.907 | 0.884 | 0.98  | 2 | 0.924 | 0.050 |
| gi 194379742 | unnamed protein product                                                                                                        | 0.97  | 1.041 | 0.76  | 1 | 0.924 | 0.146 |
| gi 52545896  | hypothetical protein                                                                                                           | 0.883 | 0.887 | 1.003 | 5 | 0.924 | 0.068 |
| gi 119613432 | hCG20693, isoform CRA_a                                                                                                        | 0.936 | 0.869 | 0.968 | 2 | 0.924 | 0.051 |
| gi 119574084 | guanine nucleotide binding protein (G protein), beta polypeptide 2-like 1, isoform CRA_h                                       | 0.967 | 0.871 | 0.936 | 3 | 0.925 | 0.049 |
| gi 4506381   | ras-related C3 botulinum toxin substrate 2                                                                                     | 0.861 | 0.901 | 1.017 | 5 | 0.926 | 0.081 |
| gi 307383    | RNA helicase A                                                                                                                 | 0.905 | 0.921 | 0.953 | 5 | 0.926 | 0.024 |
| gi 18379349  | vesicle amine transport protein 1                                                                                              | 1.024 | 0.987 | 0.768 | 1 | 0.926 | 0.138 |
| gi 197099116 | signal recognition particle 14kDa                                                                                              | 1.049 | 0.774 | 0.956 | 5 | 0.926 | 0.140 |
| gi 5453595   | adenylyl cyclase-associated protein                                                                                            | 0.971 | 1.035 | 0.774 | 3 | 0.927 | 0.136 |
| gi 119590106 | hCG27371                                                                                                                       | 0.928 | 1.02  | 0.833 | 2 | 0.927 | 0.094 |
| gi 119614893 | splicing factor, arginine/serine-rich 1 (splicing factor 2, alternate splicing factor), isoform CRA_b                          | 0.916 | 0.921 | 0.947 | 5 | 0.928 | 0.017 |
| gi 207080252 | DKFZP468I0328 protein                                                                                                          | 0.928 | 1.024 | 0.833 | 5 | 0.928 | 0.096 |
| gi 546518    | stearoyl-CoA desaturase; delta-9-desaturase                                                                                    | 1.016 |       | 0.841 | 1 | 0.929 | 0.124 |
| gi 23491733  | ribosomal protein S2                                                                                                           | 0.865 | 0.901 | 1.021 | 5 | 0.929 | 0.082 |
| gi 169216555 | hypothetical protein                                                                                                           | 0.989 | 0.827 | 0.972 | 1 | 0.929 | 0.089 |
| gi 119627559 | peptidylprolyl isomerase H (cyclophilin H), isoform CRA_d                                                                      | 1.084 | 0.667 | 1.037 | 2 | 0.929 | 0.228 |
| gi 113404817 | TRIMCyp                                                                                                                        | 1.084 | 0.667 | 1.037 | 3 | 0.929 | 0.228 |
| gi 190359598 | Putative heat shock protein HSP 90-beta 2                                                                                      | 0.924 | 0.925 | 0.941 | 5 | 0.930 | 0.010 |
| gi 13376840  | WD repeat domain 61                                                                                                            | 0.971 |       | 0.891 | 1 | 0.931 | 0.057 |
| gi 693933    | 2-phosphopyruvate-hydratase alpha-enolase; carbonate dehydratase                                                               | 0.794 | 0.942 | 1.058 | 5 | 0.931 | 0.132 |
| gi 4758112   | HLA-B associated transcript 1                                                                                                  | 0.888 | 0.763 | 1.146 | 3 | 0.932 | 0.195 |
| gi 119619008 | phosphoglycerate kinase 1, isoform CRA_a                                                                                       | 0.938 | 0.96  | 0.901 | 2 | 0.933 | 0.030 |
| gi 1008542   | ubiquitin isopeptidase T                                                                                                       | 0.898 | 0.972 | 0.929 | 2 | 0.933 | 0.037 |
| gi 4507181   | sialophorin                                                                                                                    | 0.933 | 0.966 | 0.901 | 5 | 0.933 | 0.033 |
| gi 3157976   | alpha actinin                                                                                                                  | 0.864 | 0.933 | 1.004 | 5 | 0.934 | 0.070 |
| gi 114682581 | p21-Arc isoform 3                                                                                                              | 0.969 | 0.936 | 0.896 | 5 | 0.934 | 0.037 |
| gi 4504169   | glutathione synthetase                                                                                                         | 0.899 | 0.881 | 1.022 | 2 | 0.934 | 0.077 |
| gi 914957    | Ash-m                                                                                                                          | 0.887 | 0.969 | 0.947 | 3 | 0.934 | 0.042 |
| gi 4506695   | ribosomal protein S19                                                                                                          | 0.972 |       | 0.897 | 3 | 0.935 | 0.053 |
| gi 6005842   | proline synthetase co-transcribed homolog                                                                                      |       | 0.893 | 0.977 | 2 | 0.935 | 0.059 |

|              |                                                                                                                                                               |       |       |       |   |       |       |
|--------------|---------------------------------------------------------------------------------------------------------------------------------------------------------------|-------|-------|-------|---|-------|-------|
| gi 4506749   | ribonucleoside-diphosphate reductase M1 chain                                                                                                                 | 1.003 |       | 0.868 | 1 | 0.936 | 0.095 |
| gi 15088795  | phosphatidylinositol glycan anchor biosynthesis, class S                                                                                                      | 1.068 |       | 0.803 | 1 | 0.936 | 0.187 |
| gi 4506183   | proteasome alpha 3 subunit isoform 1                                                                                                                          | 0.857 | 0.983 | 0.967 | 3 | 0.936 | 0.069 |
| gi 8099350   | 33 kDa Vamp-associated protein                                                                                                                                | 0.889 | 0.952 | 0.966 | 1 | 0.936 | 0.041 |
| gi 19923264  | Ras-related protein Rab-27A                                                                                                                                   | 0.939 | 0.908 | 0.961 | 2 | 0.936 | 0.027 |
| gi 119609127 | triosephosphate isomerase 1, isoform CRA_a                                                                                                                    | 0.926 | 1.077 | 0.811 | 2 | 0.938 | 0.133 |
| gi 1421609   | Chain A, X-Ray Structure Of Nm23 Human Nucleoside Diphosphate Kinase B Complexed With Gdp At 2 Angstroms Resolution                                           | 0.837 | 0.906 | 1.072 | 5 | 0.938 | 0.121 |
| gi 48145663  | RPL7                                                                                                                                                          | 1.014 | 0.811 | 0.99  | 5 | 0.938 | 0.111 |
| gi 4507149   | superoxide dismutase 1, soluble                                                                                                                               | 1.033 | 1.075 | 0.709 | 1 | 0.939 | 0.200 |
| gi 558528    | proteasome subunit Y                                                                                                                                          | 0.835 | 0.914 | 1.068 | 4 | 0.939 | 0.118 |
| gi 930063    | neurone-specific enolase                                                                                                                                      | 0.949 | 1.102 | 0.767 | 5 | 0.939 | 0.168 |
| gi 5730031   | secretory carrier membrane protein 2                                                                                                                          | 1.072 | 0.816 | 0.93  | 1 | 0.939 | 0.128 |
| gi 40889610  | Chain A, Crystal Structure Of Human Tryptophanyl-Trna Synthetase                                                                                              | 0.894 | 1.009 | 0.917 | 3 | 0.940 | 0.061 |
| gi 7661922   | RAB21, member RAS oncogene family                                                                                                                             |       | 0.908 | 0.973 | 1 | 0.941 | 0.046 |
| gi 4507797   | ubiquitin-conjugating enzyme E2v2                                                                                                                             | 0.989 | 0.962 | 0.871 | 3 | 0.941 | 0.062 |
| gi 306553    | ribosomal protein small subunit                                                                                                                               | 0.893 | 0.84  | 1.091 | 2 | 0.941 | 0.132 |
| gi 5730023   | RuvB-like 2                                                                                                                                                   | 0.98  | 0.948 | 0.897 | 3 | 0.942 | 0.042 |
| gi 12653279  | ACAT2 protein                                                                                                                                                 | 0.906 | 0.957 | 0.963 | 2 | 0.942 | 0.031 |
| gi 4505257   | moesin                                                                                                                                                        | 0.956 | 0.986 | 0.884 | 5 | 0.942 | 0.052 |
| gi 433308    | capping protein alpha                                                                                                                                         | 0.924 | 0.947 | 0.957 | 2 | 0.943 | 0.017 |
| gi 5453597   | F-actin capping protein alpha-1 subunit                                                                                                                       | 0.924 | 0.947 | 0.957 | 4 | 0.943 | 0.017 |
| gi 4502205   | ADP-ribosylation factor 4                                                                                                                                     | 0.858 | 1.008 | 0.963 | 5 | 0.943 | 0.077 |
| gi 183182    | guanine nucleotide-binding regulatory protein alpha-inhibitory subunit                                                                                        | 0.966 | 0.907 | 0.957 | 2 | 0.943 | 0.032 |
| gi 5031595   | actin related protein 2/3 complex subunit 4 isoform a                                                                                                         | 0.907 | 0.942 | 0.982 | 5 | 0.944 | 0.038 |
| gi 10436409  | unnamed protein product                                                                                                                                       | 0.907 | 0.942 | 0.982 | 5 | 0.944 | 0.038 |
| gi 119590239 | ADP-ribosylation factor 1, isoform CRA_b                                                                                                                      | 0.858 | 1.011 | 0.963 | 3 | 0.944 | 0.078 |
| gi 15431303  | ribosomal protein L9                                                                                                                                          | 0.84  | 0.942 | 1.051 | 4 | 0.944 | 0.106 |
| gi 7018426   | hypothetical protein                                                                                                                                          | 0.952 | 0.946 | 0.935 | 3 | 0.944 | 0.009 |
| gi 2739119   | BAT1                                                                                                                                                          | 0.896 | 0.904 | 1.037 | 4 | 0.946 | 0.079 |
| gi 39645256  | MYH14 protein                                                                                                                                                 | 0.766 |       | 1.126 | 5 | 0.946 | 0.255 |
| gi 494066    | Chain A, Three-Dimensional Structure Of Class Pi Glutathione S-Transferase From Human Placenta In Complex With S-Hexylglutathione At 2.8 Angstroms Resolution | 0.798 | 0.989 | 1.051 | 5 | 0.946 | 0.132 |
| gi 895845    | p64 CLCP                                                                                                                                                      | 1.025 | 1.098 | 0.715 | 1 | 0.946 | 0.203 |
| gi 4826998   | splicing factor proline/glutamine rich (polypyrimidine tract binding protein associated)                                                                      | 0.858 | 0.985 | 0.997 | 2 | 0.947 | 0.077 |
| gi 1871210   | T-complex protein 1, Beta subunit (TCP-1-BETA)                                                                                                                | 0.929 | 0.939 | 0.972 | 1 | 0.947 | 0.023 |
| gi 114651523 | L-plastin isoform 3                                                                                                                                           | 0.989 | 0.902 | 0.95  | 2 | 0.947 | 0.044 |
| gi 9910460   | nitrilase family, member 2                                                                                                                                    | 0.973 | 1.063 | 0.807 | 2 | 0.948 | 0.130 |
| gi 34616     | beta-2 microglobulin                                                                                                                                          | 0.756 | 0.816 | 1.272 | 2 | 0.948 | 0.282 |

|              |                                                                                                |       |       |       |   |       |       |
|--------------|------------------------------------------------------------------------------------------------|-------|-------|-------|---|-------|-------|
| gi 197725116 | Chain A, A Regulatable Switch Mediates Self-Association In An Immunoglobulin Fold              | 0.756 | 0.816 | 1.272 | 4 | 0.948 | 0.282 |
| gi 4505587   | platelet-activating factor acetylhydrolase, isoform Ib, gamma subunit 29kDa                    | 0.907 | 1.177 | 0.76  | 1 | 0.948 | 0.212 |
| gi 5902134   | coronin, actin binding protein, 1A                                                             | 0.889 | 0.953 | 1.003 | 5 | 0.948 | 0.057 |
| gi 9507245   | tyrosine 3-monooxygenase/tryptophan 5-monooxygenase activation protein, gamma polypeptide      | 0.883 | 0.914 | 1.05  | 5 | 0.949 | 0.089 |
| gi 4557032   | L-lactate dehydrogenase B                                                                      | 0.897 | 0.981 | 0.971 | 5 | 0.950 | 0.046 |
| gi 119625804 | moesin, isoform CRA_b                                                                          | 0.871 | 0.963 | 1.022 | 5 | 0.952 | 0.076 |
| gi 1718502   | mitochondrial aconitase                                                                        |       | 0.899 | 1.005 | 2 | 0.952 | 0.075 |
| gi 4507133   | small nuclear ribonucleoprotein polypeptide G                                                  | 0.969 | 0.898 | 0.993 | 3 | 0.953 | 0.049 |
| gi 18466808  | cervical cancer 1 proto-oncogene-binding protein KG19                                          | 0.883 | 1.184 | 0.793 | 1 | 0.953 | 0.205 |
| gi 190875    | ras-like protein                                                                               | 1.002 | 0.883 | 0.976 | 4 | 0.954 | 0.063 |
| gi 4758984   | Ras-related protein Rab-11A                                                                    | 0.803 | 1.023 | 1.036 | 2 | 0.954 | 0.131 |
| gi 438069    | thiol-specific antioxidant protein                                                             | 0.871 | 1.019 | 0.972 | 2 | 0.954 | 0.076 |
| gi 183709    | small G protein                                                                                | 1.002 | 0.885 | 0.976 | 3 | 0.954 | 0.061 |
| gi 4503571   | enolase 1                                                                                      | 0.945 | 0.867 | 1.052 | 5 | 0.955 | 0.093 |
| gi 5822569   | Chain A, Crystal Structure Of Hgstp1-1[v104] Complexed With The Gsh Conjugate Of (+)-Anti-Bpde | 0.798 | 0.989 | 1.08  | 5 | 0.956 | 0.144 |
| gi 7524346   | adenylate kinase 2 isoform b                                                                   | 0.887 | 1.065 | 0.916 | 5 | 0.956 | 0.096 |
| gi 5031593   | actin related protein 2/3 complex subunit 5                                                    | 0.913 | 1     | 0.957 | 3 | 0.957 | 0.044 |
| gi 5453549   | thioredoxin peroxidase                                                                         | 0.9   | 0.965 | 1.006 | 2 | 0.957 | 0.053 |
| gi 4507953   | tyrosine 3/tryptophan 5 -monooxygenase activation protein, zeta polypeptide                    | 0.981 | 0.96  | 0.931 | 5 | 0.957 | 0.025 |
| gi 5803181   | stress-induced-phosphoprotein 1 (Hsp70/Hsp90-organizing protein)                               | 1.025 | 0.897 | 0.952 | 5 | 0.958 | 0.064 |
| gi 7657176   | canopy 2 homolog                                                                               | 0.879 | 0.991 | 1.006 | 5 | 0.959 | 0.069 |
| gi 62897413  | pyruvate kinase 3 isoform 1 variant                                                            | 0.971 | 1.031 | 0.877 | 5 | 0.960 | 0.078 |
| gi 82407989  | Chain A, Crystal Structure Of Human Tyrosine Phosphatase Shp-1                                 | 1.015 | 0.996 | 0.868 | 2 | 0.960 | 0.080 |
| gi 4506193   | proteasome beta 1 subunit                                                                      | 0.861 | 0.899 | 1.12  | 5 | 0.960 | 0.140 |
| gi 511635    | delta3, delta2-enoyl-CoA isomerase                                                             | 1.085 |       | 0.835 |   | 0.960 | 0.177 |
| gi 74739412  | Kappa-actin                                                                                    | 0.985 | 0.978 | 0.918 | 5 | 0.960 | 0.037 |
| gi 2804273   | alpha actinin 4                                                                                | 0.894 | 0.943 | 1.046 | 5 | 0.961 | 0.078 |
| gi 28334     | unnamed protein product                                                                        | 0.871 | 0.966 | 1.047 | 5 | 0.961 | 0.088 |
| gi 5031599   | actin related protein 2/3 complex subunit 2                                                    | 0.98  | 0.97  | 0.935 | 2 | 0.962 | 0.024 |
| gi 825728    | ubiquitin precursor                                                                            | 0.911 | 0.986 | 0.992 | 5 | 0.963 | 0.045 |
| gi 425553    | beta-fodrin                                                                                    | 1.032 | 0.826 | 1.031 | 2 | 0.963 | 0.119 |
| gi 56966036  | Chain A, Three Crystal Structures Of Human Coactosin-Like Protein                              | 0.927 | 1.059 | 0.907 | 5 | 0.964 | 0.083 |
| gi 7705433   | eukaryotic translation initiation factor 3 subunit 6 interacting protein                       | 0.895 |       | 1.034 |   | 0.965 | 0.098 |
| gi 251370    | acid phosphatase isoenzyme Af                                                                  | 1.021 | 1.001 | 0.873 | 5 | 0.965 | 0.080 |
| gi 460789    | transformation upregulated nuclear protein                                                     | 0.925 | 0.777 | 1.193 | 1 | 0.965 | 0.211 |
| gi 221042722 | unnamed protein product                                                                        | 0.848 | 1.036 | 1.013 | 3 | 0.966 | 0.103 |
| gi 4504067   | aspartate aminotransferase 1                                                                   | 1.037 | 1.105 | 0.757 | 3 | 0.966 | 0.184 |
| gi 4505701   | pyridoxal kinase                                                                               | 1.019 | 0.942 | 0.94  | 4 | 0.967 | 0.045 |

|              |                                                                                                                                                                                                              |       |       |       |   |       |       |
|--------------|--------------------------------------------------------------------------------------------------------------------------------------------------------------------------------------------------------------|-------|-------|-------|---|-------|-------|
| gi 1096024   | isoAsp protein carboxyl methyltransferase                                                                                                                                                                    | 1.158 |       | 0.777 | 3 | 0.968 | 0.269 |
| gi 9802306   | DNA-binding protein TAXREB107                                                                                                                                                                                | 0.76  | 1.039 | 1.104 | 3 | 0.968 | 0.183 |
| gi 14625824  | moesin/anaplastic lymphoma kinase fusion protein                                                                                                                                                             | 0.866 | 1.035 | 1.003 | 5 | 0.968 | 0.090 |
| gi 62087548  | L-plastin variant                                                                                                                                                                                            | 0.882 | 1.032 | 0.991 | 2 | 0.968 | 0.078 |
| gi 16758368  | RAB14, member RAS oncogene family                                                                                                                                                                            | 0.995 | 0.966 | 0.954 | 2 | 0.972 | 0.021 |
| gi 5031597   | actin related protein 2/3 complex subunit 3                                                                                                                                                                  | 0.969 | 0.936 | 1.011 | 3 | 0.972 | 0.038 |
| gi 5114051   | HSPC029                                                                                                                                                                                                      |       | 0.891 | 1.053 | 3 | 0.972 | 0.115 |
| gi 4092058   | proteasome subunit HSPC                                                                                                                                                                                      | 0.898 | 0.895 | 1.123 | 5 | 0.972 | 0.131 |
| gi 6005942   | valosin-containing protein                                                                                                                                                                                   | 0.922 | 0.962 | 1.033 | 5 | 0.972 | 0.056 |
| gi 119578807 | valosin-containing protein, isoform CRA_a                                                                                                                                                                    | 0.922 | 0.962 | 1.033 | 2 | 0.972 | 0.056 |
| gi 35505     | pyruvate kinase                                                                                                                                                                                              | 0.971 | 1.031 | 0.915 | 5 | 0.972 | 0.058 |
| gi 194382944 | unnamed protein product                                                                                                                                                                                      | 0.966 |       | 0.979 | 2 | 0.973 | 0.009 |
| gi 4507791   | ubiquitin-conjugating enzyme E2M                                                                                                                                                                             | 0.85  | 0.976 | 1.092 | 5 | 0.973 | 0.121 |
| gi 3095186   | cargo selection protein TIP47                                                                                                                                                                                | 0.978 | 0.95  | 0.99  | 2 | 0.973 | 0.021 |
| gi 119593417 | hCG31916                                                                                                                                                                                                     | 1.175 |       | 0.771 | 2 | 0.973 | 0.286 |
| gi 4507357   | transgelin 2                                                                                                                                                                                                 | 0.824 | 0.823 | 1.277 | 4 | 0.975 | 0.262 |
| gi 221039844 | unnamed protein product                                                                                                                                                                                      | 0.819 | 1.099 | 1.006 | 3 | 0.975 | 0.143 |
| gi 14488680  | Chain A, Crystal Structure Of Human Phosphoglucose IsomeraseNEUROLEUKINAUTOCRINE MOTILITY FACTORMATURATION Factor                                                                                            | 1.012 | 1     | 0.913 | 5 | 0.975 | 0.054 |
| gi 609308    | cytoplasmic chaperonin hTRiC5                                                                                                                                                                                | 0.924 | 1.17  | 0.833 | 1 | 0.976 | 0.174 |
| gi 37492     | alpha-tubulin                                                                                                                                                                                                | 0.968 | 1.016 | 0.943 | 5 | 0.976 | 0.037 |
| gi 312005    | small nuclear ribonucleoprotein E                                                                                                                                                                            |       | 0.971 | 0.982 | 1 | 0.977 | 0.008 |
| gi 178027    | alpha-actin                                                                                                                                                                                                  | 0.682 | 1.193 | 1.055 | 2 | 0.977 | 0.264 |
| gi 157831085 | Chain A, Atomic Structure Of The Rapamycin Human Immunophilin Fkbp- 12 Complex                                                                                                                               | 0.865 | 0.94  | 1.125 | 5 | 0.977 | 0.134 |
| gi 169163387 | peptidyl-Pro cis trans isomerase                                                                                                                                                                             | 0.938 | 0.996 | 0.997 | 1 | 0.977 | 0.034 |
| gi 119594429 | eukaryotic translation elongation factor 1 gamma, isoform CRA_a                                                                                                                                              | 0.977 | 0.998 | 0.956 | 3 | 0.977 | 0.021 |
| gi 4506031   | palmitoyl-protein thioesterase 1 isoform 1 precursor                                                                                                                                                         | 0.917 | 0.93  | 1.085 | 2 | 0.977 | 0.093 |
| gi 114631695 | alpha-smooth muscle actin isoform 2                                                                                                                                                                          | 1.021 | 1.003 | 0.908 | 5 | 0.977 | 0.061 |
| gi 189036    | nonmuscle myosin heavy chain (NMHC)                                                                                                                                                                          | 0.851 |       | 1.105 | 2 | 0.978 | 0.180 |
| gi 825667    | phospholipid hydroperoxide glutathione peroxidase                                                                                                                                                            | 0.851 |       | 1.105 | 2 | 0.978 | 0.180 |
| gi 4505185   | macrophage migration inhibitory factor (glycosylation-inhibiting factor)                                                                                                                                     | 0.89  | 0.962 | 1.082 | 5 | 0.978 | 0.097 |
| gi 999892    | Chain A, Crystal Structure Of Recombinant Human Triosephosphate Isomerase At 2.8 Angstroms Resolution. Triosephosphate Isomerase Related Human Genetic Disorders And Comparison With The Trypanosomal Enzyme | 0.928 | 1.007 | 0.999 | 5 | 0.978 | 0.043 |
| gi 16740986  | FAM49B protein                                                                                                                                                                                               | 1.058 | 0.979 | 0.897 | 5 | 0.978 | 0.081 |
| gi 62088022  | hypothetical protein FLJ41407 variant                                                                                                                                                                        | 1.035 | 0.924 | 0.976 | 2 | 0.978 | 0.056 |
| gi 50514025  | Chain A, Structure Of T70n Human Lysozyme                                                                                                                                                                    | 0.991 | 0.996 | 0.949 | 3 | 0.979 | 0.026 |
| gi 41406084  | glutathione peroxidase 1 isoform 1                                                                                                                                                                           | 0.991 | 0.869 | 1.078 | 3 | 0.979 | 0.105 |



|              |                                                                                                                 |       |       |       |   |       |       |
|--------------|-----------------------------------------------------------------------------------------------------------------|-------|-------|-------|---|-------|-------|
| gi 157835340 | Chain A, Contribution Of Hydrophobic Effect To The Conformational Stability Of Human Lysozyme                   | 0.972 | 0.907 | 1.061 | 5 | 0.980 | 0.077 |
| gi 62896495  | ribosomal protein P0 variant                                                                                    | 1.094 | 0.762 | 1.085 | 3 | 0.980 | 0.189 |
| gi 194388126 | unnamed protein product                                                                                         | 1.094 | 0.762 | 1.085 | 3 | 0.980 | 0.189 |
| gi 46309463  | vitamin K epoxide reductase complex, subunit 1-like 1                                                           | 0.837 | 1.026 | 1.079 | 1 | 0.981 | 0.127 |
| gi 4502013   | adenylate kinase 2 isoform a                                                                                    | 0.887 | 1.065 | 0.992 | 5 | 0.981 | 0.089 |
| gi 119590453 | EDAR-associated death domain, isoform CRA_a                                                                     | 0.994 | 1.029 | 0.921 | 2 | 0.981 | 0.055 |
| gi 193785841 | unnamed protein product                                                                                         | 1.002 | 0.992 | 0.952 | 5 | 0.982 | 0.026 |
| gi 74757451  | Galectin-9C                                                                                                     | 1.041 |       | 0.923 | 2 | 0.982 | 0.083 |
| gi 169161841 | hCG1795719                                                                                                      | 1.041 |       | 0.923 | 1 | 0.982 | 0.083 |
| gi 180637    | L-isoaspartyl/D-aspartyl protein carboxyl methyltransferase                                                     | 1.013 | 0.99  | 0.944 | 5 | 0.982 | 0.035 |
| gi 4506635   | ribosomal protein L32                                                                                           | 1.047 | 0.904 | 0.996 | 1 | 0.982 | 0.072 |
| gi 386758    | GRP78 precursor                                                                                                 | 0.978 | 0.978 | 0.992 | 5 | 0.983 | 0.008 |
| gi 1220311   | elongation factor-1 alpha                                                                                       | 0.911 | 0.829 | 1.209 | 3 | 0.983 | 0.200 |
| gi 10863927  | peptidylprolyl isomerase A                                                                                      | 0.988 | 0.967 | 0.994 | 5 | 0.983 | 0.014 |
| gi 119624305 | splicing factor, arginine/serine-rich 3, isoform CRA_c                                                          | 0.919 | 1.011 | 1.02  | 5 | 0.983 | 0.056 |
| gi 68533125  | ACL1 variant protein                                                                                            | 1.09  | 0.854 | 1.01  | 2 | 0.985 | 0.120 |
| gi 285975    | human rab GDI                                                                                                   | 0.824 | 0.969 | 1.162 | 4 | 0.985 | 0.170 |
| gi 4960030   | Rab GDP dissociation inhibitor beta                                                                             | 0.824 | 0.969 | 1.162 | 3 | 0.985 | 0.170 |
| gi 4504165   | gelsolin isoform a precursor                                                                                    | 0.938 |       | 1.032 | 2 | 0.985 | 0.066 |
| gi 27734452  | Ras-related protein Rab-15                                                                                      | 0.938 | 0.967 | 1.053 | 3 | 0.986 | 0.060 |
| gi 434753    | KIAA0030                                                                                                        | 1.133 |       | 0.839 | 5 | 0.986 | 0.208 |
| gi 60593722  | Chain A, The Crystal Structure Of Human Coactosin-Like Protein At 1.9 A Resolution                              | 0.927 | 1.124 | 0.907 | 5 | 0.986 | 0.120 |
| gi 23272533  | ACTR2 protein                                                                                                   | 0.822 | 1.05  | 1.087 | 3 | 0.986 | 0.144 |
| gi 996057    | gp25l2                                                                                                          | 0.952 | 1.036 | 0.972 | 3 | 0.987 | 0.044 |
| gi 2340104   | Very similar and perhaps identical to Hs-CUL-4B.; 80-100% similarity to partial sequence U58091 (PID:g1381150). | 0.959 | 1.129 | 0.872 | 2 | 0.987 | 0.131 |
| gi 13129092  | transmembrane protein 109                                                                                       | 1.044 | 1.023 | 0.895 | 2 | 0.987 | 0.081 |
| gi 7106387   | proteasome (prosome, macropain) subunit, alpha type 5                                                           | 0.871 | 1.14  | 0.955 | 5 | 0.989 | 0.138 |
| gi 234746    | RAS-related protein MEL                                                                                         | 0.943 | 0.969 | 1.055 | 4 | 0.989 | 0.059 |
| gi 12052930  | hypothetical protein                                                                                            | 1.002 |       | 0.976 | 2 | 0.989 | 0.018 |
| gi 6005854   | prohibitin 2                                                                                                    | 1.074 | 1.159 | 0.738 | 5 | 0.990 | 0.223 |
| gi 1002923   | coronin-like protein                                                                                            | 0.932 | 1.061 | 0.98  | 1 | 0.991 | 0.065 |
| gi 20127454  | 5-aminoimidazole-4-carboxamide ribonucleotide formyltransferase/IMP cyclohydrolase                              | 1.004 | 0.966 | 1.003 | 5 | 0.991 | 0.022 |
| gi 4885281   | glutamate dehydrogenase 1                                                                                       | 0.811 | 1.177 | 0.986 | 3 | 0.991 | 0.183 |
| gi 4502101   | annexin I                                                                                                       | 0.995 | 0.989 | 0.992 | 5 | 0.992 | 0.003 |
| gi 13385872  | interleukin enhancer binding factor 2                                                                           | 0.904 | 1.039 | 1.035 | 2 | 0.993 | 0.077 |
| gi 508285    | Rab5c-like protein, similar to Canis familiaris Rab5c protein, PIR Accession Number S38625                      | 0.933 | 1.177 | 0.868 | 4 | 0.993 | 0.163 |
| gi 6006515   | spliceosomal protein SAP 130                                                                                    | 0.778 | 1.226 | 0.975 | 5 | 0.993 | 0.225 |
| gi 1015321   | alanyl-tRNA synthetase                                                                                          | 0.989 | 1.034 | 0.957 | 5 | 0.993 | 0.039 |

|              |                                                                                                                           |       |       |       |   |       |       |
|--------------|---------------------------------------------------------------------------------------------------------------------------|-------|-------|-------|---|-------|-------|
| gi 67464043  | Chain O, Crsytal Structure Of Human Liver Gapdh                                                                           | 1.095 | 0.82  | 1.065 | 5 | 0.993 | 0.151 |
| gi 5803135   | RAB35, member RAS oncogene family                                                                                         | 0.962 | 0.967 | 1.053 | 3 | 0.994 | 0.051 |
| gi 4507651   | tropomyosin 4 isoform 2                                                                                                   | 0.936 | 0.997 | 1.051 | 5 | 0.995 | 0.058 |
| gi 5531851   | homologous yeast-44.2 protein                                                                                             | 1.056 | 0.89  | 1.04  | 3 | 0.995 | 0.092 |
| gi 31170     | unnamed protein product                                                                                                   | 0.942 | 0.995 | 1.051 | 5 | 0.996 | 0.055 |
| gi 194387964 | unnamed protein product                                                                                                   | 0.971 | 1.031 | 0.986 | 5 | 0.996 | 0.031 |
| gi 38522     | human elongation factor-1-delta                                                                                           | 0.911 | 0.868 | 1.209 | 5 | 0.996 | 0.186 |
| gi 860986    | protein disulfide isomerase                                                                                               | 1.013 | 0.963 | 1.013 | 5 | 0.996 | 0.029 |
| gi 178152    | poly(ADP-ribose) polymerase                                                                                               | 1.156 | 1.045 | 0.789 | 1 | 0.997 | 0.188 |
| gi 2392338   | Chain A, Human Glyoxalase I With Benzyl-Glutathione Inhibitor                                                             | 0.895 | 1.074 | 1.021 | 3 | 0.997 | 0.092 |
| gi 6063143   | ezrin                                                                                                                     | 0.942 | 1.023 | 1.026 | 3 | 0.997 | 0.048 |
| gi 296736    | macropain subunit iota                                                                                                    | 1.002 |       | 0.993 | 5 | 0.998 | 0.006 |
| gi 1218024   | frataxin                                                                                                                  | 1.062 | 0.986 | 0.945 | 1 | 0.998 | 0.059 |
| gi 62087882  | heat shock 70kDa protein 4 isoform a variant                                                                              | 1.212 | 0.755 | 1.026 | 3 | 0.998 | 0.230 |
| gi 31615313  | Chain A, Molecular Mechanism For The Regulation Of Human Mitochondrial Nad(P)+-Dependent Malic Enzyme By Atp And Fumarate | 0.959 | 1.015 | 1.021 | 1 | 0.998 | 0.034 |
| gi 113408761 | hypothetical protein isoform 4                                                                                            | 1.046 |       | 0.951 | 3 | 0.999 | 0.067 |
| gi 6912594   | phosphatidylinositol transfer protein, beta                                                                               | 1.062 | 0.98  | 0.954 | 3 | 0.999 | 0.056 |
| gi 40674640  | IQGAP1 protein                                                                                                            | 1.066 | 0.893 | 1.039 | 5 | 0.999 | 0.093 |
| gi 62420949  | actin-like protein                                                                                                        | 0.931 | 1.006 | 1.062 | 3 | 1.000 | 0.066 |
| gi 119602173 | heat shock protein 90kDa alpha (cytosolic), class A member 1, isoform CRA_b                                               | 0.951 | 1.005 | 1.045 | 3 | 1.000 | 0.047 |
| gi 307375    | multidrug resistance protein                                                                                              | 1.04  |       | 0.961 | 2 | 1.001 | 0.056 |
| gi 28876     | ash protein                                                                                                               | 0.888 | 1.044 | 1.07  | 2 | 1.001 | 0.098 |
| gi 31283     | unnamed protein product                                                                                                   | 0.898 | 1.031 | 1.073 | 5 | 1.001 | 0.091 |
| gi 21465651  | Chain J, Crystal Structure Of The Mammalian 20s Proteasome At 2.75 A Resolution                                           | 0.951 | 1.016 | 1.036 | 3 | 1.001 | 0.044 |
| gi 478813    | nonhistone chromosomal protein HMG-1 - human                                                                              | 0.978 | 0.736 | 1.291 | 5 | 1.002 | 0.278 |
| gi 7634785   | HDCMC29P                                                                                                                  | 1.014 | 0.978 | 1.013 | 3 | 1.002 | 0.021 |
| gi 298588    | tropomyosin, P40 {peak 47}                                                                                                | 0.863 | 1.108 | 1.035 | 1 | 1.002 | 0.126 |
| gi 338695    | beta-tubulin                                                                                                              | 1.169 | 1.006 | 0.831 | 3 | 1.002 | 0.169 |
| gi 72534660  | splicing factor, arginine/serine-rich 7                                                                                   | 0.919 | 1.011 | 1.08  | 5 | 1.003 | 0.081 |
| gi 224052    | transferase,HG phosphoribosyl                                                                                             | 0.932 | 0.979 | 1.099 | 5 | 1.003 | 0.086 |
| gi 6680045   | guanine nucleotide-binding protein, beta-1 subunit                                                                        | 1.133 |       | 0.874 | 2 | 1.004 | 0.183 |
| gi 6694937   | nudix hydrolase NUDT5                                                                                                     | 1.265 | 0.922 | 0.824 | 3 | 1.004 | 0.232 |
| gi 4505753   | phosphoglycerate mutase 1 (brain)                                                                                         | 0.892 | 1.011 | 1.108 | 5 | 1.004 | 0.108 |
| gi 4506681   | ribosomal protein S11                                                                                                     | 1.169 | 0.912 | 0.931 | 5 | 1.004 | 0.143 |
| gi 4507677   | heat shock protein 90kDa beta, member 1                                                                                   | 1.037 | 0.981 | 0.996 | 5 | 1.005 | 0.029 |
| gi 29888     | unnamed protein product                                                                                                   | 1.089 | 0.846 | 1.079 | 3 | 1.005 | 0.138 |
| gi 35959     | tubulin 5-beta                                                                                                            | 1.151 | 0.888 | 0.975 | 5 | 1.005 | 0.134 |
| gi 4506179   | proteasome alpha 1 subunit isoform 2                                                                                      | 0.952 | 1.005 | 1.058 | 5 | 1.005 | 0.053 |
| gi 5825608   | 70 kDa SHP-1L protein                                                                                                     |       | 0.941 | 1.07  | 5 | 1.006 | 0.091 |

|              |                                                                                 |       |       |       |   |       |       |
|--------------|---------------------------------------------------------------------------------|-------|-------|-------|---|-------|-------|
| gi 6912388   | grancalcin, EF-hand calcium binding protein                                     | 1.09  | 0.93  | 0.997 | 5 | 1.006 | 0.080 |
| gi 338443    | beta-spectrin                                                                   | 0.761 | 1.236 | 1.021 | 3 | 1.006 | 0.238 |
| gi 405230    | l-plastin                                                                       | 0.943 | 1.035 | 1.042 | 3 | 1.007 | 0.055 |
| gi 6457378   | cytovillin 2                                                                    | 0.949 | 1.079 | 0.992 | 5 | 1.007 | 0.066 |
| gi 89574029  | mitochondrial ATP synthase, H <sup>+</sup> transporting F1 complex beta subunit | 1.046 | 1.036 | 0.94  | 5 | 1.007 | 0.059 |
| gi 181250    | cyclophilin                                                                     | 0.824 | 0.901 | 1.298 | 5 | 1.008 | 0.254 |
| gi 4335941   | leucine aminopeptidase                                                          | 1.051 | 1.013 | 0.959 | 5 | 1.008 | 0.046 |
| gi 4758440   | glia maturation factor, gamma                                                   | 0.998 | 1.101 | 0.925 | 3 | 1.008 | 0.088 |
| gi 119623396 | RAN binding protein 1, isoform CRA_e                                            | 1.004 | 0.802 | 1.218 | 1 | 1.008 | 0.208 |
| gi 136066    | Triosephosphate isomerase                                                       | 1.01  | 1.008 | 1.006 | 3 | 1.008 | 0.002 |
| gi 226529917 | triosephosphate isomerase 1 isoform 2                                           | 1.01  | 1.013 | 1.002 | 5 | 1.008 | 0.006 |
| gi 532313    | NF45 protein                                                                    | 0.911 | 1.069 | 1.045 | 5 | 1.008 | 0.085 |
| gi 37256     | unnamed protein product                                                         | 0.816 | 1.038 | 1.172 | 2 | 1.009 | 0.180 |
| gi 119582950 | annexin A1, isoform CRA_b                                                       | 0.927 | 1.052 | 1.047 | 5 | 1.009 | 0.071 |
| gi 542850    | heterogeneous nuclear ribonucleoprotein G - human                               | 1.116 | 0.982 | 0.93  | 5 | 1.009 | 0.096 |
| gi 10433073  | unnamed protein product                                                         | 1.055 | 0.984 | 0.99  | 1 | 1.010 | 0.039 |
| gi 31426     | five-lipoxygenase activating protein (FLAP)                                     | 1.002 | 1.025 | 1.003 | 1 | 1.010 | 0.013 |
| gi 4557305   | fructose-bisphosphate aldolase A                                                | 1.019 | 1.064 | 0.948 | 5 | 1.010 | 0.058 |
| gi 203282367 | Chain A, Crystal Structure Of Human Enolase 1                                   | 0.953 | 0.995 | 1.084 | 5 | 1.011 | 0.067 |
| gi 28395033  | ras homolog gene family, member C precursor                                     | 1.064 | 1.018 | 0.951 | 2 | 1.011 | 0.057 |
| gi 7661678   | RAP1B, member of RAS oncogene family                                            | 0.978 | 1.087 | 0.972 | 3 | 1.012 | 0.065 |
| gi 154146191 | heat shock protein 90kDa alpha (cytosolic), class A member 1 isoform 2          | 0.954 | 1.021 | 1.064 | 5 | 1.013 | 0.055 |
| gi 74722491  | Putative heat shock protein HSP 90-beta 4                                       | 0.954 | 1.021 | 1.064 | 5 | 1.013 | 0.055 |
| gi 229532    | ubiquitin                                                                       | 1.026 | 0.943 | 1.071 | 5 | 1.013 | 0.065 |
| gi 67191208  | ubiquitin C                                                                     | 1.026 | 0.943 | 1.071 | 5 | 1.013 | 0.065 |
| gi 194375179 | unnamed protein product                                                         | 0.908 | 1.008 | 1.125 | 5 | 1.014 | 0.109 |
| gi 15620780  | glutamate carboxypeptidase                                                      |       | 0.979 | 1.049 | 2 | 1.014 | 0.049 |
| gi 16507237  | heat shock 70kDa protein 5                                                      | 1.016 | 1.045 | 0.982 | 2 | 1.014 | 0.032 |
| gi 114651555 | L-plastin isoform 2                                                             | 0.983 | 1.02  | 1.042 | 5 | 1.015 | 0.030 |
| gi 13366090  | ribosomal protein L7a                                                           | 1.054 | 1.142 | 0.849 | 2 | 1.015 | 0.150 |
| gi 4503519   | eukaryotic translation initiation factor 3, subunit 5 epsilon, 47kDa            | 1.078 | 1.186 | 0.783 | 1 | 1.016 | 0.209 |
| gi 4758796   | developmentally regulated GTP binding protein 1                                 | 0.782 | 1.236 | 1.031 | 1 | 1.016 | 0.227 |
| gi 73765546  | ubiquitin-conjugating enzyme E2 variant 1 isoform d                             | 0.993 | 1.131 | 0.926 | 5 | 1.017 | 0.105 |
| gi 533693    | mitochondrial glycerol-3-phosphate dehydrogenase                                | 1.112 | 0.873 | 1.066 | 3 | 1.017 | 0.127 |
| gi 22538465  | proteasome beta 3 subunit                                                       | 1.046 | 1.034 | 0.972 | 3 | 1.017 | 0.040 |
| gi 7019485   | programmed cell death 6                                                         | 0.941 | 0.992 | 1.121 | 5 | 1.018 | 0.093 |
| gi 23618867  | sideroflexin 1                                                                  | 1.01  |       | 1.026 | 1 | 1.018 | 0.011 |
| gi 109082737 | heterogeneous nuclear ribonucleoprotein C (C1/C2) isoform 2                     | 0.812 | 1.061 | 1.182 | 5 | 1.018 | 0.189 |
| gi 9188646   | DNA-PKcs                                                                        | 0.908 | 0.95  | 1.197 | 2 | 1.018 | 0.156 |
| gi 189030    | nonmuscle myosin heavy chain-A                                                  | 1.027 | 1.025 | 1.005 | 1 | 1.019 | 0.012 |

|              |                                                                                                                                  |       |       |       |   |       |       |
|--------------|----------------------------------------------------------------------------------------------------------------------------------|-------|-------|-------|---|-------|-------|
| gi 4505595   | serine (or cysteine) proteinase inhibitor, clade B (ovalbumin), member 2                                                         | 1.058 | 1.015 | 0.984 | 3 | 1.019 | 0.037 |
| gi 34740335  | tubulin, alpha 1B                                                                                                                | 0.845 | 1.183 | 1.03  | 5 | 1.019 | 0.169 |
| gi 17389815  | Triosephosphate isomerase 1                                                                                                      | 0.946 | 1.063 | 1.052 | 2 | 1.020 | 0.065 |
| gi 4506195   | proteasome beta 2 subunit                                                                                                        | 1.004 | 0.985 | 1.073 | 3 | 1.021 | 0.046 |
| gi 190613420 | Chain A, Structural Basis Of Human Triosephosphate Isomerase Deficiency. Mutation E104d And Correlation To Solvent Perturbation. | 0.946 | 1.065 | 1.052 | 5 | 1.021 | 0.065 |
| gi 13786129  | RAB33B, member RAS oncogene family                                                                                               | 1.105 | 0.979 | 0.979 | 1 | 1.021 | 0.073 |
| gi 4757900   | calreticulin precursor                                                                                                           | 0.927 | 1.068 | 1.07  | 5 | 1.022 | 0.082 |
| gi 4758012   | clathrin heavy chain 1                                                                                                           | 1.038 | 1.026 | 1.004 | 5 | 1.023 | 0.017 |
| gi 114653233 | Proteasome (prosome, macropain) subunit, alpha type, 3 isoform 1                                                                 | 1.046 | 1.008 | 1.015 | 5 | 1.023 | 0.020 |
| gi 4758988   | RAB1A, member RAS oncogene family isoform 1                                                                                      | 0.964 | 1.054 | 1.053 | 3 | 1.024 | 0.052 |
| gi 56203163  | ubiquitin-conjugating enzyme E2 variant 1                                                                                        | 0.975 | 1.006 | 1.09  | 2 | 1.024 | 0.060 |
| gi 1082886   | tumor necrosis factor type 1 receptor associated protein TRAP-1                                                                  | 0.998 | 0.951 | 1.122 | 2 | 1.024 | 0.088 |
| gi 546901    | cytosolic acetoacetyl-coenzyme A thiolase; CT                                                                                    | 0.958 |       | 1.09  | 1 | 1.024 | 0.093 |
| gi 194373841 | unnamed protein product                                                                                                          | 1.037 | 1.04  | 0.996 | 3 | 1.024 | 0.025 |
| gi 312137    | fructose bisphosphate aldolase                                                                                                   | 1.005 | 1.121 | 0.949 | 5 | 1.025 | 0.088 |
| gi 73948356  | 40S ribosomal protein S16                                                                                                        | 0.964 | 1.038 | 1.075 | 5 | 1.026 | 0.057 |
| gi 33620739  | myosin, light polypeptide 6, alkali, smooth muscle and non-muscle                                                                | 1.1   | 0.943 | 1.034 | 4 | 1.026 | 0.079 |
| gi 6563212   | putative peroxisomal antioxidant enzyme                                                                                          | 1.122 | 1.043 | 0.912 | 5 | 1.026 | 0.106 |
| gi 6678271   | TAR DNA binding protein                                                                                                          | 1.183 | 0.892 | 1.002 | 1 | 1.026 | 0.147 |
| gi 337930    | scar protein                                                                                                                     | 0.795 | 1.035 | 1.251 | 5 | 1.027 | 0.228 |
| gi 119593214 | signal sequence receptor, delta (translocon-associated protein delta), isoform CRA_b                                             | 1.075 | 0.973 | 1.033 | 2 | 1.027 | 0.051 |
| gi 114155144 | tropomyosin 3 isoform 4                                                                                                          | 0.938 | 1.108 | 1.035 | 3 | 1.027 | 0.085 |
| gi 11559925  | X-prolyl aminopeptidase (aminopeptidase P) 3, putative                                                                           | 0.984 | 0.996 | 1.102 | 2 | 1.027 | 0.065 |
| gi 4206368   | placental protein 17a2; PP17a2                                                                                                   | 0.996 | 1.047 | 1.04  | 5 | 1.028 | 0.028 |
| gi 49168498  | TXNRD1                                                                                                                           | 1.125 | 1.011 | 0.948 | 4 | 1.028 | 0.090 |
| gi 13543618  | ATP synthase, H+ transporting, mitochondrial F0 complex, subunit B1                                                              | 1.121 | 1.088 | 0.876 | 3 | 1.028 | 0.133 |
| gi 3660040   | Chain A, F-box mutant F-box complexed with remodeled synthetic ligand                                                            | 1.11  |       | 0.947 | 2 | 1.029 | 0.115 |
| gi 13384630  | stathmin-like 2                                                                                                                  |       | 0.889 | 1.168 | 2 | 1.029 | 0.197 |
| gi 12804891  | TUBB protein                                                                                                                     | 1.093 | 1.162 | 0.831 | 4 | 1.029 | 0.175 |
| gi 473947    | KIAA0115                                                                                                                         | 0.885 | 1.047 | 1.158 | 3 | 1.030 | 0.137 |
| gi 29725611  | protein phosphatase 2A, regulatory subunit B' isoform b                                                                          | 1.11  | 0.75  | 1.23  | 1 | 1.030 | 0.250 |
| gi 3255965   | U5 snRNP-specific 200kD protein                                                                                                  | 1.119 | 1.153 | 0.818 | 2 | 1.030 | 0.184 |
| gi 4758484   | glutathione-S-transferase omega 1                                                                                                | 0.888 | 1.164 | 1.04  | 5 | 1.031 | 0.138 |
| gi 119602776 | GrpE-like 1, mitochondrial (E. coli), isoform CRA_a                                                                              | 0.971 | 1.062 | 1.06  | 5 | 1.031 | 0.052 |
| gi 1339989   | dihydrolipoamide dehydrogenase                                                                                                   | 0.935 | 1.185 | 0.974 | 2 | 1.031 | 0.135 |
| gi 12248755  | mono ATP-binding cassette protein                                                                                                | 1.058 | 1.136 | 0.901 | 3 | 1.032 | 0.120 |
| gi 13569962  | RAB1B, member RAS oncogene family                                                                                                | 0.998 | 1.045 | 1.053 | 3 | 1.032 | 0.030 |
| gi 292059    | MTHSP75                                                                                                                          | 0.982 | 1.004 | 1.112 | 5 | 1.033 | 0.070 |

|              |                                                                                                                                                                                                                                       |       |       |       |   |       |       |
|--------------|---------------------------------------------------------------------------------------------------------------------------------------------------------------------------------------------------------------------------------------|-------|-------|-------|---|-------|-------|
| gi 167614506 | L-plastin                                                                                                                                                                                                                             | 1.003 | 1.098 | 0.999 | 5 | 1.033 | 0.056 |
| gi 221043698 | unnamed protein product                                                                                                                                                                                                               | 0.954 | 1.021 | 1.127 | 5 | 1.034 | 0.087 |
| gi 50593002  | small nuclear ribonucleoprotein polypeptide A'                                                                                                                                                                                        | 0.979 | 1.206 | 0.92  | 3 | 1.035 | 0.151 |
| gi 179106    | nonerythroid alpha-spectrin                                                                                                                                                                                                           | 1.019 | 1.193 | 0.893 | 5 | 1.035 | 0.151 |
| gi 1491714   | rab-related GTP-binding protein                                                                                                                                                                                                       | 1.073 | 0.979 | 1.054 | 1 | 1.035 | 0.050 |
| gi 119612723 | actin, alpha, cardiac muscle, isoform CRA_b                                                                                                                                                                                           | 1.084 | 1.068 | 0.955 | 5 | 1.036 | 0.070 |
| gi 157830335 | Chain A, The Crystal Structure Of The Human Dna Repair Endonuclease Hap1 Suggests The Recognition Of Extra-Helical Deoxyribose At Dna Abasic Sites                                                                                    | 0.92  | 0.831 | 1.357 | 3 | 1.036 | 0.282 |
| gi 40889633  | Chain A, Structure Of Arf1-Gdp Bound To Sec7 Domain Complexed With Brefeldin A                                                                                                                                                        | 1.095 | 0.933 | 1.08  | 5 | 1.036 | 0.090 |
| gi 194382070 | unnamed protein product                                                                                                                                                                                                               | 1.095 | 0.933 | 1.08  | 5 | 1.036 | 0.090 |
| gi 220702506 | Chain A, TapasinERP57 HETERODIMER                                                                                                                                                                                                     | 0.915 | 1.091 | 1.102 | 5 | 1.036 | 0.105 |
| gi 197692221 | 14-3-3 protein beta/alpha                                                                                                                                                                                                             | 0.981 | 0.96  | 1.168 | 5 | 1.036 | 0.115 |
| gi 193506632 | Chain A, Crystal Structure Of Human Phosphoglycerate Kinase Bound To D-Adp                                                                                                                                                            | 1.131 | 0.913 | 1.065 | 5 | 1.036 | 0.112 |
| gi 178663    | medium tumor antigen-associated 61-kD protein                                                                                                                                                                                         | 1.025 | 1.1   | 0.986 | 1 | 1.037 | 0.058 |
| gi 119598291 | pyruvate kinase, muscle, isoform CRA_b                                                                                                                                                                                                | 1.083 | 0.967 | 1.062 | 2 | 1.037 | 0.062 |
| gi 21068652  | apoA-I binding protein                                                                                                                                                                                                                | 0.961 | 1.095 | 1.062 | 2 | 1.039 | 0.070 |
| gi 3318841   | Chain A, Horf6 A Novel Human Peroxidase Enzyme                                                                                                                                                                                        | 0.978 | 1.121 | 1.019 | 5 | 1.039 | 0.074 |
| gi 218511895 | Putative uncharacterized protein FLJ45840                                                                                                                                                                                             |       | 1.187 | 0.893 | 1 | 1.040 | 0.208 |
| gi 1483511   | 3-hydroxyacyl-CoA dehydrogenase                                                                                                                                                                                                       | 1.131 | 1.127 | 0.864 | 2 | 1.041 | 0.153 |
| gi 31543380  | Parkinson disease protein 7                                                                                                                                                                                                           | 0.941 | 1.13  | 1.053 | 5 | 1.041 | 0.095 |
| gi 169216498 | hypothetical LOC389901                                                                                                                                                                                                                | 0.969 | 1.363 | 0.792 | 3 | 1.041 | 0.292 |
| gi 179074    | alternative                                                                                                                                                                                                                           | 1.035 | 1.074 | 1.015 | 4 | 1.041 | 0.030 |
| gi 20664358  | Chain A, Crystal structure of a recombinant glutathione transferase, created by replacing The Last Seven Residues Of Each Subunit Of The Human Class Pi Isoenzyme With The Additional C-Terminal Helix Of Human Class Alpha Isoenzyme | 1.069 | 1.025 | 1.032 | 5 | 1.042 | 0.024 |
| gi 1655596   | ribosomal protein L31                                                                                                                                                                                                                 | 1.078 | 1.037 | 1.012 | 3 | 1.042 | 0.033 |
| gi 183777    | HLA-Bw62 antigen                                                                                                                                                                                                                      | 1.21  | 0.986 | 0.931 | 3 | 1.042 | 0.148 |
| gi 31543397  | phosphoglycerate kinase 2                                                                                                                                                                                                             | 1.131 | 0.945 | 1.052 | 5 | 1.043 | 0.093 |
| gi 194381612 | unnamed protein product                                                                                                                                                                                                               | 0.915 | 1.091 | 1.123 | 5 | 1.043 | 0.112 |
| gi 4503609   | electron-transfer-flavoprotein, beta polypeptide isoform 1                                                                                                                                                                            | 0.898 | 1.184 | 1.049 | 5 | 1.044 | 0.143 |
| gi 16307468  | LRPPRC protein                                                                                                                                                                                                                        |       | 0.855 | 1.233 | 5 | 1.044 | 0.267 |
| gi 4759160   | small nuclear ribonucleoprotein polypeptide D3                                                                                                                                                                                        | 1.032 | 1.144 | 0.962 | 1 | 1.046 | 0.092 |
| gi 2506545   | 78 kDa glucose-regulated protein                                                                                                                                                                                                      | 0.998 | 1.077 | 1.064 | 5 | 1.046 | 0.042 |
| gi 1843434   | KM-102-derived reductase-like factor                                                                                                                                                                                                  | 1.073 | 1.095 | 0.972 | 3 | 1.047 | 0.066 |
| gi 119595229 | nuclear mitotic apparatus protein 1, isoform CRA_c                                                                                                                                                                                    | 1.065 |       | 1.029 | 2 | 1.047 | 0.025 |
| gi 4505763   | phosphoglycerate kinase 1                                                                                                                                                                                                             | 1.131 | 0.945 | 1.065 | 5 | 1.047 | 0.094 |
| gi 5031973   | protein disulfide isomerase-associated 6                                                                                                                                                                                              | 1.075 | 1.061 | 1.007 | 5 | 1.048 | 0.036 |
| gi 3355455   | R33729_1                                                                                                                                                                                                                              | 0.962 | 1.092 | 1.09  | 4 | 1.048 | 0.074 |
| gi 194388374 | unnamed protein product                                                                                                                                                                                                               | 1.012 | 0.993 | 1.141 | 5 | 1.049 | 0.081 |

|              |                                                                                                                                                                                    |       |       |       |   |       |       |
|--------------|------------------------------------------------------------------------------------------------------------------------------------------------------------------------------------|-------|-------|-------|---|-------|-------|
| gi 55958543  | heterogeneous nuclear ribonucleoprotein K                                                                                                                                          | 0.935 | 1.01  | 1.207 | 3 | 1.051 | 0.140 |
| gi 7023366   | unnamed protein product                                                                                                                                                            | 0.863 | 1.414 | 0.876 | 5 | 1.051 | 0.314 |
| gi 24234688  | heat shock 70kDa protein 9 precursor                                                                                                                                               | 0.958 | 1.066 | 1.132 | 5 | 1.052 | 0.088 |
| gi 194382176 | unnamed protein product                                                                                                                                                            | 0.827 | 1.318 | 1.014 | 4 | 1.053 | 0.248 |
| gi 596140    | proteasome subunit LMP7                                                                                                                                                            | 0.994 | 1.067 | 1.098 | 2 | 1.053 | 0.053 |
| gi 159162689 | Chain A, Human Protein Disulfide Isomerase, Nmr, 40 Structures                                                                                                                     | 1.022 | 1.105 | 1.032 | 5 | 1.053 | 0.045 |
| gi 5453559   | ATP synthase, H+ transporting, mitochondrial F0 complex, subunit d isoform a                                                                                                       | 1.037 | 1.008 | 1.115 | 5 | 1.053 | 0.055 |
| gi 4557317   | annexin A11                                                                                                                                                                        | 0.942 | 0.814 | 1.405 | 2 | 1.054 | 0.311 |
| gi 5803023   | lectin, mannose-binding 2 precursor                                                                                                                                                | 1.029 | 1.023 | 1.112 | 3 | 1.055 | 0.050 |
| gi 4506243   | polypyrimidine tract-binding protein 1 isoform a                                                                                                                                   | 0.947 | 0.952 | 1.268 | 5 | 1.056 | 0.184 |
| gi 13129018  | gamma-glutamyl cyclotransferase                                                                                                                                                    | 0.966 | 1.142 | 1.061 | 3 | 1.056 | 0.088 |
| gi 5174539   | cytosolic malate dehydrogenase                                                                                                                                                     | 0.999 | 1.065 | 1.106 | 5 | 1.057 | 0.054 |
| gi 558596    | prolyl oligopeptidase                                                                                                                                                              | 1.099 | 1.164 | 0.907 | 2 | 1.057 | 0.134 |
| gi 119599627 | hCG1646871                                                                                                                                                                         | 1.037 | 1.142 | 0.992 | 5 | 1.057 | 0.077 |
| gi 5262681   | hypothetical protein                                                                                                                                                               | 1.03  | 1.048 | 1.093 | 2 | 1.057 | 0.032 |
| gi 62898171  | L-plastin variant                                                                                                                                                                  | 1.013 | 1.092 | 1.067 | 3 | 1.057 | 0.040 |
| gi 183351    | glycogen phosphorylase type IV                                                                                                                                                     | 1.068 | 1.056 | 1.048 | 3 | 1.057 | 0.010 |
| gi 3153908   | liver glycogen phosphorylase                                                                                                                                                       | 1.068 | 1.056 | 1.048 | 3 | 1.057 | 0.010 |
| gi 704416    | elongation factor Tu                                                                                                                                                               | 1.149 | 1.043 | 0.98  | 5 | 1.057 | 0.085 |
| gi 28178825  | isocitrate dehydrogenase 1 (NADP+), soluble                                                                                                                                        | 1.076 | 1.141 | 0.956 | 5 | 1.058 | 0.094 |
| gi 36146     | ribosomal protein S12                                                                                                                                                              | 1.216 | 1.037 | 0.922 | 5 | 1.058 | 0.148 |
| gi 13477319  | RPL14 protein                                                                                                                                                                      |       | 1.068 | 1.049 | 3 | 1.059 | 0.013 |
| gi 8394076   | proteasome (prosome, macropain) subunit, alpha type 6                                                                                                                              | 1.17  | 0.983 | 1.027 | 5 | 1.060 | 0.098 |
| gi 3327110   | KIAA0648 protein                                                                                                                                                                   | 1.036 | 1.1   | 1.045 | 1 | 1.060 | 0.035 |
| gi 165761145 | Chain A, Structure Of A104t Dj-1                                                                                                                                                   | 1.086 |       | 1.035 | 3 | 1.061 | 0.036 |
| gi 5803013   | endoplasmic reticulum protein 29 isoform 1 precursor                                                                                                                               | 0.937 | 1.068 | 1.179 | 5 | 1.061 | 0.121 |
| gi 1924954   | galectin                                                                                                                                                                           | 1.03  |       | 1.093 | 1 | 1.062 | 0.045 |
| gi 1065111   | Chain A, High Resolution Solution Nmr Structure Of Mixed Disulfide Intermediate Between Mutant Human Thioredoxin And A 13 Residue Peptide Comprising Its Target Site In Human Nfkb | 1.144 | 1.203 | 0.838 | 2 | 1.062 | 0.196 |
| gi 4235275   | talin                                                                                                                                                                              | 1.231 | 0.983 | 0.971 | 5 | 1.062 | 0.147 |
| gi 169213873 | Glucose phosphate isomerase                                                                                                                                                        | 1.087 | 1.025 | 1.075 | 2 | 1.062 | 0.033 |
| gi 189238    | neuroleukin                                                                                                                                                                        | 0.942 | 1.008 | 1.239 | 2 | 1.063 | 0.156 |
| gi 306875    | C protein                                                                                                                                                                          | 0.967 |       | 1.159 | 2 | 1.063 | 0.136 |
| gi 169208088 | glyceraldehyde-3-phosphate dehydrogenase-like 6                                                                                                                                    | 1.117 | 1.042 | 1.03  | 3 | 1.063 | 0.047 |
| gi 1552242   | hRif beta subunit (p102 protein)                                                                                                                                                   | 0.996 | 0.931 | 1.264 | 5 | 1.064 | 0.177 |
| gi 2815604   | Opa-interacting protein OIP2                                                                                                                                                       | 1.293 | 0.796 | 1.104 | 1 | 1.064 | 0.251 |
| gi 133254    | Heterogeneous nuclear ribonucleoprotein A1                                                                                                                                         | 1.024 | 0.962 | 1.208 | 5 | 1.065 | 0.128 |
| gi 2624694   | Chain A, Human Mitochondrial Single-Stranded Dna Binding Protein                                                                                                                   | 1.052 | 1.212 | 0.931 | 2 | 1.065 | 0.141 |
| gi 306891    | 90kDa heat shock protein                                                                                                                                                           | 1.048 | 0.993 | 1.155 | 2 | 1.065 | 0.082 |
| gi 31291     | unnamed protein product                                                                                                                                                            | 1.005 | 1.098 | 1.099 | 2 | 1.067 | 0.054 |
| gi 5729953   | nuclear distribution gene C homolog                                                                                                                                                | 1.056 | 1.036 | 1.11  | 1 | 1.067 | 0.038 |

|              |                                                                                                                           |       |       |       |   |       |       |
|--------------|---------------------------------------------------------------------------------------------------------------------------|-------|-------|-------|---|-------|-------|
| gi 61104919  | heat shock protein 90Bf                                                                                                   | 1.091 | 0.989 | 1.123 | 5 | 1.068 | 0.070 |
| gi 56204418  | heat shock protein 90kDa alpha (cytosolic), class B member 1                                                              | 1.091 | 0.989 | 1.123 | 5 | 1.068 | 0.070 |
| gi 847724    | methylthioadenosine phosphorylase                                                                                         | 1.213 | 0.811 | 1.179 | 3 | 1.068 | 0.223 |
| gi 6841176   | HSPC263                                                                                                                   | 1.094 | 1.017 | 1.094 | 3 | 1.068 | 0.044 |
| gi 4503097   | casein kinase 2, alpha prime polypeptide                                                                                  | 1.144 | 1.055 | 1.007 | 2 | 1.069 | 0.070 |
| gi 1401034   | hyaluronan synthase                                                                                                       | 0.97  | 1.156 | 1.083 | 3 | 1.070 | 0.094 |
| gi 194389892 | unnamed protein product                                                                                                   | 1.093 | 1.03  | 1.087 | 3 | 1.070 | 0.035 |
| gi 31615966  | Chain A, Crystal Structure Of Familial Als Mutant S134n Of Human Cu, Zn Superoxide Dismutase (Cuznsod) To 1.3a Resolution | 1.023 | 1.164 | 1.024 | 2 | 1.070 | 0.081 |
| gi 7706495   | DnaJ (Hsp40) homolog, subfamily B, member 11 precursor                                                                    | 0.901 | 1.109 | 1.203 | 2 | 1.071 | 0.155 |
| gi 169160753 | mCG50656                                                                                                                  | 1.093 | 1.043 | 1.078 | 4 | 1.071 | 0.026 |
| gi 2098347   | Chain A, Physiological Dimer Hpp Precursor                                                                                | 1.095 |       | 1.05  | 1 | 1.073 | 0.032 |
| gi 88953571  | protein expressed in prostate, ovary, testis, and placenta 2 isoform 2                                                    | 1.299 | 1.009 | 0.91  | 5 | 1.073 | 0.202 |
| gi 4501885   | beta actin                                                                                                                | 0.986 | 1.004 | 1.23  | 5 | 1.073 | 0.136 |
| gi 4218034   | GTP-binding regulatory protein Gi alpha-2 chain                                                                           | 0.992 | 1.096 | 1.134 | 5 | 1.074 | 0.074 |
| gi 219478    | apurinic/apyrimidinic endonuclease                                                                                        | 0.789 | 1.184 | 1.253 | 2 | 1.075 | 0.250 |
| gi 6518533   | adenylate kinase 3 alpha                                                                                                  | 1.204 | 0.926 | 1.096 | 1 | 1.075 | 0.140 |
| gi 4758304   | protein disulfide isomerase-associated 4                                                                                  | 0.97  | 1.028 | 1.231 | 3 | 1.076 | 0.137 |
| gi 54304028  | glyceraldehyde-3-phosphate dehydrogenase                                                                                  | 1.084 | 1.077 | 1.068 | 2 | 1.076 | 0.008 |
| gi 2282013   | GAPDH-2 like                                                                                                              | 1.095 | 1.072 | 1.065 | 2 | 1.077 | 0.016 |
| gi 194388808 | unnamed protein product                                                                                                   | 1.095 | 1.072 | 1.065 | 5 | 1.077 | 0.016 |
| gi 15082234  | lactate dehydrogenase A-like 6B                                                                                           | 1.01  | 1.137 | 1.087 | 1 | 1.078 | 0.064 |
| gi 5031857   | L-lactate dehydrogenase A isoform 1                                                                                       | 1.01  | 1.137 | 1.087 | 5 | 1.078 | 0.064 |
| gi 13431875  | Putative S100 calcium-binding protein H_NH0456N16.1                                                                       | 1.12  | 1.203 | 0.912 | 5 | 1.078 | 0.150 |
| gi 33286420  | pyruvate kinase, muscle isoform M1                                                                                        | 1.083 | 1.091 | 1.062 | 3 | 1.079 | 0.015 |
| gi 7634779   | HDCMA39P                                                                                                                  | 0.896 | 1.118 | 1.223 | 1 | 1.079 | 0.167 |
| gi 23308751  | 3-hydroxyisobutyrate dehydrogenase                                                                                        | 1.045 | 0.857 | 1.335 | 1 | 1.079 | 0.241 |
| gi 56676393  | Rho GDP dissociation inhibitor (GDI) beta                                                                                 | 1.048 | 1.384 | 0.807 | 5 | 1.080 | 0.290 |
| gi 28336     | mutant beta-actin (beta'-actin)                                                                                           | 1.299 | 1.009 | 0.931 | 5 | 1.080 | 0.194 |
| gi 134133226 | protein expressed in prostate, ovary, testis, and placenta 2                                                              | 1.299 | 1.009 | 0.931 | 5 | 1.080 | 0.194 |
| gi 221043300 | unnamed protein product                                                                                                   | 1.299 | 1.009 | 0.931 | 5 | 1.080 | 0.194 |
| gi 16877746  | Similar to mannose-6-phosphate receptor (cation dependent)                                                                |       | 1.257 | 0.903 | 1 | 1.080 | 0.250 |
| gi 189545    | plasminogen activator inhibitor                                                                                           | 1.237 | 1.015 | 0.99  | 2 | 1.081 | 0.136 |
| gi 5031571   | actin-related protein 2 isoform b                                                                                         | 1.103 | 1.075 | 1.066 | 3 | 1.081 | 0.019 |
| gi 435756    | lysosomal membrane glycoprotein lamp-2 homolog                                                                            | 1.202 |       | 0.961 | 1 | 1.082 | 0.170 |
| gi 34719     | unnamed protein product                                                                                                   | 1.067 | 1.049 | 1.129 | 5 | 1.082 | 0.042 |
| gi 31417921  | TKT protein                                                                                                               | 1.062 | 1.175 | 1.008 | 3 | 1.082 | 0.085 |
| gi 38013966  | TKT protein                                                                                                               | 1.12  | 1.059 | 1.066 | 5 | 1.082 | 0.033 |
| gi 2689608   | UEV1Bs                                                                                                                    | 0.995 | 1.066 | 1.187 | 3 | 1.083 | 0.097 |
| gi 4503729   | FK506 binding protein 52                                                                                                  | 1.024 | 1.383 | 0.841 | 1 | 1.083 | 0.276 |
| gi 32488     | unnamed protein product                                                                                                   | 1.146 | 1.051 | 1.052 | 4 | 1.083 | 0.055 |
| gi 414587    | ribosomal protein L10                                                                                                     | 1.008 | 1.062 | 1.179 | 5 | 1.083 | 0.087 |

|              |                                                                                                                        |       |       |       |   |       |       |
|--------------|------------------------------------------------------------------------------------------------------------------------|-------|-------|-------|---|-------|-------|
| gi 134105063 | Chain B, Crystal Structure And Solution Nmr Studies Of Lys48-Linked Tetraubiquitin At Neutral Ph                       | 1.093 | 1.086 | 1.071 | 5 | 1.083 | 0.011 |
| gi 117167827 | ACTB protein                                                                                                           | 1.299 | 1.009 | 0.943 | 3 | 1.084 | 0.189 |
| gi 22538467  | proteasome beta 4 subunit                                                                                              | 1.084 | 1.232 | 0.936 | 4 | 1.084 | 0.148 |
| gi 5902102   | small nuclear ribonucleoprotein D1 polypeptide 16kDa                                                                   | 0.895 | 1.212 | 1.145 | 2 | 1.084 | 0.167 |
| gi 54696200  | RAP1A, member of RAS oncogene family                                                                                   | 0.993 | 1.193 | 1.067 | 3 | 1.084 | 0.101 |
| gi 179832    | calnexin                                                                                                               | 0.993 | 1.238 | 1.022 | 5 | 1.084 | 0.134 |
| gi 71042476  | Chain A, Crystal Structure Of Human Potassium Channel Kv Beta-Subunit (Kcnab2)                                         | 1.04  | 1.166 | 1.048 | 3 | 1.085 | 0.071 |
| gi 48145549  | PGK1                                                                                                                   | 1.108 | 1.078 | 1.071 | 5 | 1.086 | 0.020 |
| gi 2780871   | Chain B, Proteasome Activator Reg(Alpha)                                                                               | 1.112 | 1.24  | 0.905 | 4 | 1.086 | 0.169 |
| gi 197724894 | Chain A, Crystal Structure Of E60q Mutant Of Fkbp12                                                                    | 1.116 |       | 1.056 | 2 | 1.086 | 0.042 |
| gi 4503423   | deoxyuridine triphosphatase isoform 2                                                                                  | 1.216 | 1.12  | 0.923 | 5 | 1.086 | 0.149 |
| gi 8671754   | DAZ associated protein 1                                                                                               | 0.983 | 1.068 | 1.21  | 2 | 1.087 | 0.115 |
| gi 339647    | thyroid hormone binding protein precursor                                                                              | 1.084 | 1.15  | 1.027 | 2 | 1.087 | 0.062 |
| gi 18375501  | APEX nuclease 1                                                                                                        | 1.116 |       | 1.058 | 5 | 1.087 | 0.041 |
| gi 16579885  | ribosomal protein L4                                                                                                   | 1.219 |       | 0.957 | 3 | 1.088 | 0.185 |
| gi 23510338  | ubiquitin-activating enzyme E1                                                                                         | 1.09  | 1.021 | 1.154 | 5 | 1.088 | 0.067 |
| gi 3170190   | antigen NY-CO-25                                                                                                       | 1.109 | 1.097 | 1.061 | 1 | 1.089 | 0.025 |
| gi 940536    | P1 Cdc21 protein                                                                                                       | 1.121 | 1.056 | 1.091 | 2 | 1.089 | 0.033 |
| gi 28940     | unnamed protein product                                                                                                | 1.184 | 1.069 | 1.015 | 5 | 1.089 | 0.086 |
| gi 189306    | nucleolin                                                                                                              | 1.08  | 1.088 | 1.101 | 2 | 1.090 | 0.011 |
| gi 38197252  | MCM2 protein                                                                                                           | 1.104 | 1.118 | 1.048 | 2 | 1.090 | 0.037 |
| gi 13676857  | heat shock 70kDa protein 2                                                                                             | 1.118 | 1.045 | 1.108 | 5 | 1.090 | 0.040 |
| gi 13775198  | SH3 domain binding glutamic acid-rich protein like 3                                                                   | 1.188 | 1.162 | 0.922 | 5 | 1.091 | 0.147 |
| gi 10716563  | calnexin precursor                                                                                                     | 0.995 | 1.062 | 1.216 | 5 | 1.091 | 0.113 |
| gi 17391477  | Annexin A5                                                                                                             | 1.061 | 1.138 | 1.078 | 3 | 1.092 | 0.040 |
| gi 221041984 | unnamed protein product                                                                                                | 0.982 | 1.004 | 1.292 | 5 | 1.093 | 0.173 |
| gi 457436    | basic transcription factor 3a                                                                                          | 1.088 | 1.128 | 1.062 | 2 | 1.093 | 0.033 |
| gi 7669492   | glyceraldehyde-3-phosphate dehydrogenase                                                                               | 1.1   | 1.079 | 1.099 | 2 | 1.093 | 0.012 |
| gi 157833780 | Chain A, Human Annexin V With Proline Substitution By Thioproline                                                      | 1.025 | 1.233 | 1.022 | 5 | 1.093 | 0.121 |
| gi 509291    | H+-ATP synthase subunit b                                                                                              | 1.131 | 1.21  | 0.946 | 2 | 1.096 | 0.136 |
| gi 21758578  | unnamed protein product                                                                                                | 0.866 | 1.011 | 1.411 | 5 | 1.096 | 0.282 |
| gi 7023323   | unnamed protein product                                                                                                | 1.015 | 1.234 | 1.039 | 2 | 1.096 | 0.120 |
| gi 188492    | heat shock-induced protein                                                                                             | 1.059 | 1.07  | 1.16  | 3 | 1.096 | 0.055 |
| gi 36059     | RING12                                                                                                                 | 1.14  | 1.099 | 1.051 | 2 | 1.097 | 0.045 |
| gi 4759112   | solute carrier family 16, member 3                                                                                     | 1.172 | 1.158 | 0.962 | 3 | 1.097 | 0.117 |
| gi 55669744  | Chain A, Nmr Structure Of Rrm2 From Human Polypyrimidine Tract Binding Protein Isoform 1 (Ptb1)                        | 1.237 | 0.972 | 1.083 | 3 | 1.097 | 0.133 |
| gi 5174741   | ubiquitin carboxyl-terminal esterase L3                                                                                | 0.899 | 1.067 | 1.328 | 5 | 1.098 | 0.216 |
| gi 21730367  | Chain A, Ca2+-Binding Mimicry In The Crystal Structure Of The Eu3+-Bound Mutant Human Macrophage Capping Protein Cap G | 1.036 | 1.117 | 1.142 | 2 | 1.098 | 0.055 |
| gi 194373703 | unnamed protein product                                                                                                | 0.978 | 0.996 | 1.324 | 5 | 1.099 | 0.195 |



|              |                                                                                                                                                                             |       |       |       |   |       |       |
|--------------|-----------------------------------------------------------------------------------------------------------------------------------------------------------------------------|-------|-------|-------|---|-------|-------|
| gi 33987931  | HSP90AB1 protein                                                                                                                                                            | 1.049 | 1.105 | 1.144 | 2 | 1.099 | 0.048 |
| gi 4502111   | annexin VII isoform 1                                                                                                                                                       | 1.036 | 1.155 | 1.11  | 1 | 1.100 | 0.060 |
| gi 21752646  | unnamed protein product                                                                                                                                                     | 0.88  | 1.011 | 1.411 | 5 | 1.101 | 0.277 |
| gi 1942609   | Chain A, Human Rap1a, Residues 1-167, Double Mutant (E30d,K31e) Complexed With Gppnhp And The Ras-Binding-Domain Of Human C-Raf1, Residues 51-131                           | 0.993 | 1.193 | 1.118 | 3 | 1.101 | 0.101 |
| gi 194381006 | unnamed protein product                                                                                                                                                     |       | 1.107 | 1.098 | 2 | 1.103 | 0.006 |
| gi 62898285  | heat shock 70kDa protein 6 (HSP70B') variant                                                                                                                                | 1.022 | 1.127 | 1.159 | 4 | 1.103 | 0.072 |
| gi 5729877   | heat shock 70kDa protein 8 isoform 1                                                                                                                                        | 1.022 | 1.127 | 1.159 | 5 | 1.103 | 0.072 |
| gi 23271312  | HSPA2 protein                                                                                                                                                               | 1.022 | 1.127 | 1.16  | 5 | 1.103 | 0.072 |
| gi 49168580  | MDH2                                                                                                                                                                        | 1.114 | 1.086 | 1.11  | 4 | 1.103 | 0.015 |
| gi 8922601   | ADP-ribosylation factor-like 10C                                                                                                                                            | 1.051 | 0.926 | 1.335 | 5 | 1.104 | 0.210 |
| gi 20270343  | ADP-ribosylation factor-like 8A                                                                                                                                             | 1.051 | 0.926 | 1.335 | 5 | 1.104 | 0.210 |
| gi 1314308   | nucleophosmin-retinoic acid receptor alpha fusion protein NPM-RAR long form                                                                                                 | 0.995 | 1.06  | 1.263 | 5 | 1.106 | 0.140 |
| gi 7705696   | endoplasmic reticulum thioredoxin superfamily member, 18 kDa                                                                                                                | 1.119 | 1.099 | 1.1   | 2 | 1.106 | 0.011 |
| gi 1710248   | protein disulfide isomerase-related protein 5                                                                                                                               | 1.075 | 1.061 | 1.186 | 5 | 1.107 | 0.068 |
| gi 181184    | stomatin peptide                                                                                                                                                            | 1.141 | 1.298 | 0.883 | 2 | 1.107 | 0.210 |
| gi 24234686  | heat shock 70kDa protein 8 isoform 2                                                                                                                                        | 1.095 | 1.048 | 1.18  | 5 | 1.108 | 0.067 |
| gi 438639    | lamin B receptor                                                                                                                                                            | 1.269 | 1.054 | 1     | 1 | 1.108 | 0.142 |
| gi 62089422  | membrane alanine aminopeptidase precursor variant                                                                                                                           | 1.12  |       | 1.096 | 5 | 1.108 | 0.017 |
| gi 205277465 | transketolase isoform 2                                                                                                                                                     | 1.055 | 1.062 | 1.208 | 5 | 1.108 | 0.086 |
| gi 13569956  | actin related protein 2/3 complex, subunit 5-like                                                                                                                           | 0.898 |       | 1.32  | 1 | 1.109 | 0.298 |
| gi 88992455  | hypothetical protein isoform 1                                                                                                                                              | 1.095 | 1.054 | 1.179 | 5 | 1.109 | 0.064 |
| gi 189067253 | unnamed protein product                                                                                                                                                     | 1.296 | 0.942 | 1.09  | 5 | 1.109 | 0.178 |
| gi 42734438  | hypothetical protein LOC51571                                                                                                                                               | 1.211 | 1.054 | 1.066 | 5 | 1.110 | 0.087 |
| gi 1545813   | KNP-Ia                                                                                                                                                                      | 1.224 | 1.03  | 1.078 | 1 | 1.111 | 0.101 |
| gi 181914    | DNA-binding protein                                                                                                                                                         | 1.294 | 1.077 | 0.962 | 2 | 1.111 | 0.169 |
| gi 109157100 | Chain A, Structure Of Human Purine Nucleoside Phosphorylase H257g Mutant                                                                                                    | 0.915 | 1.011 | 1.411 | 5 | 1.112 | 0.263 |
| gi 387033    | purine nucleoside phosphorylase                                                                                                                                             | 0.915 | 1.011 | 1.411 | 5 | 1.112 | 0.263 |
| gi 20070125  | prolyl 4-hydroxylase, beta subunit precursor                                                                                                                                | 1.157 | 1.124 | 1.056 | 5 | 1.112 | 0.052 |
| gi 145309046 | POTE-2 alpha-actin                                                                                                                                                          | 1.131 | 0.943 | 1.264 | 5 | 1.113 | 0.161 |
| gi 4557395   | carbonic anhydrase II                                                                                                                                                       | 1.13  | 1.369 | 0.842 | 2 | 1.114 | 0.264 |
| gi 145579602 | Chain A, Crystallographic And Kinetic Studies Of Human Mitochondrial Acetoacetyl-Coa Thiolase (T2): The Importance Of Potassium And Chloride For Its Structure And Function | 1.042 | 1.128 | 1.178 | 5 | 1.116 | 0.069 |
| gi 4757810   | ATP synthase, H+ transporting, mitochondrial F1 complex, alpha subunit precursor                                                                                            | 1.188 | 1.335 | 0.826 | 5 | 1.116 | 0.262 |
| gi 3860002   | unknown                                                                                                                                                                     | 0.989 | 1.35  | 1.01  | 1 | 1.116 | 0.203 |
| gi 1575607   | FUSE binding protein 2                                                                                                                                                      | 1.104 | 1.183 | 1.066 | 4 | 1.118 | 0.060 |
| gi 194386896 | unnamed protein product                                                                                                                                                     | 1.175 | 0.89  | 1.289 | 5 | 1.118 | 0.206 |
| gi 33337556  | citrate synthase                                                                                                                                                            | 0.896 | 1.163 | 1.298 | 3 | 1.119 | 0.205 |

|              |                                                                                  |       |       |       |   |       |       |
|--------------|----------------------------------------------------------------------------------|-------|-------|-------|---|-------|-------|
| gi 433938    | ERGIC53                                                                          | 1.067 | 1.203 | 1.087 | 2 | 1.119 | 0.073 |
| gi 194379304 | unnamed protein product                                                          | 1.132 | 1.107 | 1.119 | 5 | 1.119 | 0.013 |
| gi 25453472  | eukaryotic translation elongation factor 1 delta isoform 2                       | 1.105 | 1.243 | 1.013 | 5 | 1.120 | 0.116 |
| gi 35222     | unnamed protein product                                                          | 1.045 | 1.078 | 1.239 | 5 | 1.121 | 0.104 |
| gi 55670364  | Chain A, Human Peroxiredoxin 5, C47s Mutant                                      | 1.16  | 1.176 | 1.026 | 5 | 1.121 | 0.082 |
| gi 4502297   | ATP synthase, H+ transporting, mitochondrial F1 complex, delta subunit precursor | 1.084 | 1.126 | 1.155 | 2 | 1.122 | 0.036 |
| gi 14016     | cytochrome C oxidase II subunit                                                  | 1.069 | 1.119 | 1.18  | 3 | 1.123 | 0.056 |
| gi 7243107   | KIAA1363 protein                                                                 | 1.09  | 1.231 | 1.053 | 2 | 1.125 | 0.094 |
| gi 187399    | myeloblastin                                                                     | 0.956 | 1.047 | 1.375 | 1 | 1.126 | 0.220 |
| gi 35193     | unnamed protein product                                                          | 0.956 | 1.047 | 1.375 | 5 | 1.126 | 0.220 |
| gi 21759781  | Heat shock 70kDa protein 1-like                                                  | 1.088 | 1.045 | 1.246 | 4 | 1.126 | 0.106 |
| gi 119587946 | heat shock 70kDa protein 8, isoform CRA_c                                        | 1.088 | 1.045 | 1.246 | 3 | 1.126 | 0.106 |
| gi 194389734 | unnamed protein product                                                          | 1.088 | 1.045 | 1.246 | 3 | 1.126 | 0.106 |
| gi 4502673   | CD47 antigen isoform 1 precursor                                                 | 1.204 | 1.177 | 1     | 2 | 1.127 | 0.111 |
| gi 20149675  | EF-hand domain family, member D2                                                 |       | 0.993 | 1.264 | 2 | 1.129 | 0.192 |
| gi 12653415  | Heat shock 70kDa protein 9 (mortalin)                                            | 1.089 | 1.052 | 1.248 | 5 | 1.130 | 0.104 |
| gi 34419635  | heat shock 70kDa protein 6 (HSP70B')                                             | 1.022 | 1.127 | 1.243 | 2 | 1.131 | 0.111 |
| gi 21361181  | Na+/K+ -ATPase alpha 1 subunit isoform a proprotein                              | 0.966 | 1.214 | 1.213 | 5 | 1.131 | 0.143 |
| gi 123079    | Beta-hexosaminidase subunit alpha                                                | 1.205 | 1.113 | 1.078 | 1 | 1.132 | 0.066 |
| gi 5031573   | ARP3 actin-related protein 3 homolog                                             | 0.91  | 1.074 | 1.418 | 3 | 1.134 | 0.259 |
| gi 4503037   | cellular repressor of E1A-stimulated genes                                       | 1.115 | 1.234 | 1.053 | 1 | 1.134 | 0.092 |
| gi 10439505  | unnamed protein product                                                          | 1.128 |       | 1.142 | 1 | 1.135 | 0.010 |
| gi 119577375 | biliverdin reductase B (flavin reductase (NADPH)), isoform CRA_c                 | 1.096 | 1.273 | 1.037 | 2 | 1.135 | 0.123 |
| gi 6755448   | SEC22 vesicle trafficking protein-like 1                                         | 1.118 |       | 1.153 | 1 | 1.136 | 0.025 |
| gi 5174731   | translin-associated factor X                                                     | 0.887 | 1.071 | 1.449 | 2 | 1.136 | 0.287 |
| gi 7448823   | adenosine kinase                                                                 | 0.861 | 1.142 | 1.406 | 2 | 1.136 | 0.273 |
| gi 5453990   | proteasome activator subunit 1 isoform 1                                         | 1.141 | 1.24  | 1.033 | 5 | 1.138 | 0.104 |
| gi 57162629  | vinculin                                                                         | 1.011 | 1.14  | 1.272 | 3 | 1.141 | 0.131 |
| gi 4506609   | ribosomal protein L19                                                            | 1.058 | 1.063 | 1.306 | 5 | 1.142 | 0.142 |
| gi 194374345 | unnamed protein product                                                          | 1.19  | 1.103 | 1.142 | 3 | 1.145 | 0.044 |
| gi 192228    | 7 enoyl-CoA hydratase                                                            | 1.095 |       | 1.198 | 1 | 1.147 | 0.073 |
| gi 28614     | aldolase A                                                                       | 1.073 | 1.293 | 1.074 | 5 | 1.147 | 0.127 |
| gi 194378468 | unnamed protein product                                                          | 1.073 | 1.293 | 1.074 | 5 | 1.147 | 0.127 |
| gi 21624607  | coactosin-like 1                                                                 | 1.069 | 1.173 | 1.199 | 2 | 1.147 | 0.069 |
| gi 62088804  | minichromosome maintenance deficient protein 5 variant                           | 1.03  | 1.145 | 1.268 | 2 | 1.148 | 0.119 |
| gi 119617399 | serine hydroxymethyltransferase 2 (mitochondrial), isoform CRA_a                 | 1.199 | 1.056 | 1.192 | 5 | 1.149 | 0.081 |
| gi 5453980   | DnaJ (Hsp40) homolog, subfamily C, member 3                                      | 1.244 |       | 1.054 | 1 | 1.149 | 0.134 |
| gi 62897129  | heat shock 70kDa protein 8 isoform 1 variant                                     | 1.119 | 1.133 | 1.197 | 5 | 1.150 | 0.042 |
| gi 31545     | valyl-tRNA synthetase                                                            | 1.13  | 1.178 | 1.142 | 5 | 1.150 | 0.025 |
| gi 12667788  | myosin, heavy polypeptide 9, non-muscle                                          | 0.979 | 0.975 | 1.496 | 5 | 1.150 | 0.300 |
| gi 62088286  | ARP3 actin-related protein 3 homolog variant                                     | 1.159 | 1.177 | 1.115 | 3 | 1.150 | 0.032 |
| gi 62898960  | transketolase variant                                                            | 1.106 | 1.189 | 1.157 | 5 | 1.151 | 0.042 |

|              |                                                                                                          |       |       |       |   |       |       |
|--------------|----------------------------------------------------------------------------------------------------------|-------|-------|-------|---|-------|-------|
| gi 6465985   | quiescent cell proline dipeptidase                                                                       | 1.046 | 1.137 | 1.271 | 2 | 1.151 | 0.113 |
| gi 729433    | Protein disulfide-isomerase A3                                                                           | 1.114 | 1.091 | 1.249 | 5 | 1.151 | 0.085 |
| gi 2906146   | malate dehydrogenase precursor                                                                           | 1.121 | 1.176 | 1.157 | 5 | 1.151 | 0.028 |
| gi 42794622  | zinc finger protein 784                                                                                  |       | 1.182 | 1.121 | 1 | 1.152 | 0.043 |
| gi 119614877 | myeloperoxidase, isoform CRA_b                                                                           | 1.194 | 1.161 | 1.109 | 5 | 1.155 | 0.043 |
| gi 36102     | unnamed protein product                                                                                  | 1.363 | 0.885 | 1.221 | 5 | 1.156 | 0.245 |
| gi 62898103  | aspartate aminotransferase 2 precursor variant                                                           | 1.105 | 1.169 | 1.203 | 5 | 1.159 | 0.050 |
| gi 189617    | protein PP4-X                                                                                            | 1.126 | 1.247 | 1.112 | 5 | 1.162 | 0.074 |
| gi 307141    | lysozyme precursor (EC 3.2.1.17)                                                                         | 1.459 | 0.884 | 1.145 | 5 | 1.163 | 0.288 |
| gi 71042395  | Chain A, Crystal Structure Of Human Dihydrolipoamide Dehydrogenase Complexed To Nad+                     | 1.073 | 1.257 | 1.161 | 5 | 1.164 | 0.092 |
| gi 118674    | Dihydrolipoyl dehydrogenase, mitochondrial                                                               | 1.073 | 1.257 | 1.161 | 5 | 1.164 | 0.092 |
| gi 37267     | transketolase                                                                                            | 1.017 | 1.175 | 1.303 | 5 | 1.165 | 0.143 |
| gi 238427    | Porin 31HM                                                                                               | 1.365 | 1.051 | 1.083 | 2 | 1.166 | 0.173 |
| gi 5032027   | retinoblastoma binding protein 4 isoform a                                                               | 1.404 | 0.961 | 1.134 | 3 | 1.166 | 0.223 |
| gi 10436946  | unnamed protein product                                                                                  | 1.098 | 1.004 | 1.401 | 1 | 1.168 | 0.207 |
| gi 1478503   | SCG10                                                                                                    | 1.424 | 1.042 | 1.039 | 3 | 1.168 | 0.221 |
| gi 5031851   | stathmin 1                                                                                               | 1.424 | 1.042 | 1.039 | 5 | 1.168 | 0.221 |
| gi 6653226   | sperm antigen-36                                                                                         | 1.084 | 1.15  | 1.272 | 3 | 1.169 | 0.095 |
| gi 193506758 | Chain A, Crystal Structure Of E18q Dj-1                                                                  | 0.941 | 1.13  | 1.442 | 2 | 1.171 | 0.253 |
| gi 133854601 | cytochrome c oxidase subunit II                                                                          | 1.06  | 1.318 | 1.14  | 3 | 1.173 | 0.132 |
| gi 30451     | cytochrome P450 db1                                                                                      | 1.169 | 1.169 | 1.181 | 3 | 1.173 | 0.007 |
| gi 7656991   | coronin, actin binding protein, 1C isoform 1                                                             | 1.13  | 1.258 | 1.134 | 1 | 1.174 | 0.073 |
| gi 5771523   | 3-phosphoglycerate dehydrogenase                                                                         | 1.016 | 1.287 | 1.221 | 3 | 1.175 | 0.141 |
| gi 34709     | manganese superoxide dismutase (MnSOD)                                                                   | 1.301 | 1.43  | 0.799 | 2 | 1.177 | 0.333 |
| gi 5802974   | peroxiredoxin 3 isoform a precursor                                                                      | 1.231 | 1.194 | 1.114 | 5 | 1.180 | 0.060 |
| gi 14327942  | HSP90B1 protein                                                                                          | 1.386 | 1.228 | 0.925 | 2 | 1.180 | 0.234 |
| gi 40068518  | phosphogluconate dehydrogenase                                                                           | 1.21  | 1.202 | 1.131 | 5 | 1.181 | 0.043 |
| gi 809185    | Chain A, The Effect Of Metal Binding On The Structure Of Annexin V And Implications For Membrane Binding | 1.124 | 1.252 | 1.168 | 5 | 1.181 | 0.065 |
| gi 4503841   | ATP-dependent DNA helicase II, 70 kDa subunit                                                            | 1.154 | 1.167 | 1.228 | 3 | 1.183 | 0.040 |
| gi 31746     | glutathione-insulin transhydrogenase (216 AA)                                                            | 1.146 | 1.327 | 1.076 | 2 | 1.183 | 0.130 |
| gi 4759140   | sodium/hydrogen exchanger regulatory factor 1                                                            | 1.016 | 1.449 | 1.09  | 1 | 1.185 | 0.232 |
| gi 1419374   | alpha-mannosidase                                                                                        | 1.253 | 1.174 | 1.133 | 5 | 1.187 | 0.061 |
| gi 178045    | gamma-actin                                                                                              | 1.215 | 1.173 | 1.179 | 5 | 1.189 | 0.023 |
| gi 4504061   | glucosamine (N-acetyl)-6-sulfatase precursor                                                             | 1.263 | 1.252 | 1.054 | 2 | 1.190 | 0.118 |
| gi 6912586   | 6-phosphogluconolactonase                                                                                | 0.843 | 1.326 | 1.404 | 1 | 1.191 | 0.304 |
| gi 7669550   | vinculin isoform meta-VCL                                                                                | 0.946 | 1.14  | 1.497 | 5 | 1.194 | 0.279 |
| gi 4507877   | vinculin isoform VCL                                                                                     | 0.946 | 1.14  | 1.497 | 5 | 1.194 | 0.279 |
| gi 2065179   | unnamed protein product                                                                                  | 1.109 | 1.017 | 1.457 | 3 | 1.194 | 0.232 |
| gi 73983054  | Cofilin-1 isoform 2                                                                                      | 1.132 | 1.538 | 0.915 | 3 | 1.195 | 0.316 |
| gi 20520997  | KIAA0320                                                                                                 | 1.219 | 1.216 | 1.163 | 5 | 1.199 | 0.032 |
| gi 4505773   | prohibitin                                                                                               | 1.42  | 1.184 | 1.001 | 4 | 1.202 | 0.210 |

|              |                                                                                                    |       |       |       |   |       |       |
|--------------|----------------------------------------------------------------------------------------------------|-------|-------|-------|---|-------|-------|
| gi 31543     | unnamed protein product                                                                            | 1.38  | 1.356 | 0.876 | 4 | 1.204 | 0.284 |
| gi 4503513   | eukaryotic translation initiation factor 3, subunit 2 beta, 36kDa                                  | 1.021 |       | 1.389 | 2 | 1.205 | 0.260 |
| gi 28678     | unnamed protein product                                                                            | 1.084 | 1.261 | 1.271 | 5 | 1.205 | 0.105 |
| gi 4503987   | gamma-glutamyl hydrolase precursor                                                                 | 1.191 | 1.461 | 0.966 | 1 | 1.206 | 0.248 |
| gi 1197636   | p105MCM                                                                                            | 1.035 | 1.069 | 1.518 | 2 | 1.207 | 0.270 |
| gi 307109    | lysosomal membrane glycoprotein-1                                                                  | 1.21  | 1.248 | 1.173 | 5 | 1.210 | 0.038 |
| gi 4008131   | chaperonin 10                                                                                      | 1.216 | 1.193 | 1.224 | 2 | 1.211 | 0.016 |
| gi 4507521   | transketolase isoform 1                                                                            | 1.017 | 1.186 | 1.432 | 5 | 1.212 | 0.209 |
| gi 7706747   | transient receptor potential cation channel, subfamily C, member 4 isoform alpha                   | 1.077 | 1.394 | 1.181 | 2 | 1.217 | 0.162 |
| gi 386785    | heat shock protein                                                                                 | 1.408 | 1.051 | 1.197 | 5 | 1.219 | 0.179 |
| gi 5032057   | S100 calcium binding protein A11                                                                   | 1.255 | 1.192 | 1.209 | 2 | 1.219 | 0.033 |
| gi 1582221   | prepro-cathepsin C                                                                                 | 1.39  |       | 1.053 | 2 | 1.222 | 0.238 |
| gi 494395    | Chain C, X-Ray Crystal Structure Of Canine Myeloperoxidase At 3 Angstroms Resolution               | 1.079 | 1.224 | 1.365 | 5 | 1.223 | 0.143 |
| gi 1916850   | scaffold protein Pbp1                                                                              | 1.139 | 1.468 | 1.062 | 1 | 1.223 | 0.216 |
| gi 4432754   | ribosomal protein L27a                                                                             |       | 1.296 | 1.153 | 1 | 1.225 | 0.101 |
| gi 194384576 | unnamed protein product                                                                            | 1.267 | 1.241 | 1.171 | 3 | 1.226 | 0.050 |
| gi 178277    | S-adenosylhomocysteine hydrolase                                                                   | 1.269 | 1.226 | 1.189 | 2 | 1.228 | 0.040 |
| gi 4557817   | 3-oxoacid CoA transferase 1 precursor                                                              | 1.268 | 1.45  | 0.967 | 2 | 1.228 | 0.244 |
| gi 4884148   | hypothetical protein                                                                               | 1.316 | 1.158 | 1.217 | 2 | 1.230 | 0.080 |
| gi 119614885 | eosinophil peroxidase, isoform CRA_a                                                               | 1.238 | 1.24  | 1.216 | 3 | 1.231 | 0.013 |
| gi 703093    | serine hydroxymethyltransferase                                                                    | 1.199 | 1.056 | 1.442 | 5 | 1.232 | 0.195 |
| gi 23512215  | Chitinase 3-like 1 (cartilage glycoprotein-39)                                                     | 1.203 | 1.321 | 1.178 | 5 | 1.234 | 0.076 |
| gi 196049886 | Chain A, Crystal Structure Of Human 3-Oxoacid Coa Transferase 1                                    | 1.268 | 1.395 | 1.043 | 2 | 1.235 | 0.178 |
| gi 29789195  | basic transcription factor 3-like 4                                                                | 1.394 | 1.054 | 1.265 | 1 | 1.238 | 0.172 |
| gi 3043670   | KIAA0573 protein                                                                                   |       | 1.091 | 1.386 | 1 | 1.239 | 0.209 |
| gi 4504523   | heat shock 10kDa protein 1                                                                         | 1.245 | 1.295 | 1.181 | 5 | 1.240 | 0.057 |
| gi 13562132  | catalase                                                                                           | 1.23  | 1.301 | 1.198 | 5 | 1.243 | 0.053 |
| gi 30047125  | Ribosomal protein SA                                                                               | 1.186 | 1.304 | 1.245 | 5 | 1.245 | 0.059 |
| gi 157831273 | Chain A, Hnrnp A1 (Rbd1,2) From Homo Sapiens                                                       | 1.295 |       | 1.206 | 4 | 1.251 | 0.063 |
| gi 9910280   | UDP-glucose ceramide glucosyltransferase-like 1 isoform 1                                          | 1.119 | 1.383 | 1.251 | 5 | 1.251 | 0.132 |
| gi 565169    | early-pregnancy factor                                                                             | 1.245 | 1.331 | 1.181 | 3 | 1.252 | 0.075 |
| gi 1942977   | Chain A, Macrophage Migration Inhibitory Factor (Mif)                                              | 1.31  | 1.374 | 1.076 | 2 | 1.253 | 0.157 |
| gi 4826940   | prolylcarboxypeptidase isoform 1 preproprotein                                                     | 0.883 | 1.366 | 1.525 | 1 | 1.258 | 0.334 |
| gi 167744990 | Chain A, Solution Structure Of The Tandem Hmg Box Domain From Human High Mobility Group Protein B1 |       | 1.313 | 1.213 | 3 | 1.263 | 0.071 |
| gi 11139093  | GrpE-like protein cochaperone                                                                      | 1.12  | 1.503 | 1.168 | 5 | 1.264 | 0.209 |
| gi 1773227   | HP1Hs-gamma                                                                                        | 1.225 | 1.344 | 1.227 | 2 | 1.265 | 0.068 |
| gi 71773329  | annexin VI isoform 1                                                                               | 1.179 | 1.326 | 1.309 | 4 | 1.271 | 0.080 |
| gi 194377012 | unnamed protein product                                                                            | 1.517 | 1.054 | 1.246 | 3 | 1.272 | 0.233 |
| gi 62088648  | tumor rejection antigen (gp96) 1 variant                                                           | 1.319 | 0.966 | 1.548 | 3 | 1.278 | 0.293 |

|              |                                                                                                   |       |       |       |   |       |       |
|--------------|---------------------------------------------------------------------------------------------------|-------|-------|-------|---|-------|-------|
| gi 230867    | Chain R, Twinning In Crystals Of Human Skeletal Muscle D-Glyceraldehyde-3-Phosphate Dehydrogenase | 1.496 | 1.244 | 1.094 | 5 | 1.278 | 0.203 |
| gi 4501881   | actin, alpha 1, skeletal muscle                                                                   | 1.548 | 1.371 | 0.918 | 5 | 1.279 | 0.325 |
| gi 39644554  | LAMP1 protein                                                                                     | 1.21  | 1.458 | 1.173 | 3 | 1.280 | 0.155 |
| gi 7705925   | dicarbonyl/L-xylulose reductase                                                                   | 1.233 | 1.273 | 1.345 | 3 | 1.284 | 0.057 |
| gi 6005757   | chromatin-specific transcription elongation factor large subunit                                  | 1.151 | 1.354 | 1.362 | 3 | 1.289 | 0.120 |
| gi 1673514   | B-cell receptor associated protein                                                                | 1.195 | 1.402 | 1.271 | 1 | 1.289 | 0.105 |
| gi 494394    | Chain A, X-Ray Crystal Structure Of Canine Myeloperoxidase At 3 Angstroms Resolution              | 1.199 | 1.268 | 1.408 | 5 | 1.292 | 0.106 |
| gi 577062    | glutathione peroxidase                                                                            | 1.615 | 1.208 | 1.053 | 3 | 1.292 | 0.290 |
| gi 119614878 | myeloperoxidase, isoform CRA_c                                                                    | 1.194 | 1.161 | 1.524 | 5 | 1.293 | 0.201 |
| gi 35655     | unnamed protein product                                                                           | 1.242 | 1.228 | 1.427 | 2 | 1.299 | 0.111 |
| gi 35218     | unnamed protein product                                                                           | 1.295 | 1.326 | 1.309 | 4 | 1.310 | 0.016 |
| gi 31183     | eosinophil preperoxidase (AA -127 to 575)                                                         | 1.238 | 1.24  | 1.468 | 4 | 1.315 | 0.132 |
| gi 178409    | alpha-L-fucosidase precursor (EC 3.2.1.5)                                                         | 1.285 | 1.386 | 1.287 | 2 | 1.319 | 0.058 |
| gi 34527427  | unnamed protein product                                                                           | 1.35  | 1.216 | 1.4   | 3 | 1.322 | 0.095 |
| gi 19070529  | CABLES                                                                                            | 1.35  | 1.216 | 1.404 | 2 | 1.323 | 0.097 |
| gi 16924265  | Enoyl Coenzyme A hydratase 1, peroxisomal                                                         | 1.295 | 1.311 | 1.366 | 3 | 1.324 | 0.037 |
| gi 189067487 | unnamed protein product                                                                           | 1.211 | 1.317 | 1.446 | 5 | 1.325 | 0.118 |
| gi 4105819   | Rab7                                                                                              | 1.456 | 1.333 | 1.199 | 5 | 1.329 | 0.129 |
| gi 6014895   | Cystatin-F                                                                                        | 1.319 | 1.371 | 1.368 | 1 | 1.353 | 0.029 |
| gi 633073    | protein-tyrosine phosphatase                                                                      | 1.382 | 1.513 | 1.293 | 4 | 1.396 | 0.111 |
| gi 11345462  | signal peptidase complex subunit 3                                                                | 0.983 | 1.708 | 1.548 | 1 | 1.413 | 0.381 |
| gi 7022407   | unnamed protein product                                                                           | 1.351 | 1.278 | 1.61  | 1 | 1.413 | 0.174 |
| gi 5729810   | emopamil binding protein (sterol isomerase)                                                       | 1.342 |       | 1.494 | 1 | 1.418 | 0.107 |
| gi 1703167   | AP-1 complex subunit beta-1                                                                       | 1.329 |       | 1.509 | 1 | 1.419 | 0.127 |
| gi 74706932  | Putative endoplasmin-like protein                                                                 | 1.369 | 1.402 | 1.487 | 1 | 1.419 | 0.061 |
| gi 112490564 | Chain J, Structure Of Human Ferritin L. Chain                                                     | 1.41  | 1.543 | 1.312 | 5 | 1.422 | 0.116 |
| gi 182516    | ferritin light subunit                                                                            | 1.394 | 1.57  | 1.336 | 5 | 1.433 | 0.122 |
| gi 32628     | ICAM-3                                                                                            | 1.43  |       | 1.442 | 1 | 1.436 | 0.008 |
| gi 17402893  | phosphoserine aminotransferase isoform 1                                                          | 1.295 | 1.454 | 1.679 | 3 | 1.476 | 0.193 |
| gi 4506773   | S100 calcium-binding protein A9                                                                   | 1.506 | 1.571 | 1.499 | 1 | 1.525 | 0.040 |
| gi 5231228   | ribonuclease T2 precursor                                                                         | 1.314 | 1.567 | 1.72  | 3 | 1.534 | 0.205 |
| gi 9955206   | Rho GDP-dissociation factor 2                                                                     | 1.417 | 1.46  | 1.773 | 3 | 1.550 | 0.194 |
| gi 4758504   | hydroxysteroid (17-beta) dehydrogenase 10 isoform 1                                               | 1.541 |       | 1.574 | 1 | 1.558 | 0.023 |
| gi 8037945   | prothymosin alpha                                                                                 | 1.541 |       | 1.574 | 1 | 1.558 | 0.023 |
| gi 11321591  | high-mobility group box 2                                                                         | 1.634 | 1.921 | 1.396 | 2 | 1.650 | 0.263 |
| gi 4503143   | cathepsin D                                                                                       | 1.574 | 1.734 | 1.655 | 3 | 1.654 | 0.080 |
| gi 119239    | Bone marrow proteoglycan                                                                          | 1.626 | 1.785 | 1.733 | 1 | 1.715 | 0.081 |
| gi 28375485  | unnamed protein product                                                                           | 1.917 | 1.952 | 1.548 | 3 | 1.806 | 0.224 |
| gi 968888    | HMG-1                                                                                             | 1.821 | 1.924 | 1.798 | 2 | 1.848 | 0.067 |
| gi 186461558 | neutrophil elastase                                                                               | 1.935 | 1.951 | 1.957 | 2 | 1.948 | 0.011 |
| gi 627372    | alpha-mannosidase precursor                                                                       | 2.291 | 2.056 | 1.811 | 1 | 2.053 | 0.240 |

|             |                                       |       |       |       |   |       |       |
|-------------|---------------------------------------|-------|-------|-------|---|-------|-------|
| gi 4506191  | proteasome beta 10 subunit proprotein | 2.15  | 2.145 | 2.323 | 1 | 2.206 | 0.101 |
| gi 4504437  | heme oxygenase (decyclizing) 1        | 3.203 | 1.713 | 2.054 | 2 | 2.323 | 0.781 |
| gi 223582   | histone H4                            | 2.332 | 2.388 | 2.505 | 5 | 2.408 | 0.088 |
| gi 356168   | histone H1b                           | 2.929 | 2.963 | 2.381 | 5 | 2.758 | 0.327 |
| gi 386772   | histone H3                            | 2.64  | 2.479 | 3.279 | 3 | 2.799 | 0.423 |
| gi 1568557  | histone H2B                           | 2.577 | 2.888 | 3.465 | 4 | 2.977 | 0.451 |
| gi 12654715 | TXNDC5 protein                        | 3.327 | 3.353 | 2.732 | 5 | 3.137 | 0.351 |
| gi 510990   | histone H2A                           | 4.592 | 4.429 | 3.595 | 5 | 4.205 | 0.535 |
| gi 32111    | unnamed protein product               | 5.999 | 4.425 | 4.272 | 1 | 4.899 | 0.956 |

**Table S2. The detailed quantification results for proteins with substantial changes.**

| name                                                                                                                                                                     | forward set1 | forward set2 | reverse set3 | No. of Peptides Quantified | Average | S.D.  |
|--------------------------------------------------------------------------------------------------------------------------------------------------------------------------|--------------|--------------|--------------|----------------------------|---------|-------|
| A. Histone and HMG proteins                                                                                                                                              |              |              |              |                            |         |       |
| gj 11321591 HMG-2<br><b>K.YEKDIAAYR.A</b><br><b>K.LKEKEYEKDIAAYR.A</b>                                                                                                   | 1.634        | 1.921        | 1.396        | 2                          | 1.65    | 0.263 |
| gj 968888 HMG-1<br><b>K.IKGEHPGLSIGDVAK.K</b><br><b>K.LKEKEYEKDIAAYR.A</b><br><b>K.KHPDASVNFSEFSK.K</b>                                                                  | 1.821        | 1.924        | 1.798        | 3                          | 1.847   | 0.067 |
| gj 223582 histone H4<br><b>R.DAVTYTEHAK.R</b><br><b>R.ISGLIYEETR.G</b><br><b>K.TVTAMDVVYALKR.Q</b><br><b>K.VFLENVIRDAVTYTEHAK.R</b><br><b>K.VFLENVIR.D</b>               | 2.332        | 2.388        | 2.505        | 5                          | 2.408   | 0.088 |
| gj 386772 histone H3<br><b>K.STELLIR.K</b><br><b>R.KLPFQR.L</b><br><b>R.KLPFQR.L</b>                                                                                     | 2.64         | 2.479        | 3.279        | 3                          | 2.799   | 0.423 |
| gj 356168 histone H1b<br><b>K.ATGPPVSELITK.A</b><br><b>K.ALAAGGYDVEKNNR.</b><br><b>K.ALAAAGYDVEK.N</b><br><br><b>-.SETAPAAPAAPAPAEKTPVKK.K</b><br><br><b>K.GTLVQTK.G</b> | 2.929        | 2.963        | 2.381        | 5                          | 2.758   | 0.327 |
| gj 1568557 histone H2B<br><b>R.LLLPGELAK.H</b><br><b>R.EIQTAVR.L</b><br><b>K.AMGIMNSFVNDIFER.I</b><br><b>R.KESYSVYVYK.V</b><br><b>K.QVHPDTGISSK.A</b>                    | 2.577        | 2.888        | 3.465        | 5                          | 2.977   | 0.451 |
| gj 510990 histone H2A<br><b>K.VTIAQGGVLPNIQAVLLPK.K</b><br><b>R.HLQLAIR.N</b><br><b>R.HLQLAIRNDEELNK.L</b><br><b>R.NDEELNKLLGK.V</b><br><b>R.AGLQFPVGR.V</b>             | 4.592        | 4.429        | 3.595        | 5                          | 4.205   | 0.535 |
| B. Translation related proteins                                                                                                                                          |              |              |              |                            |         |       |
| gj 38202255 threonyl-tRNA synthetase<br><b>K.WPFWLSPR.Q</b><br><b>R.NELSGALTGLTR.V</b>                                                                                   | 0.552        | 0.728        | 0.512        | 2                          | 0.597   | 0.115 |

|                                                                                                                                                                    |       |       |       |   |       |       |
|--------------------------------------------------------------------------------------------------------------------------------------------------------------------|-------|-------|-------|---|-------|-------|
| gij181969 elongation factor 2<br><b>R.ETVSEESNVL<u>CL</u>SK.S</b><br><b>K.AYLPVNESFGFTADLR.S</b><br><b>K.EGIPALDNFLDKL.-</b>                                       | 0.447 | 0.545 | 0.636 | 3 | 0.543 | 0.094 |
| gij19353009 Similar to Elongation factor 2b<br><b>R.VFSGLVSTGLK.V</b><br><b>R.TFCQLILDPIFK.V</b>                                                                   | 0.55  | 0.65  | 0.651 | 2 | 0.617 | 0.058 |
| gij4506707 ribosomal protein S25<br><b>R.AALQELLS<u>K</u>.G</b>                                                                                                    | 0.552 | 0.615 | 0.771 | 1 | 0.646 | 0.113 |
| C. hnRNP<br>gij386547 d(TTAGGG)n-binding protein B39<br><b>.IFVGGLSPDTPEEK.I</b>                                                                                   | 0.652 | 0.592 | 0.25  | 1 | 0.498 | 0.217 |
| gij119597533 heterogeneous nuclear ribonucleoprotein U, isoform CRA_b<br><b>K.EKPYFPIPEEYTFIQNVPLEDR.V</b>                                                         | 0.583 | 0.582 | 0.602 | 1 | 0.589 | 0.012 |
| gij55958547 heterogeneous nuclear ribonucleoprotein K<br><b>R.TDYNASVSVPDSSGPER.I</b><br><b>R.NTDEMVELR.I</b><br><b>R.SRNTDEMVELR.I</b>                            | 0.773 | 0.724 | 0.489 | 3 | 0.662 | 0.152 |
| D. Enzymes<br>gij531202 spermidine synthase<br><b>R.KVLIIGGGDGGVLR.E</b><br><b>K.VLIIGGGDGGVLR<u>E</u></b>                                                         | 0.466 | 0.465 | 0.773 | 2 | 0.568 | 0.178 |
| gij41584442 fatty acid synthase<br><b>R.GTPLISPLIK.W</b><br><b>R.GYAVLGGER.G</b><br><b>K.TGTVSLEVR.V</b><br><b>R.LQVVDQPLPVR.G</b><br><b>R.DNLEFFLAGIGR.L</b>      | 0.704 | 0.612 | 0.512 | 5 | 0.609 | 0.096 |
| gij66392203 NME1-NME2 protein<br><b>R.GLVGEIHKR.F</b><br><b>K.DRPFFAGLVK.Y</b><br><b>K.EHYVDLKDRPFFAGLVK.Y</b><br><b>R.TFIAIKPDGVQR.G</b><br><b>K.FMQASEDLLK.E</b> | 0.704 | 0.441 | 0.78  | 5 | 0.642 | 0.178 |
| gij1230564 Gu protein<br><b>R.APQVLVLAPTR.E</b><br><b>K.TFSFAIPLIEK.L</b>                                                                                          | 0.743 | 0.693 | 0.489 | 2 | 0.642 | 0.135 |
| gij2661039 alpha enolase<br><b>K.EGLELLK.T</b>                                                                                                                     | 0.564 | 0.689 | 0.691 | 5 | 0.648 | 0.073 |



|                                                                                                                                                                                                                         |       |       |       |   |       |       |
|-------------------------------------------------------------------------------------------------------------------------------------------------------------------------------------------------------------------------|-------|-------|-------|---|-------|-------|
| <b>R.IGAEVYHNLK.N</b><br><b>R.YISPDQLADLYK.S</b><br><b>R.AAVPSGASTGIYEALER.D</b><br><b>K.LAMQEFMILPVGAANFR.E</b>                                                                                                        |       |       |       |   |       |       |
| gi 190281 protein phosphatase I<br>alpha subunit<br><b>R.EIFLSQPILLELEAPLK.I</b>                                                                                                                                        | 0.683 | 0.657 | 0.643 | 1 | 0.661 | 0.02  |
| gi 4507789 ubiquitin-conjugating<br>enzyme E2L 3 isoform 1<br><b>K.ELEEIR.K</b><br><b>R.ADLAEEYSK.D</b><br><b>R.IEINFPAEYPFKPPK.I</b><br><b>K.GQVCLPVISAENWKPATK</b><br><b>R.NIQVDEANLLTWQGLIVPDNPPY</b><br><b>DK.G</b> | 0.614 | 0.657 | 0.734 | 5 | 0.668 | 0.061 |
| gi 5231228 ribonuclease T2<br>precursor<br><b>R.ELDLNSVLLK.L</b><br><b>HGTCAAQVDALNSQK.K</b><br><b>K.LQIKPSINYYQVADFK.D</b>                                                                                             | 1.314 | 1.567 | 1.72  | 3 | 1.533 | 0.205 |
| gi 4758504 hydroxysteroid (17-beta)<br>dehydrogenase 10 isoform 1<br><b>R.LVGQGASAVLLDLPNSGGEAQA</b><br><b>K.K</b>                                                                                                      | 1.541 |       | 1.574 | 1 | 1.557 | 0.023 |
| gi 4503143 cathepsin D<br><b>R.VGFAEAAR.L</b><br><b>R.VGFAEAARL.-</b>                                                                                                                                                   | 1.574 | 1.734 | 1.655 | 2 | 1.654 | 0.08  |
| gi 186461558 neutrophil elastase<br><b>R.QVFAVQR.I</b><br><b>R.VVLGAHNLSR.R</b>                                                                                                                                         | 1.935 | 1.951 | 1.957 | 2 | 1.948 | 0.011 |
| gi 627372 alpha-mannosidase<br>precursor<br><b>R.HLVLLDTAQAAAAGHR.L</b>                                                                                                                                                 | 2.291 | 2.056 | 1.811 | 1 | 2.053 | 0.24  |
| gi 4504437 heme oxygenase<br>(decyclizing) 1<br><b>R.TPELLVAHAYTR.Y</b><br><b>R.YLGDLSGGQVLK.K</b>                                                                                                                      | 3.203 | 1.713 | 2.054 | 2 | 2.323 | 0.781 |
| gi 12654715 TXNDC5 protein<br><b>R.GYPTLLFR.G</b><br><b>R.GYPTLLWFR.D</b><br><b>R.DLESLREYVESQLQR.T</b><br><b>K.ALAPTWEQLALGLEHSETVK.I</b>                                                                              | 3.327 | 3.353 | 2.732 | 4 | 3.138 | 0.351 |
| E. Others<br>gi 21755073 unnamed protein<br>product<br><b>K.MDLNSEQAEQLER.I</b>                                                                                                                                         | 0.442 | 0.416 | 0.403 | 1 | 0.42  | 0.02  |

|                                                                                                                                                            |       |       |       |   |       |        |
|------------------------------------------------------------------------------------------------------------------------------------------------------------|-------|-------|-------|---|-------|--------|
| gi 119587276 hCG19802, isoform CRA_a<br><b>M.AEVQVLVLDGR.G</b>                                                                                             | 0.621 | 0.551 | 0.243 | 1 | 0.472 | 0.201  |
| gi 35570 unnamed protein product<br><b>K.NLDDGIDDER.L</b><br><b>R.IVATKPLYVALAQR.K</b>                                                                     | 0.552 | 0.521 | 0.411 | 2 | 0.495 | 0.074  |
| gi 13477237 ZNF607 protein<br><b>R.FDAGELITQR.E</b><br><b>K.SLVARFDAGELITQR.E</b>                                                                          | 0.555 |       | 0.486 | 2 | 0.52  | 0.049  |
| gi 56462484 MHC class I antigen<br><b>R.AYLEGLCVEWLR.R</b><br><b>R.FIAVGYVDDTQFVR.F</b><br><b>R.APWIEQEGPEYWDGETR.N</b><br><b>R.DGEDQTQDTELVETRPAGDR.T</b> | 0.703 | 0.56  | 0.453 | 4 | 0.572 | 0.125  |
| gi 194374111 unnamed protein product<br><b>M.YGCDVGPDGR.L</b><br><b>K.THVTHHPISDHEATLR.C</b>                                                               | 0.663 | 0.603 | 0.456 | 2 | 0.573 | 0.1065 |
| gi 35844 unnamed protein product<br><b>K.ELSLAGNELGDEGAR.L</b>                                                                                             | 0.442 | 0.551 | 0.739 | 1 | 0.577 | 0.151  |
| gi 114645930 PREDICTED: nucleosome assembly protein 1-like 1 isoform 9<br><b>K.GIPEFWLTVFK.N</b><br><b>K.FYEEVHDLER.K</b><br><b>R.LDGLVETPTGYIESLPR.V</b>  | 0.583 | 0.615 | 0.599 | 3 | 0.599 | 0.016  |
| gi 431422 Ran/TC4 Binding Protein<br><b>R.FLNAENAQK.F</b><br><b>K.TLEEDEEELFK.M</b>                                                                        | 0.673 | 0.769 | 0.358 | 2 | 0.6   | 0.215  |
| gi 2580550 dead box, X isoform<br><b>K.DLLDLLVEAK.Q</b><br><b>R.SFLDLLLNATGK.D</b><br><b>K.TAAFLLPILSQIYSDGPGEALR.A</b>                                    | 0.602 | 0.71  | 0.512 | 3 | 0.608 | 0.099  |
| gi 122168 HLA class I histocompatibility antigen, B-58 $\alpha$ chain<br><b>R.DGEDQTQDTELVETRPAGDR.T</b><br><b>R.VAEQLR.A</b>                              | 0.731 | 0.724 | 0.375 | 2 | 0.61  | 0.204  |
| gi 181486 DNA-binding protein B                                                                                                                            | 0.592 | 0.716 | 0.587 | 1 | 0.632 | 0.073  |

**R.EDGNEEDKENQGDETQGQPP  
QR.R**

|                                                                                                                                        |       |       |       |   |       |       |
|----------------------------------------------------------------------------------------------------------------------------------------|-------|-------|-------|---|-------|-------|
| gij193788267 unnamed protein product                                                                                                   | 0.681 | 0.658 | 0.538 | 3 | 0.626 | 0.077 |
| <b>R.AIRLELQGPR.G</b><br><b>K.NLPYKVTQDELKEVFEDAAEIR.L</b><br><b>K.EVFEDAAEIR.L</b>                                                    |       |       |       |   |       |       |
| gij801893 leucine-rich PPR-motif containing protein                                                                                    | 0.547 | 0.595 | 0.742 | 2 | 0.628 | 0.101 |
| <b>K.TVLDQQQTPSR.L</b><br><b>K.VIEPQYFGLAYLFR.K</b>                                                                                    |       |       |       |   |       |       |
| gij5107666 importin $\beta$                                                                                                            | 0.59  | 0.453 | 0.849 | 5 | 0.631 | 0.201 |
| <b>R.VAALQNLVK.I</b><br><b>R.VLANPGNSQVAR.V</b><br><b>K.SNEILTAIQGMR.K</b><br><b>K.LAATNALLNSLEFTK.A</b><br><b>R.AAVENLPTFLVELSR.V</b> |       |       |       |   |       |       |
| gij1235727 unnamed protein product                                                                                                     | 0.562 |       | 0.71  | 2 | 0.636 | 0.104 |
| <b>K.EPLVDVDPK.Q</b><br><b>R.ATLYVTAIEDR.Q</b>                                                                                         |       |       |       |   |       |       |
| gij40225729 FUBP1 protein                                                                                                              | 0.706 |       | 0.589 | 1 | 0.647 | 0.083 |
| <b>R.ITGDPYKVQQAK.E</b><br><b>R.LLDQIVEK.G</b><br><b>K.IQIAPDSGGLPER.S</b>                                                             |       |       |       |   |       |       |
| gij119571409 hCG1643342, isoform CRA_a                                                                                                 | 0.682 | 0.635 | 0.627 | 1 | 0.648 | 0.03  |
| <b>K.LLEPVLLLGER</b>                                                                                                                   |       |       |       |   |       |       |
| gij386777 transplantation antigen                                                                                                      | 0.716 | 0.636 | 0.618 | 2 | 0.657 | 0.052 |
| <b>R.FSDAASPR.G</b><br><b>K.THVTHHPLSDHEATLR.C</b>                                                                                     |       |       |       |   |       |       |
| gij1136741 KIAA0002                                                                                                                    | 0.731 | 0.812 | 0.438 | 3 | 0.661 | 0.197 |
| <b>K.AIADTGANVVVTGGK.V</b><br><b>K.FAEAFEAIR.A</b><br><b>K.TVGATALPR.L</b>                                                             |       |       |       |   |       |       |
| gij23712 myoblast antigen 24.1D5                                                                                                       | 0.574 | 0.704 | 0.71  | 3 | 0.663 | 0.077 |
| <b>R.AVVIVDDR.G</b><br><b>R.FATHAALSVR.N</b><br><b>R.NLSPYVSNELLEAFSQFGPIER.A</b>                                                      |       |       |       |   |       |       |
| gij13569879 acidic (leucine-rich) nuclear phosphoprotein 32 family, member E isoform 1                                                 | 0.616 | 0.753 | 0.629 | 3 | 0.666 | 0.076 |
| <b>K.SLDLFNCEITNLEDYR.E</b><br><b>K.DLSTVEALQNLK.N</b>                                                                                 |       |       |       |   |       |       |

**K.IKDLSTVEALQNLK.N**

|                                                                                                                                                |       |       |       |   |       |       |
|------------------------------------------------------------------------------------------------------------------------------------------------|-------|-------|-------|---|-------|-------|
| gi 4506773 S100 calcium-binding protein A9<br><b>K.ELPGFLQSGK.D</b>                                                                            | 1.506 | 1.571 | 1.499 | 1 | 1.525 | 0.040 |
| gi 9955206 Rho GDP-dissociation factor 2<br><b>K.TLLGDGPVVTPDK.A</b><br><b>K.APNVVVTR.L</b><br><b>R.LTLVCESAPGPITMDLTGDLEAL</b><br><b>KK.E</b> | 1.417 | 1.46  | 1.773 | 3 | 1.55  | 0.194 |
| gi 8037945 prothymosin alpha<br><b>K.EVVEEAENGR.D</b>                                                                                          | 1.541 |       | 1.574 | 1 | 1.557 | 0.023 |
| gi 119239 Bone marrow proteoglycan<br><b>R.GNLVSIHNFNINR.I</b>                                                                                 | 1.626 | 1.785 | 1.733 | 1 | 1.714 | 0.081 |
| gi 28375485 unnamed protein product<br><b>K.LKPLEVELR.R</b>                                                                                    | 1.917 | 1.952 | 1.548 | 1 | 1.806 | 0.224 |
| gi 4506191 proteasome beta 10 subunit proprotein<br><b>R.LPFTALGSGQDAALAVLEDR.F</b>                                                            | 2.15  | 2.145 | 2.323 | 1 | 2.206 | 0.101 |
| gi 32111 unnamed protein product<br><b>R.AGLQFPVGR.V</b>                                                                                       | 5.999 | 4.425 | 4.272 | 1 | 4.899 | 0.956 |

**Table S3. The detailed quantification results for histone proteins.**

| Experiments | histones                      | Peptide Ratio<br>(treated/untreated) | Protein Ratio<br>(Treated/Untreated) | Standard<br>Deviation |
|-------------|-------------------------------|--------------------------------------|--------------------------------------|-----------------------|
|             | <b>gi 223582 histone H4</b>   |                                      |                                      |                       |
| Set 1       | K.VFLENVIR.D                  | 2.28                                 | 2.33                                 | 0.16                  |
|             | R.ISGLIYEETR.G                | 2.51                                 |                                      |                       |
|             | K.TVTAMDVVYALK.R              | 2.20                                 |                                      |                       |
| Set 2       | R.DAVTYTEHAK.R                | 2.40                                 | 2.39                                 | 0.26                  |
|             | R.ISGLIYEETR.G                | 2.18                                 |                                      |                       |
|             | K.TVTAMDVVYALKR.Q             | 2.40                                 |                                      |                       |
|             | K.VFLENVIRDAVTYTEHAK.R        | 2.83                                 |                                      |                       |
|             | K.VFLENVIR.D                  | 2.09                                 |                                      |                       |
|             | R.DNIQGITKPAIR.R              | 2.42                                 |                                      |                       |
| Set 3       | K.VFLENVIR.D                  | 2.36                                 | 2.51                                 | 0.19                  |
|             | R.ISGLIYEETR.                 | 2.24                                 |                                      |                       |
|             | K.VFLENVIRDAVTYTEHAK.R        | 2.66                                 |                                      |                       |
|             | K.TVTAMDVVYALKR.Q             | 2.58                                 |                                      |                       |
|             | K.VFLENVIR.D                  | 2.68                                 |                                      |                       |
|             | <b>gi 510990 histone H2A</b>  |                                      |                                      |                       |
| Set 1       | R.HLQLAIR.N                   | 2.36                                 | 4.59                                 | 1.96                  |
|             | R.VTIAQGGVLPNIQAVLLPK.K       | 5.43                                 |                                      |                       |
|             | R.AGLQFPVGR.V                 | 5.99                                 |                                      |                       |
| Set 2       | K.VTIAQGGVLPNIQAVLLPK.K       | 5.86                                 | 4.43                                 | 1.86                  |
|             | R.HLQLAIR.N                   | 3.84                                 |                                      |                       |
|             | R.HLQLAIRNDEELNK.L            | 3.74                                 |                                      |                       |
|             | R.NDEELNKLLGK.V               | 2.01                                 |                                      |                       |
|             | R.AGLQFPVGR.V                 | 6.70                                 |                                      |                       |
| Set 3       | R.AGLQFPVGR.V                 | 3.56                                 | 3.60                                 | 0.38                  |
|             | R.AGLQFPVGR.V                 | 4.06                                 |                                      |                       |
|             | R.HLQLAIR.N                   | 3.90                                 |                                      |                       |
|             | R.HLQLAIRNDEELNK.L            | 3.16                                 |                                      |                       |
|             | R.HLQLAIRNDEELNKLLGK.V        | 3.30                                 |                                      |                       |
|             | <b>gi 1568551 histone H2B</b> |                                      |                                      |                       |
| Set 1       | K.ESYSIVYK.V                  | 2.62                                 | 2.58                                 | 0.04                  |
|             | R.LLLPGELAK.H                 | 2.55                                 |                                      |                       |
|             | K.QVHPDTGISSK.A               | 2.56                                 |                                      |                       |
| Set 2       | R.LLLPGELAK.H                 | 2.86                                 | 2.89                                 | 0.24                  |
|             | R.EIQTAVR.L                   | 2.67                                 |                                      |                       |
|             | K.AMGIMNSFVNDIFER.I           | 2.52                                 |                                      |                       |
|             | R.KESYSIVYK.V                 | 3.21                                 |                                      |                       |
|             | K.QVHPDTGISSK.A               | 3.00                                 |                                      |                       |
|             | K.ESYSIVYK.V                  | 2.85                                 |                                      |                       |
|             | K.AMGIMNSFVNDIFER.I           | 2.71                                 |                                      |                       |
|             | R.KESYSIVYK.V                 | 3.21                                 |                                      |                       |
|             | K.ESYSIVYK.V                  | 2.96                                 |                                      |                       |
| Set 3       | K.AMGIMNSFVNDIFER.I           | 4.21                                 | 3.47                                 | 0.90                  |
|             | K.AMGIMNSFVNDIFERIAGEASR.L    | 4.50                                 |                                      |                       |
|             | K.AMGIMNSFVNDIFER.I           | 2.92                                 |                                      |                       |
|             | R.EIQTAVR.L                   | 3.39                                 |                                      |                       |
|             | R.KESYSIVYK.V                 | 2.31                                 |                                      |                       |

|       |                              |       |      |      |
|-------|------------------------------|-------|------|------|
|       | <b>gij386772 histone H3</b>  |       |      |      |
| Set 1 | K.STELLIR.K                  | 2.50  | 2.64 | 0.20 |
|       | K.DIQLAR.H                   | 2.78  |      |      |
| Set 2 | K.STELLIR.K                  | 2.52  | 2.48 | 0.06 |
|       | R.KLPFQR.L                   | 2.44  |      |      |
| Set 3 | K.STELLIR.K                  | 3.06  | 3.28 | 0.35 |
|       | K.DIQLAR.H                   | 3.68  |      |      |
|       | R.YRPGTVALR.E                | 3.10  |      |      |
|       | <b>gij356168 histone H1b</b> |       |      |      |
| Set 1 | R.SGVSLAALK.K                | 2.45  | 2.93 | 0.84 |
|       | K.ATGPPVSELITK.A             | 2.439 |      |      |
|       | K.ALAAAGYDVEK.N              | 3.899 |      |      |
| Set 2 | K.ATGPPVSELITK.A             | 2.342 | 2.96 | 0.94 |
|       | K.ALAAGGYDVEKNNSR.           | 2.566 |      |      |
|       | K.ALAAAGYDVEK.N              | 1.974 |      |      |
|       | _SETAPAAPAAPAPAEKTPVKK.K     | 3.959 |      |      |
|       | K.GTLVQTK.G                  | 3.975 |      |      |
| Set 3 | K.ALAAAGYDVEK.N              | 2.281 | 2.38 | 0.14 |
|       | K.ATGPPVSELITK.A             | 2.481 |      |      |

**Table S4. Quantification results for hnRNPs, translation initiation factors, elongation factors and ribosomal proteins.**

| <b>hnRNPs</b>                     |                                                                                         | <b>Forward,</b> | <b>Forward,</b> | <b>Reverse,</b> | <b>Peptide</b> | <b>Average</b>       | <b>S.D.</b> |
|-----------------------------------|-----------------------------------------------------------------------------------------|-----------------|-----------------|-----------------|----------------|----------------------|-------------|
| <b>GI Number and Protein Name</b> |                                                                                         | <b>Set 1</b>    | <b>Set 2</b>    | <b>Set 3</b>    | <b>Number</b>  | <b>Ratio</b>         |             |
| gi 386547                         | d(TTAGGG)n-binding protein B39                                                          | 0.652           | 0.592           | 0.25            | 1              | 0.50                 | 0.217       |
| gi 133254                         | Heterogeneous nuclear ribonucleoprotein A1                                              | 1.024           | 0.962           | 1.208           | 5              | 1.07                 | 0.128       |
| gi 58761496                       | heterogeneous nuclear ribonucleoprotein A1-like                                         | 0.875           |                 | 0.891           | 3              | 0.88                 | 0.011       |
| gi 14110407                       | heterogeneous nuclear ribonucleoprotein D-like                                          | 0.771           | 0.963           | 1.009           | 3              | 0.91                 | 0.126       |
| gi 4826760                        | heterogeneous nuclear ribonucleoprotein F                                               | 0.805           | 0.855           | 0.992           | 5              | 0.88                 | 0.097       |
| gi 542850                         | heterogeneous nuclear ribonucleoprotein G - human                                       | 1.116           | 0.982           | 0.93            | 5              | 1.01                 | 0.096       |
| gi 5031753                        | heterogeneous nuclear ribonucleoprotein H1                                              | 0.752           | 0.855           | 0.709           | 3              | 0.77                 | 0.075       |
| gi 55958547                       | heterogeneous nuclear ribonucleoprotein K                                               | 0.773           | 0.724           | 0.489           | 3              | 0.66                 | 0.152       |
| gi 55958543                       | heterogeneous nuclear ribonucleoprotein K                                               | 0.935           | 1.01            | 1.207           | 3              | 1.05                 | 0.140       |
| gi 5031755                        | heterogeneous nuclear ribonucleoprotein R isoform 2                                     | 0.861           | 0.973           | 0.764           | 3              | 0.87                 | 0.105       |
| gi 119597533                      | heterogeneous nuclear ribonucleoprotein U (scaffold attachment factor A), isoform CRA_b | 0.583           | 0.582           | 0.602           | 1              | 0.59                 | 0.012       |
| gi 109082737                      | PREDICTED: heterogeneous nuclear ribonucleoprotein C (C1/C2) isoform 2                  | 0.812           | 1.061           | 1.182           | 5              | 1.02                 | 0.189       |
|                                   |                                                                                         |                 |                 |                 |                | <b>Average Ratio</b> | <b>0.85</b> |

**eukaryotic translation initiation factor**

| <b>GI Number and Protein Name</b>                                                   | <b>Forward,<br/>Set 1</b> | <b>Forward,<br/>Set 2</b> | <b>Reverse,<br/>Set 3</b> | <b>Peptide<br/>Number</b> | <b>Average<br/>Ratio</b> | <b>S.D.</b> |
|-------------------------------------------------------------------------------------|---------------------------|---------------------------|---------------------------|---------------------------|--------------------------|-------------|
| gi 119610575 eukaryotic translation initiation factor 4A, isoform 1, isoform CRA_c  | 0.646                     | 0.693                     | 0.697                     | 3                         | 0.68                     | 0.028       |
| gi 33356163 eukaryotic translation initiation factor 1A, Y chromosome               | 0.745                     | 0.59                      | 0.762                     | 3                         | 0.70                     | 0.095       |
| gi 485388 eukaryotic initiation factor 4All                                         | 0.646                     | 0.718                     | 0.775                     | 2                         | 0.71                     | 0.065       |
| gi 4503529 eukaryotic translation initiation factor 4A isoform 1                    | 0.859                     | 0.715                     | 0.796                     | 5                         | 0.79                     | 0.072       |
| gi 4261795 eukaryotic initiation factor 5A                                          |                           | 1                         | 0.708                     | 1                         | 0.85                     | 0.206       |
| gi 4503545 eukaryotic translation initiation factor 5A isoform B                    | 0.757                     | 0.821                     | 0.889                     | 2                         | 0.82                     | 0.066       |
| gi 4503519 eukaryotic translation initiation factor 3, subunit 5 epsilon, 47kDa     | 1.078                     | 1.186                     | 0.783                     | 1                         | 1.02                     | 0.209       |
| gi 7705433 eukaryotic translation initiation factor 3 subunit 6 interacting protein | 0.895                     |                           | 1.034                     |                           | 0.97                     | 0.099       |
|                                                                                     |                           |                           |                           | <b>Average<br/>Ratio</b>  | <b>0.82</b>              |             |



**eukaryotic translation elongation factor**

| <b>GI Number and Protein Name</b> | <b>Forward, Set 1</b> | <b>Forward, Set 2</b> | <b>Reverse, Set 3</b> | <b>Peptide Number</b> | <b>Average Ratio</b> | <b>S.D.</b> |
|-----------------------------------|-----------------------|-----------------------|-----------------------|-----------------------|----------------------|-------------|
| gi 181969                         | 0.447                 | 0.545                 | 0.636                 | 3                     | 0.54                 | 0.09        |
| gi 19353009                       | 0.55                  | 0.65                  | 0.651                 | 2                     | 0.62                 | 0.06        |
| gi 4503475                        | 0.684                 | 0.652                 | 0.726                 | 1                     | 0.69                 | 0.04        |
| gi 7108915                        | 0.685                 | 0.677                 | 0.703                 | 3                     | 0.69                 | 0.01        |
| gi 4503471                        | 0.684                 | 0.652                 | 0.841                 | 2                     | 0.73                 | 0.10        |
| gi 62897525                       | 0.789                 | 0.722                 | 0.68                  | 3                     | 0.73                 | 0.06        |
| gi 4503481                        | 0.729                 | 0.637                 | 0.834                 | 2                     | 0.73                 | 0.10        |
| gi 119602640                      | 0.729                 | 0.743                 | 0.874                 | 5                     | 0.78                 | 0.08        |
| gi 194239729                      | 0.797                 | 0.764                 | 0.907                 | 5                     | 0.82                 | 0.08        |
| gi 927065                         | 0.789                 | 0.827                 | 0.909                 | 3                     | 0.84                 | 0.06        |
| gi 170785039                      | 0.759                 | 0.954                 | 0.839                 | 3                     | 0.85                 | 0.10        |
| gi 4503483                        | 0.862                 | 0.811                 | 0.956                 | 5                     | 0.88                 | 0.07        |
| gi 181965                         |                       | 0.897                 | 0.731                 | 1                     | 0.81                 | 0.12        |
| gi 119594429                      | 0.977                 | 0.998                 | 0.956                 | 3                     | 0.98                 | 0.02        |
| gi 1220311                        | 0.911                 | 0.829                 | 1.209                 | 3                     | 0.98                 | 0.20        |
| gi 38522                          | 0.911                 | 0.868                 | 1.209                 | 5                     | 1.00                 | 0.19        |
| gi 704416                         | 1.149                 | 1.043                 | 0.98                  | 5                     | 1.06                 | 0.09        |
| gi 25453472                       | 1.105                 | 1.243                 | 1.013                 | 5                     | 1.12                 | 0.12        |
|                                   |                       |                       |                       | <b>Average Ratio</b>  | <b>0.82</b>          |             |

## Ribosomal Proteins

| GI Number and Protein Name |                                                          | Forward,<br>Set 1 | Forward,<br>Set 2 | Reverse,<br>Set 3 | Peptide<br>Number | Average<br>Ratio | S.D.  |
|----------------------------|----------------------------------------------------------|-------------------|-------------------|-------------------|-------------------|------------------|-------|
| gi 4506707                 | ribosomal protein S25                                    | 0.552             | 0.615             | 0.771             | 1                 | 0.65             | 0.113 |
| gi 4506669                 | ribosomal protein P1 isoform 1                           | 0.625             | 0.706             | 0.729             | 2                 | 0.69             | 0.055 |
| gi 4506661                 | ribosomal protein L7a                                    | 0.702             | 0.649             | 0.734             | 2                 | 0.70             | 0.043 |
| gi 550021                  | ribosomal protein S5                                     | 0.458             | 0.815             | 0.829             | 4                 | 0.70             | 0.210 |
| gi 7513316                 | ribosomal protein L14                                    | 0.758             | 0.652             | 0.726             | 5                 | 0.71             | 0.054 |
| gi 119587829               | ribosomal protein S25, isoform CRA_a                     |                   | 0.634             | 0.835             | 3                 | 0.73             | 0.142 |
| gi 4506685                 | ribosomal protein S13                                    | 0.789             | 0.586             | 0.845             | 2                 | 0.74             | 0.136 |
| gi 74723863                | 60S acidic ribosomal protein P0-like                     | 0.76              | 0.923             | 0.558             | 3                 | 0.75             | 0.183 |
| gi 5032051                 | ribosomal protein S14                                    | 0.793             | 0.763             | 0.769             | 3                 | 0.78             | 0.016 |
| gi 36138                   | ribosomal protein L6                                     | 0.816             | 0.763             | 0.766             | 2                 | 0.78             | 0.030 |
| gi 15431301                | ribosomal protein L7                                     | 0.767             | 0.782             | 0.801             | 4                 | 0.78             | 0.017 |
| gi 89573879                | ribosomal protein L18                                    | 0.726             | 0.942             | 0.719             | 1                 | 0.80             | 0.127 |
| gi 119572747               | ribosomal protein L18, isoform CRA_d                     | 0.726             | 0.942             | 0.719             | 1                 | 0.80             | 0.127 |
| gi 14591909                | ribosomal protein L5                                     | 0.843             | 0.744             | 0.826             | 3                 | 0.80             | 0.053 |
| gi 4506667                 | ribosomal protein P0                                     | 0.76              | 0.923             | 0.742             | 5                 | 0.81             | 0.100 |
| gi 4506697                 | ribosomal protein S20                                    | 0.81              | 0.93              | 0.724             | 5                 | 0.82             | 0.103 |
| gi 7705813                 | ribosomal protein L26-like 1                             | 0.774             | 0.826             | 0.886             | 5                 | 0.83             | 0.056 |
| gi 14165469                | ribosomal protein S15a                                   | 0.763             | 0.795             | 0.928             | 5                 | 0.83             | 0.088 |
| gi 6912634                 | ribosomal protein L13a                                   | 0.82              | 1.048             | 0.621             | 2                 | 0.83             | 0.214 |
| gi 113417504               | PREDICTED: similar to ribosomal protein L12              | 0.777             | 0.804             | 0.913             | 3                 | 0.83             | 0.072 |
| gi 73959145                | PREDICTED: similar to 40S ribosomal protein S2 isoform 4 | 0.987             | 0.791             | 0.719             | 1                 | 0.83             | 0.139 |
| gi 119615473               | ribosomal protein L11, isoform CRA_a                     | 0.875             | 0.847             | 0.783             | 3                 | 0.84             | 0.047 |
| gi 119605048               | ribosomal protein L18a, isoform CRA_b                    | 0.774             | 0.762             | 0.97              | 3                 | 0.84             | 0.117 |
| gi 4506597                 | ribosomal protein L12                                    | 0.777             | 0.819             | 0.913             | 5                 | 0.84             | 0.070 |
| gi 292435                  | ribosomal protein L26                                    | 0.756             | 0.826             | 0.941             | 5                 | 0.84             | 0.093 |
| gi 113429348               | PREDICTED: similar to ribosomal protein S10              | 0.801             | 0.911             | 0.812             | 2                 | 0.84             | 0.061 |
| gi 4432750                 | ribosomal protein L11                                    | 0.866             | 0.833             | 0.836             | 1                 | 0.85             | 0.018 |
| gi 7765076                 | S3 ribosomal protein                                     | 0.971             |                   | 0.726             | 5                 | 0.85             | 0.173 |
| gi 114606879               | PREDICTED: similar to ribosomal protein isoform 2        | 0.866             | 0.905             | 0.813             | 3                 | 0.86             | 0.046 |
| gi 4506613                 | ribosomal protein L22 proprotein                         | 0.826             | 0.75              | 1.009             | 2                 | 0.86             | 0.133 |
| gi 495126                  | ribosomal protein L11                                    | 0.766             | 0.975             | 0.845             | 3                 | 0.86             | 0.106 |
| gi 6677809                 | ribosomal protein S6                                     | 0.921             | 0.879             | 0.804             | 3                 | 0.87             | 0.059 |

|              |                                                 |       |       |       |   |                      |             |
|--------------|-------------------------------------------------|-------|-------|-------|---|----------------------|-------------|
| gi 4506723   | ribosomal protein S3a                           |       | 0.953 | 0.792 | 5 | 0.87                 | 0.114       |
| gi 119592221 | ribosomal protein S4, X-linked, isoform CRA_a   |       | 0.863 | 0.884 | 3 | 0.87                 | 0.015       |
| gi 4506607   | ribosomal protein L18                           | 0.921 | 0.937 | 0.799 | 2 | 0.89                 | 0.075       |
| gi 4506715   | ribosomal protein S28                           | 0.717 | 0.928 | 1.015 | 3 | 0.89                 | 0.153       |
| gi 36142     | ribosomal protein homologous to yeast S24       | 0.766 | 0.918 | 0.982 | 1 | 0.89                 | 0.111       |
| gi 14141193  | ribosomal protein S9                            | 0.833 | 0.922 | 0.916 | 5 | 0.89                 | 0.050       |
| gi 553640    | ribosomal protein S13                           | 1.073 | 0.723 | 0.904 | 1 | 0.90                 | 0.175       |
| gi 4506691   | ribosomal protein S16                           | 0.704 | 1.115 | 0.885 | 5 | 0.90                 | 0.206       |
| gi 4506679   | ribosomal protein S10                           | 0.992 | 0.849 | 0.873 | 3 | 0.90                 | 0.077       |
| gi 4506703   | ribosomal protein S24 isoform c                 | 0.804 | 1.019 | 0.891 | 3 | 0.90                 | 0.108       |
| gi 119575011 | ribosomal protein S24, isoform CRA_i            | 0.804 | 1.019 | 0.891 | 3 | 0.90                 | 0.108       |
| gi 21104402  | IMR-90 ribosomal protein S3                     | 0.914 | 0.905 | 0.906 | 5 | 0.91                 | 0.005       |
| gi 4506743   | ribosomal protein S8                            | 0.91  | 0.922 | 0.905 | 5 | 0.91                 | 0.009       |
| gi 119572749 | ribosomal protein L18, isoform CRA_f            | 1.035 | 0.924 | 0.785 | 5 | 0.91                 | 0.125       |
| gi 23491733  | ribosomal protein S2                            | 0.865 | 0.901 | 1.021 | 5 | 0.93                 | 0.082       |
| gi 4506695   | ribosomal protein S19                           | 0.972 |       | 0.897 | 3 | 0.93                 | 0.053       |
| gi 15431303  | ribosomal protein L9                            | 0.84  | 0.942 | 1.051 | 4 | 0.94                 | 0.106       |
| gi 62896495  | ribosomal protein P0 variant                    | 1.094 | 0.762 | 1.085 | 3 | 0.98                 | 0.189       |
| gi 4506635   | ribosomal protein L32                           | 1.047 | 0.904 | 0.996 | 1 | 0.98                 | 0.072       |
| gi 4506681   | ribosomal protein S11                           | 1.169 | 0.912 | 0.931 | 5 | 1.00                 | 0.143       |
| gi 13366090  | ribosomal protein L7a                           | 1.054 | 1.142 | 0.849 | 2 | 1.02                 | 0.150       |
| gi 73948356  | PREDICTED: similar to 40S ribosomal protein S16 | 0.964 | 1.038 | 1.075 | 5 | 1.03                 | 0.057       |
| gi 1655596   | ribosomal protein L31                           | 1.078 | 1.037 | 1.012 | 3 | 1.04                 | 0.033       |
| gi 36146     | ribosomal protein S12                           | 1.216 | 1.037 | 0.922 | 5 | 1.06                 | 0.148       |
| gi 414587    | ribosomal protein L10                           | 1.008 | 1.062 | 1.179 | 5 | 1.08                 | 0.087       |
| gi 4506609   | ribosomal protein L19                           | 1.058 | 1.063 | 1.306 | 5 | 1.14                 | 0.142       |
| gi 4432754   | ribosomal protein L27a                          |       | 1.296 | 1.153 | 1 | 1.22                 | 0.101       |
| gi 30047125  | Ribosomal protein SA                            | 1.186 | 1.304 | 1.245 | 5 | 1.25                 | 0.059       |
|              |                                                 |       |       |       |   | <b>Average Ratio</b> | <b>0.88</b> |
